# Supplementary material for: Catalytic enantioselective addition of isocyanoacetate to 3-methyl-4-nitro-5-styrylisoxazoles under phase transfer catalysis conditions
Source: Royal Society of Chemistry journal article supplement (doi:10.1039/c5ob01880c), 2015-01-01

# Catalytic enantioselective addition of Isocyanoacetate esters to 4-Nitro-5-styrylisoxazoles under phase transfer catalysis conditions.

*Paolo Disetti,<sup>a</sup> Maria Moccia,<sup>b</sup> Diana Salazar Illera,<sup>a</sup> Surisetti Suresh,<sup>a</sup> and Mauro F. A. Adamo<sup>a</sup>*

\*

a) Centre for Synthesis and Chemical Biology (CSCB), Department of Pharmaceutical and Medicinal Chemistry, the Royal College of Surgeons in Ireland, 123 St. Stephen's Green, Dublin 2, Ireland; Fax: (+353) 1 4022168; E-mail: [madamo@rcsi.ie](mailto:madamo@rcsi.ie)

b) National Research Council-Institute of Crystallography, Via G. Amendola 122/O, 70126 Bari, Italy.

## Supporting Information

### Table of Contents

|                                                                           |         |
|---------------------------------------------------------------------------|---------|
| 1. General Experimental                                                   | page 2  |
| 2. General procedure for the preparation of product <b>3a-m</b> (Table 2) | page 3  |
| 3. Analytical data for compounds <b>3a-m</b>                              | page 3  |
| 4. General procedure for the preparation of product <b>4a-m</b> (Table 2) | page 11 |
| 5. Analytical data for compounds <b>4a-m</b>                              | page 11 |
| 6. Preparation of catalysts <b>6l</b> and <b>6m</b>                       | page 19 |
| 7. Preparation of pyrrolidines <b>7-9</b>                                 | page 20 |
| 8. Spectra and HPLC of compounds <b>3a-m</b> , <b>4a-m</b> and <b>7-9</b> | page 22 |

## 1. General Experimental :

General Methods.  $^1\text{H}$ ,  $^{13}\text{C}$ , NMR spectra were recorded on a Varian AS 300, Bruker 400 and 600 spectrometer. Chemical shifts ( $\delta$ ) are reported in ppm relative to residual solvent signals for  $^1\text{H}$  and  $^{13}\text{C}$  NMR ( $^1\text{H}$  NMR: 7.26 ppm for  $\text{CDCl}_3$ ;  $^{13}\text{C}$  NMR: 77.0 ppm for  $\text{CDCl}_3$ .  $^{13}\text{C}$  NMR spectra were acquired with  $^1\text{H}$  broad band decoupled mode. DMSO- $d_6$  (referenced to 2.52 and 3.35 ppm for  $^1\text{H}$  and 40.0 for  $^{13}\text{C}$ ). Coupling constants (J) are in Hz. Multiplicities are reported as follows: s, singlet, d, doublet, dd, doublets of doublets, t, triplet, q, quartet, m, multiplet, c, complex, and br, broad. Melting points were determined using a Stuart scientific melting point apparatus and are uncorrected. Infrared spectra (IR) were recorded as KBr disc using a Bruker Tensor27 FT-IR instrument. Absorption maximum ( $\nu_{\text{max}}$ ) was reported in wave numbers ( $\text{cm}^{-1}$ ) and only selected peaks are reported. High resolution mass spectra were obtained on a Waters Micro mass LCT and low resolution mass spectra were recorded on Waters Micro mass Quattro LC-MS spectrometers at 70 eV. Tetrahydrofuran was freshly distilled over sodium benzophenone prior to use according to standard procedure. All other reagents and solvents were used as purchased from Aldrich. Reactions were checked for completion by TLC (EM Science, silica gel 60 F254). Flash chromatography was performed using silica gel 60 (0.040-0.063 mm, 230-400 mesh).

The enantiomeric excess (ee) of the products was determined by chiral stationary phase HPLC (Daicel Chiralpak AD, Daicel Chiralpak AD-H Chiracel OJ, Chiracel OD, Chiralpak AS columns), using a UV detector operating at 254 nm. Retention factors (Rf) are reported to  $\pm 0.05$ .

Racemic samples were prepared using tetra-*N*-butylammonium bromide as a catalyst at room temperature overnight. 3-Methyl-4-nitro-styrylisoxazoles were prepared through the Knoevenagel condensation between 3,5-dimethyl-4-nitroisoxazole and the appropriate aromatic or heteroaromatic aldehyde (piperidine 0.1 equiv., EtOH, 65 °C, 2-3 hours).<sup>1</sup>

## 2. General procedure for the organocatalytic, enantioselective preparation of compounds **3a-m** (Table 2).

To a test tube equipped with a magnetic stirring bar were sequentially added the 5-styrylisoxazole **1a-m** (0.1 mmol), catalyst **6l** or **6m** (0.01 mmol, 10 mol% loading), ethylisocyanoacetate (0.5 mmol, 5 equiv.) and toluene (0.5 mL). The test tube was placed at -20°C, then finely ground K<sub>2</sub>CO<sub>3</sub> (0.5 mmol) was added in one portion. The mixture was then vigorously stirred at the same temperature, with no precautions to exclude moisture or air. After the stated reaction time, the reaction was filtered on a short plug of silica gel to remove the catalyst, the solvent and un-reacted ethyl isocyanoacetate evaporated in vacuo and the residue purified by flash chromatography to give compounds **3a-m** as a 1:1 mixture of diastereoisomers.

## 3. Analytical data for compounds **3a-m**

**(3R)-ethyl 2-isocyano-4-(3-methyl-4-nitroisoxazol-5-yl)-3-phenylbutanoate (3a).** Following the general procedure using catalyst **6l** (6 mg, 0.010 mmol, 10 mol%) for 78h at -20° C. The product was purified on silica gel (ethyl ether/petroleum ether 50:75) dried and the title compound was obtained in 88% yield (dr 1:1) as yellow oil. IR 2985, 2148, 1754, 1520; <sup>1</sup>H NMR (CDCl<sub>3</sub>, 300 MHz) δ 7.35-7.27 (m,10H), 4.64 (d, J= 4.5, 1H), 4.52 (t, J= 2.4, 1H), 4.26-

---

<sup>1</sup> M. F. A. Adamo, E. F. Duffy, V. R. Konda,; F. Murphy, *Heterocycles* **2007**, *71*, 1173.

4.19 (dq, J= 7.2, J= 14.4, 2H), 4.17-4.10 (dq, J= 6.9, J= 14.1, 2H), 4.02-3.90 (m, 4H), 3.78-3.65 (m, 2H), 2.52 (s, 3H), 2.48 (s, 3H), 1.24 (t, J= 7.2, 3H), 1.51 (t, J=7.2, 3H); <sup>13</sup>C NMR (CDCl<sub>3</sub>, 100.6 MHz) δ 171.3, 171.2, 164.9, 164.6, 163.6, 163.2, 155.8, 155.6, 135.9, 134.8, 129.2, 129.0, 128.9, 128.9, 128.1, 127.7, 63.3, 63.0, 61.8, 61.0, 44.8, 44.1, 30.2, 28.6, 14.0, 13.9, 11.6, 11.6. HRMS found: [M-H]<sup>-</sup> 342.1082, C<sub>17</sub>H<sub>16</sub>N<sub>3</sub>O<sub>5</sub>, requires: 342.1090; *m/z*: 342 (100%, [M-H]<sup>-</sup>).

**(3*R*)-ethyl 2-isocyano-4-(3-methyl-4-nitroisoxazol-5-yl)-3-*p*-tolylbutanoate (3b).**

Following the general procedure using catalyst **6l** (6.0 mg, 0.010 mmol, 10 mol%) for 52 h at -20°C. The product was purified on silica gel (ethyl ether/petroleum ether 50:75) and the title compound was obtained in 91% yield (dr 1:1) as yellow oil. IR 2974, 2136, 1744, 1510; <sup>1</sup>H NMR (CDCl<sub>3</sub>, 400 MHz) δ 7.10 (d, J= 8, 4H), 7.05 (d, J=7.6, 4H), 4.52 (d, J= 4.4, 1H), 4.40 (d, J= 3.2, 1H), 4.40-4.09 (m, 2H), 4.06 (dq, J= 7.2, J= 14.4, 2H), 3.90-3.81 (m, 4H), 3.65-3.57 (m, 2H), 2.44 (s, 3H), 2.40 (s, 3H), 2.24 (s, 6H), 1.17 (t, J= 7.2, 3H), 1.09 (t, J= 7.2, 3H); <sup>13</sup>C NMR (CDCl<sub>3</sub>, 100.6 MHz) δ 171.44, 171.3, 165.0, 164.6, 155.7, 155.6, 138.8, 138.7, 132.7, 131.6, 129.8, 129.6, 127.9, 127.5, 63.3, 63.0, 62.0, 61.0, 44.4, 43.8, 30.3, 28.6, 21.1, 21.1, 13.9, 11.6. HRMS found: [M-H]<sup>-</sup> 356.1251, C<sub>18</sub>H<sub>18</sub>N<sub>3</sub>O<sub>5</sub>, requires: 356.1246; *m/z*: 356 (100%, [M-H]<sup>-</sup>).

**(3*R*)-ethyl 3-(4-chlorophenyl)-2-isocyano-4-(3-methyl-4-nitroisoxazol-5-yl)butanoate (3c).**

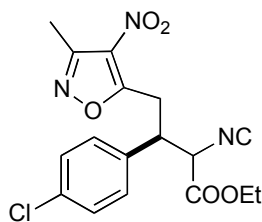

Following the general procedure using ethylisocyanoacetate and catalyst **6m** (5.76 mg, 0.010 mmol, 10 mol%) for 58h at -20°C. The product was purified on silica gel (ethyl ether/petroleum ether 50:75) and the title compound was obtained in 85% yield (dr 1:1) as yellow oil. IR 2982, 2136 1746, 1518; <sup>1</sup>H NMR (CDCl<sub>3</sub>, 300 MHz) δ 7.26-7.7.23 (m, 4H), 7.22-7.17 (m, 4H), 4.54 (d, J= 4.4, 1H), 4.42 (d, J= 4.8, 1H), 4.17 (dq, J= 6.8, J= 0.8, 2H), 4.07 (q, J= 6.8, 2H), 3.92-3.80 (m, 4H), 3.65-3.60 (m, 2H), 2.45 (s, 3H), 2.41 (s, 3H), 1.20 (t, J= 7.2, 3H), 1.10 (t, J=7.2, 3H); <sup>13</sup>C NMR (CDCl<sub>3</sub>, 400 MHz) δ 170.9, 170.7, 164.7, 164.3, 155.8, 155.7, 137.1, 135.1, 134.9, 134.3, 133.2, 132.9, 129.5, 129.4, 129.2, 129.1, 63.5, 63.2, 44.0, 43.5, 30.2, 28.4, 13.9, 11.6; HRMS found: [M-H]<sup>-</sup> 376.0710, C<sub>17</sub>H<sub>15</sub>ClN<sub>3</sub>O<sub>5</sub>, requires: 376.0700; *m/z*: 376 (100%, [M-H]<sup>-</sup>).

**(3R)-ethyl 2-isocyano-3-(2-methoxyphenyl)-4-(3-methyl-4-nitroisoxazol-5-yl) butanoate (3d).**

Following the general procedure using catalyst **6m** (5.76 mg, 0.010 mmol, 10 mol%) for 120h at -20°C. The product was purified on silica gel (ethyl ether/petroleum ether 50:75) and the title compound was obtained in 83% yield (dr 2:1) as yellow oil. IR 2999, 2153, 1737, 1510; <sup>1</sup>H NMR (CDCl<sub>3</sub>, 400 MHz) δ 7.02-7.163 (m, 4H), 7.10-7.07 (dd, J= 1.2, 2H), 6.83-6.76 (m, 6H), 4.75 (d, J=6.8, 3H), 4.18-4.09 (m, 5H), 4.08-4.03 (q, J= 4.4, J=11.2, 4H), 3.96 (dd, J= 10.4, J= 14.8, 2H), 3.85 (dd, J= 9.8, J= 14.9, 1H), 3.78 (s, 6H), 3.75 (s, 3H), 3.60 (dd, J= 4.8, J= 14.8, 3H), 2.41 (s, 3H), 2.39 (s, 6H), 1.16 (t, J= 7.2, 3H), 1.08 (t, J= 7.2, 6H); <sup>13</sup>C (CDCl<sub>3</sub>, 100.6 MHz) δ 171.9, 171.8, 165.3, 165.3, 162.0, 161.8, 157.0, 157.0, 155.5, 155.5, 129.9,129.9, 129.3, 129.2, 123.4, 123.3, 121.0, 120.9, 110.9, 62.9, 62.8, 59.7, 59.2, 55.4, 55.4, 41.0, 40.3, 28.8, 27.4, 13.9, 13.8, 11.6; HRMS found:[M-H]<sup>-</sup> 372.1200, C<sub>18</sub>H<sub>18</sub>N<sub>3</sub>O<sub>6</sub>, requires: 372.1196; *m/z*: 372 (100%, [M-H]<sup>-</sup>).

**(3R)-ethyl 3-(4-fluorophenyl)-2-isocyano-4-(3-methyl-4-nitroisoxazol-5-yl)butanoate (3e).**

Following the general procedure using catalyst **6m** (5.76 mg, 0.010 mmol, 10 mol%) for 26h at -20°C. The product was purified on silica gel (ethyl ether/petroleum ether 50:75) and the title compound was obtained in 93% yield (dr 1:1) as yellow oil. IR 2972, 2155, 1746, 1518; <sup>1</sup>H NMR (CDCl<sub>3</sub>, 400 MHz) δ 7.24-7.20 (m, 4H), 6.98-6.93 (m, 4H), 4.55 (d, J= 4.4, 1H), 4.41 (d, J= 4.8, 1H), 4.16 (dq, J= 1.2, J= 7.2, 2H), 4.07 (dq, J= 1.2, J= 7.2, 2H), 3.93-3.80 (m, 4H), 3.65-3.61 (m, 2H), 2.45 (s, 3H), 2.41 (s, 3H), 1.19 (t, J=7.2, 3H), 1.09 (t, J=7.2, 3H); <sup>13</sup>C (CDCl<sub>3</sub>, 100.6 MHz) δ 171.0, 170.9, 164.8, 164.4, 155.8, 155.7, 130.0, 129.9, 129.6, 129.5, 116.3, 116.1, 115.9, 63.4, 63.1, 44.0, 43.4, 30.4, 28.7, 13.9, 11.5; HRMS found:[M-H]<sup>-</sup> 360.0989, C<sub>17</sub>H<sub>15</sub>FN<sub>3</sub>O<sub>5</sub>, requires: 360.0996; *m/z*: 360 (100%, [M-H]<sup>-</sup>).

**(3S)-ethyl 3-(furan-2-yl)-2-isocyano-4-(3-methyl-4-nitroisoxazol-5-yl)butanoate (3f).**

Following the general procedure using catalyst **6l** (6 mg, 0.010 mmol, 10 mol%) for 183h at -20°C. The product was purified on silica gel (ethyl ether/petroleum ether 50:75) and the title compound was obtained in 91% yield (dr 1:1) as yellow oil. IR 2994, 2158, 1745, 1533; <sup>1</sup>H NMR (CDCl<sub>3</sub>, 400 MHz) δ 7.3-7.29 (m, 2H), 6.25 (t, J= 1.6, 4H), 4.6 (d, J= 4.8, 1H), 4.51 (d, J= 4.4, 1H), 4.25-4.16 (m, 4H), 4.03-4.00 (m, 2H), 3.85-3.73 (m, 2H), 3.63-3.54 (m, 2H), 2.48 (s, 3H), 2.46 (s, 3H), 1.25 (t, J= 7.2, 3H), 1.20 (t, J= 7.2, 3H); <sup>13</sup>C (CDCl<sub>3</sub>, 100.6 MHz) δ 170.9, 170.7, 164.6, 164.4, 163.5, 163.3, 155.8, 155.7, 149.0, 148.3, 143.2, 143.2, 110.7, 110.6, 109.2, 108.9, 63.5, 63.3, 59.7, 59.5, 39.0, 38.9, 29.7, 28.6, 27.2, 13.9, 11.6; HRMS found:[M-H]<sup>-</sup> 332.0891, C<sub>15</sub>H<sub>14</sub>N<sub>3</sub>O<sub>6</sub>, requires: 332.0883; *m/z*: 332 (100%, [M-H]<sup>-</sup>).

**(3R)-ethyl-2-isocyano-3-(4-methoxyphenyl)-4-(3-methyl-4-nitroisoxazol-5-yl)butanoate (3g).**

Following the general procedure using catalyst **6m** (7.56 mg, 0.010 mmol, 10 mol%) for 48h at -20°C. The product was purified on silica gel (ethyl ether/petroleum ether 50:75) and the title compound was obtained in 85% yield (dr 1:1) as yellow oil. IR 2994, 2156, 1753, 1520; <sup>1</sup>H NMR (CDCl<sub>3</sub>, 400 MHz) δ 7.15-7.13 (m, 4H), 6.78-6.75 (m, 4H), 4.51 (d, J= 4, 1H), 4.39 (d, J= 3.2, 1H), 4.39-4.12 (m, 2H), 4.09-4.04 (m, 2H), 3.86-3.83 (m, 4H), 3.71 (s, 3H), 3.70 (s, 3H), 3.61-3.56 (m, 2H), 2.44 (s, 3H), 2.40 (s, 3H), 1.81 (t, J= 7.2, 3H), 1.10 (t, J= 7.2, 3H); <sup>13</sup>C NMR(CDCl<sub>3</sub>, 100.6 MHz) δ 171.4, 171.3, 165.0, 164.6, 163.4, 163.0, 159.9, 159.8, 155.7, 155.6, 129.2, 128.9, 127.6, 126.5, 114.5, 114.3, 63.2, 63.0, 62.0, 61.1, 55.3, 55.2, 44.1, 43.5, 30.4, 29.7, 28.7, 13.9, 13.9, 11.6, 11.6; HRMS found:[M-H]<sup>-</sup> 372.1201, C<sub>18</sub>H<sub>18</sub>N<sub>3</sub>O<sub>6</sub>, requires: 372.1196; *m/z*: 372 (100%, [M-H]<sup>-</sup>).

**(3R)-ethyl 2-isocyano-4-(3-methyl-4-nitroisoxazol-5-yl)-3-*m*-tolylbutanoate (3h).**

Following the general procedure using catalyst **6l** (6.00 mg, 0.010 mmol, 10% mol) for 22h at -20° C. The product was purified on silica gel (ethyl ether/petroleum ether 50:75) and the title compound was obtained in 87% yield (dr 1:1) as yellow oil. IR 2992, 2155, 1753, 1520; <sup>1</sup>H NMR (CDCl<sub>3</sub>, 400 MHz) δ 7.16-7.11 (m, 2H), 7.04-7.01 (m, 6H), 4.52 (d, J= 4.4, 1H), 4.42 (d, J= 4.4, 1H), 4.15 (dq, J= 7.2, J= 0.8, 2H), 4.10-4.04 (m, 2H), 3.86-3.83 (m, 4H), 3.64-3.58 (m, 2H), 2.45 (s, 3H), 2.41 (s, 3H), 2.25 (s, 6H), 1.17 (t, J= 6.8, 3H), 1.08 (t, J= 7.2, 3H).<sup>13</sup>C NMR (CDCl<sub>3</sub>, 100.6 MHz) δ 171.4, 171.2, 165.0, 164.6, 155.8, 155.6, 138.9, 138.6, 135.8, 134.7, 129.7, 129.6, 129.0, 128.8, 128.4, 125.1, 124.7, 63.3, 63.0, 44.7, 44.1, 30.2, 28.55, 21.4, 21.39,

13.9, 11.6; HRMS found:[M-H]<sup>-</sup> 356.1237, C<sub>18</sub>H<sub>18</sub>N<sub>3</sub>O<sub>5</sub>, requires: 356.1246; *m/z*: 356 (100%, [M-H]<sup>-</sup>).

**(3*R*)-ethyl 2-isocyano-4-(3-methyl-4-nitroisoxazol-5-yl)-3-(4-nitrophenyl)butanoate (3i).**

Following the general procedure using catalyst **6l** (6.0 mg, 0.010 mmol, 10 mol%) for 46h at -20°C. The product was purified on silica gel (ethyl ether/petroleum ether 50:75) and the title compound was obtained in 92% yield (dr 1:1) as yellow oil. IR 2981, 2158, 1739, 1530, <sup>1</sup>H NMR (CDCl<sub>3</sub>, 400 MHz) δ 8.25 (d, *J*= 8.8, 1H), 8.17- 8.14 (m, 3H), 7.75 (d, *J*= 8.8, 1H), 7.48-7.45 (m, 3H), 4.61 (d, *J*= 4.8, 1H), 4.46 (d, *J*= 4.8, 1H), 4.22 (dq, *J*= 7.2, *J*= 1.6, 2H), 4.10 (q, *J*= 7.2, 2H), 4.06-4.02 (m, 2H), 3.92-3.85 (m, 2H), 3.73- 3.64 (m, 2H), 2.46 (s, 3H), 2.42 (s, 3H), 1.23 (t, *J*= 7.2, 3H), 1.12 (t, *J*= 7.2, 3H); <sup>13</sup>C NMR (CDCl<sub>3</sub>, 100.6 MHz) δ 170.2, 170.1, 164.8, 164.5, 164.3, 164.0, 155.9, 155.8, 148.3, 148.2, 143.0, 141.9, 139.6, 129.4, 129.0, 128.9, 124.4, 124.4, 124.1, 114.7, 63.8, 63.5, 44.2, 43.6, 30.07, 28.2, 13.9, 11.6, 11.5; HRMS found:[M-H]<sup>-</sup> 387.0931, C<sub>17</sub>H<sub>15</sub>N<sub>4</sub>O<sub>7</sub>, requires: 387.0941; *m/z*: 387 (100%, [M-H]<sup>-</sup>).

**(3*R*)-ethyl 3-(2,3-dichlorophenyl)-2-isocyano-4-(3-methyl-4-nitroisoxazol-5-yl) butanoate (3j).**

Following the general procedure using catalyst **6m** (5.76 mg, 0.010 mmol, 10 mol%) for 48h at -20°C. The product was purified on silica gel (ethyl ether/petroleum ether 50:75) and the title compound was obtained in 91% yield (dr 1:0.4) as yellow oil. IR 2964, 2145, 1740, 1522, <sup>1</sup>H NMR (CDCl<sub>3</sub>, 400 MHz) δ 7.38 (dt, *J*= 0.8, *J*= 8.0, 2.4H), 7.23-7.19 (m, 1.8H), 4.55 (m, 0.4H), 4.53 (d, *J*= 3.6, 1H), 4.27 (q, *J*= 6.8, 2H), 4.15-4.03 (m, 1.2H), 3.85 (dd, *J*=10.4, *J*= 15.2, 1H), 3.74 (t, *J*= 9.6, 0.8H), 3.57 (dd, *J*= 4.8, *J*= 15.2, 1H), 2.46 (s, 1.2H), 2.43 (s, 3H), 1.28 (t, *J*= 7.2,



3H), 1.10 (t, J= 7.2, 1.2H); <sup>13</sup>C NMR (CDCl<sub>3</sub>, 100.6 MHz) δ 170.5, 170.3, 164.6, 164.1, 163.6, 155.8, 155.8, 135.7, 135.4, 134.0, 132.3, 130.9, 130.9, 127.9, 126.6, 63.7, 63.3, 60.2, 59.4, 40.6, 29.4, 26.9, 14.0, 13.7, 11.6; HRMS found:[M-H]<sup>-</sup> 410.0309, C<sub>17</sub>H<sub>14</sub>Cl<sub>2</sub>N<sub>3</sub>O<sub>5</sub>, requires: 410.0311; *m/z*: 410 (100%, [M-H]<sup>-</sup>).

**(3R)-2-Isocyano-4-(3-methyl-4-nitro-isoxazol-5-yl)-3-naphthalen-2-yl-butyric acid ethyl ester (3k).**

Following the general procedure using catalyst **6m** (5.76 mg, 0.010 mmol, 10 mol%) for 65h at -20°C. The product was purified on silica gel (ethyl ether/petroleum ether 50:75) and the title compound was obtained in 86% yield (dr 1:1) as yellow oil. IR 2970, 2145, 1735, 1533, <sup>1</sup>H NMR (CDCl<sub>3</sub>, 400 MHz) δ 7.76-7.72 (m, 6H), 7.68-7.67 (m, 2H), 7.43-7.40 (m, 4H), 7.36 (dt, J= 1.6, J= 8.8, 2H), 4.62 (d, J= 4.8, 1H), 4.52 (d, J= 4.8, 1H), 4.16-3.97 (m, 8H), 3.74-3.65 (m, 2H), 2.40 (s, 3H), 2.35 (s, 3H), 1.12 (t, J= 7.2, 3H), 1.01 (t, J= 7.2, 3H); <sup>13</sup>C NMR (CDCl<sub>3</sub>, 100.6 MHz) δ 171.2, 171.1, 164.9, 164.6, 163.8, 163.4, 155.8, 155.6, 133.3, 133.2, 133.2, 133.1, 130.7, 129.2, 128.9, 128.1, 127.9, 127.7, 127.3, 126.7, 126.7, 126.6, 125.2, 124.9, 63.4, 63.1, 44.9, 44.3, 30.9, 30.3, 29.7, 28.5, 14.0, 13.9, 11.6, 11.5; HRMS found:[M-H]<sup>-</sup> 392.1238, C<sub>21</sub>H<sub>18</sub>N<sub>3</sub>O<sub>5</sub>, requires: 392.1249; *m/z*: 392 (100%, [M-H]<sup>-</sup>).

**(3R)-3-(4-Cyano-phenyl)-2-isocyano-4-(3-methyl-4-nitro-isoxazol-5-yl)-butyric acid ethyl ester (3l).**

Following the general procedure using catalyst **6m** (5.76 mg, 0.010 mmol, 10 mol%) for 48 h at -20°C. The product was purified on silica gel (ethyl ether/petroleum ether 50:75) and the title

compound was obtained in 86% yield (dr 1:1) as yellow oil. IR 2976, 2143, 1740, 1531. <sup>1</sup>H NMR (CDCl<sub>3</sub>, 400 MHz) δ 7.60-7.57 (m, 4H), 7.41-7.38 (m, 4H), 4.59 (d, J= 4.4, 1H), 4.44 (d, J= 4.8, 1H), 4.20 (q, J= 2, J= 7.2, 2H), 4.08 (q, J= 7.2, J= 14.4, 2H), 4.00-3.96 (m, 2H), 3.85 (m, 2H), 3.66 (m, 2H), 2.46 (s, 3H), 2.42 (s, 3H), 1.22 (t, J= 7.2, 3H), 1.10 (t, J= 7.2, 3H). <sup>13</sup>C NMR (CDCl<sub>3</sub>, 100.6 MHz) δ 170.4, 170.2, 164.6, 164.4, 164.3, 155.9, 155.8, 141.2, 140.0, 133.0, 132.7, 129.1, 128.7, 118.0, 117.9, 113.2, 113.1, 63.7, 63.4, 61.1, 60.3, 44.4, 43.9, 30.0, 29.7, 28.1, 14.1, 13.9, 11.6, 11.5; HRMS found:[M-H]<sup>-</sup> 367.1038, C<sub>18</sub>H<sub>15</sub>N<sub>4</sub>O<sub>5</sub>, requires: 367.1042; *m/z*: 367 (100%, [M-H]<sup>-</sup>).

**(3*S*)-ethyl 2-isocyano-5-methyl-3-((3-methyl-4-nitroisoxazol-5-yl)methyl)hexanoate (3m).**

Following the general procedure using catalyst **6l** (5.76 mg, 0.010 mmol, 10 mol%) for 48h at -20°C. The product was purified on silica gel (ethyl ether/petroleum ether 50:75) and the title compound was obtained in 88% yield (dr 1:1) as yellow oil. IR 2988, 2150, 1746, 1525. <sup>1</sup>H NMR (CDCl<sub>3</sub>, 400 MHz) δ 4.35 (d, J= 2.8, 1H), 4.25-4.18 (m, 5H), 3.41 (dd, J= 0.8, 1H), 3.26-3.13 (m, 3H), 2.69-2.67 (m, 2H), 2.69 (s, 3H), 2.67 (m, 3H), 1.58-1.50 (m, 3H), 1.42-1.25 (m, 6H), 1.25-1.15 (m, 3H), 0.89-0.87 (m, 6H), 0.84-0.81 (m, 6H); <sup>13</sup>C NMR (CDCl<sub>3</sub>, 100.6 MHz) δ 172.2, 172.1, 165.7, 165.3, 162.4, 162.3, 156.0, 155.9, 63.3, 63.1, 60.0, 58.9, 40.3, 38.9, 37.2, 36.7, 29.1, 28.3, 25.0, 25.0, 23.3, 23.0, 21.6, 21.6, 14.1, 14.0, 11.7; HRMS found:[M-H]<sup>-</sup> 322.1478, C<sub>18</sub>H<sub>15</sub>N<sub>4</sub>O<sub>5</sub>, requires: 322.1481; *m/z*: 322 (100%, [M-H]<sup>-</sup>).

#### 4. General procedure for the preparation of product 4a-m (Table 2)

To a solution of **3a-m** (0.1 mmol) in THF (1.0 mL) at 35°C DIPEA (0.2 mmol) was added. The solution was stirred until the starting was consumed (typically 3-8 hours). The solvents was removed under reduce pressure and purified by silica gel to afford desired **4a-m**.

#### 5. Analytical data for compounds 4a-m

##### **(2*S*,3*S*)-ethyl-4-(3-methyl-4-nitroisoxazol-5-yl)-3-phenyl-2,3-dihydro-1*H*-pyrrole-2-carboxylate (4a)**

Following the general procedure the product was purified on silica gel (ethyl ether/petroleum ether 1:1) and the title compound was obtained in 93% yield as yellow solid. The *ee* of the product was determined by HPLC using a Chiralpak AD-H column (*n*-hexane/*i*PrOH 80:20, flow rate 0.5 mL/min,  $t_{\text{maj}}$  = 18.2 min,  $t_{\text{min}}$  = 26.7 min, 99% *ee*). mp 54°C;  $[\alpha]_{\text{D}}^{20}$  = + 54 (c = 0.84 in CHCl<sub>3</sub>); IR 2976, 1736, 1545. <sup>1</sup>H NMR (CDCl<sub>3</sub>, 300 MHz) δ 8.76 (dd, J= 0.6, J=3.6, 1H), 7.33-7.31 (m, 2H), 7.30-7.22 (m, 3H), 5.69 (s, 1H), 4.81 (d, J=3.9, 1H), 4.40 (d, J=3.9, 1H), 4.39-4.25 (m, 2H), 2.46 (s, 3H), 1.36 (t, J=7.2, 3H); <sup>13</sup>C NMR (CDCl<sub>3</sub>, 75.4 0MHz) δ 171.5, 166.2, 156.5, 151.4, 142.6, 129.2, 127.8, 127.1, 102.7, 68.8, 62.6, 50.8, 14.4, 12.6; HRMS found:[M-H]<sup>-</sup> 342.1081, C<sub>17</sub>H<sub>16</sub>N<sub>3</sub>O<sub>5</sub>, requires: 342.1090; *m/z*: 342 (100%, [M-H]<sup>-</sup>).

##### **(2*S*,3*S*)-ethyl-4-(3-methyl-4-nitroisoxazol-5-yl)-3-*p*-tolyl-2,3-dihydro-1*H*-pyrrole-2-carboxylate (4b).**

Following the general procedure the product was purified on silica gel (ethyl ether/petroleum ether 1:1) and the title compound was obtained in 96% yield as yellow oil. The *ee* of the product

was determined by HPLC using a Chiralpak AD-H column (*n*-hexane/*i*PrOH 80:20, flow rate 0.5 mL/min,  $t_{\text{maj}} = 19.5$  min,  $t_{\text{min}} = 26.9$  min, 93% *ee*).  $[\alpha]_{\text{D}}^{20} = + 86$  ( $c = 0.54$  in  $\text{CHCl}_3$ ); IR 2988, 1742, 1550.  $^1\text{H}$  NMR ( $\text{CDCl}_3$ , 400 MHz)  $\delta$  8.6 (d,  $J = 3.2$ , 1H), 7.13 (d,  $J = 8$ , 2H), 7.04 (d,  $J = 8$ , 2H), 5.52 (s, 1H), 4.69 (d,  $J = 3.6$ , 1H), 4.31 (d,  $J = 4$ , 1H), 4.27-4.18 (m sistema ABX, 2H), 2.38 (s, 3H), 2.23 (s, 3H), 1.28 (t,  $J = 7.2$ , 3H);  $^{13}\text{C}$  ( $\text{CDCl}_3$ , 100.6 MHz)  $\delta$  171.4, 150.9, 139.5, 137.2, 129.6, 126.8, 102.8, 68.7, 62.3, 50.2, 21.0, 14.2, 12.3; HRMS found: $[\text{M}-\text{H}]^-$  356.1237,  $\text{C}_{18}\text{H}_{18}\text{N}_3\text{O}_5$ , requires: 356.1246;  $m/z$ : 356 (100%,  $[\text{M}-\text{H}]^-$ ).

**(2*S*,3*S*)-ethyl 3-(4-chlorophenyl)-4-(3-methyl-4-nitroisoxazol-5-yl)-2,3-dihydro-1*H*-pyrrole-2-carboxylate (4c).**

Following the general procedure the product was purified on silica gel (ethyl ether/petroleum ether 1:1) and the title compound was obtained in 92% yield as yellow oil. The *ee* of the product was determined by HPLC using a Chiralpak AD-H column (*n*-hexane/*i*PrOH 80:20, flow rate 0.5 mL/min,  $t_{\text{maj}} = 19.8$  min,  $t_{\text{min}} = 27.4$  min, 96% *ee*).  $[\alpha]_{\text{D}}^{20} = + 71$  ( $c = 0.72$  in  $\text{CHCl}_3$ ); IR 2980, 1740, 1547.  $^1\text{H}$  NMR ( $\text{CDCl}_3$ , 300 MHz)  $\delta$  8.73 (d,  $J = 2.7$ , 1H), 7.31-7.24 (m, 4H), 5.66 (s, 1H), 4.79 (d,  $J = 4.2$ , 1H), 4.39-4.23 (m, 3H), 4.6 (s, 3H), 1.36 (t,  $J = 7.2$ , 3H);  $^{13}\text{C}$  NMR ( $\text{CDCl}_3$ , 75.4 MHz)  $\delta$  171.2, 166.0, 156.6, 151.2, 141.1, 133.6, 129.4, 128.5, 102.4, 68.6, 62.7, 50.2, 14.4, 12.6; HRMS found: $[\text{M}-\text{H}]^-$  376.0711,  $\text{C}_{17}\text{H}_{15}\text{ClN}_3\text{O}_5$ , requires: 376.0700;  $m/z$ : 376 (100%,  $[\text{M}-\text{H}]^-$ ).

**(2*S*,3*S*)-ethyl 3-(2-methoxyphenyl)-4-(3-methyl-4-nitroisoxazol-5-yl)-2,3-dihydro-1*H*-pyrrole-2-carboxylate (4d).**

Following the general procedure the product was purified on silica gel (ethyl ether/petroleum ether 1:1) and the title compound was obtained in 96% yield as yellow oil. The *ee* of the product was determined by HPLC using a Chiralpak AD-H column (*n*-hexane/*i*PrOH 80:20, flow rate 0.5 mL/min,  $t_{\text{maj}} = 25.3$  min,  $t_{\text{min}} = 33.7$  min, 96% *ee*).  $[\alpha]_{\text{D}}^{20} = + 54$  ( $c = 0.52$  in  $\text{CHCl}_3$ ); IR 2997, 1736, 1557.  $^1\text{H}$  NMR ( $\text{CDCl}_3$ , 300 MHz)  $\delta$  8.80 (dd,  $J = 0.6$ ,  $J = 3.6$ , 1H), 7.26-7.20 (m, 1H), 7.07 (dd,  $J = 1.8$ ,  $J = 7.8$ , 1H), 6.94-6.84 (m, 2H), 5.62 (s, 1H), 5.19 (d,  $J = 3.6$ , 1H), 4.37-4.19 (m, 3H), 3.89 (s, 3H), 2.47 (s, 3H), 1.36 (t,  $J = 7.2$ , 3H);  $^{13}\text{C}$  NMR ( $\text{CDCl}_3$ , 100.6 MHz)  $\delta$  171.4, 166.2, 156.9, 156.2, 151.8, 129.6, 128.6, 127.5, 124.7, 120.8, 111.0, 101.1, 67.8, 62.0, 55.3, 44.5, 14.2, 12.4. HRMS found: $[\text{M}-\text{H}]^-$  372.1206,  $\text{C}_{18}\text{H}_{18}\text{BrN}_3\text{O}_6$ , requires: 372.1196;  $m/z$ : 372 (100%,  $[\text{M}-\text{H}]^-$ ).

**(2*S*,3*S*)-ethyl 3-(4-fluorophenyl)-4-(3-methyl-4-nitroisoxazol-5-yl)-2,3-dihydro-1*H*-pyrrole-2-carboxylate (4e).**

Following the general procedure the product was purified on silica gel (ethyl ether/petroleum ether 1:1) and the title compound was obtained in 91% yield as yellow oil. The *ee* of the product was determined by HPLC using a Chiralpak AD-H column (*n*-hexane/*i*PrOH 80:20, flow rate 0.5 mL/min,  $t_{\text{maj}} = 18.6$  min,  $t_{\text{min}} = 29.6$  min, 88% *ee*).  $[\alpha]_{\text{D}}^{20} = + 79$  ( $c = 0.77$  in  $\text{CHCl}_3$ ); IR 2988, 1741, 1542.  $^1\text{H}$  NMR ( $\text{CDCl}_3$ , 400 MHz)  $\delta$  8.65 (s, 1H), 7.23-7.20 (m, 2H), 6.95-6.91 (m, 2H), 5.54 (s, 1H), 4.72 (d,  $J = 3.6$ , 1H), 4.28 (d,  $J = 3.6$ , 1H), 4.27-4.19 (m, 2H), 2.39 (s, 3H), 1.29 (t,  $J = 6.8$ , 3H);  $^{13}\text{C}$  NMR ( $\text{CDCl}_3$ , 100.6MHz)  $\delta$  171.2, 156.4, 150.9, 138.3, 128.6, 128.5, 116.0, 115.8, 102.5, 68.6, 62.4, 49.9, 29.7, 14.2, 12.3; HRMS found: $[\text{M}-\text{H}]^-$  360.1003,  $\text{C}_{17}\text{H}_{15}\text{FN}_3\text{O}_5$ , requires: 360.0996;  $m/z$ : 360 (100%,  $[\text{M}-\text{H}]^-$ ).

**(2*S*,3*S*)-ethyl 3-(furan-2-yl)-4-(3-methyl-4-nitroisoxazol-5-yl)-2,3-dihydro-1*H*-pyrrole-2-carboxylate (4f).**

Following the general procedure the product was purified on silica gel (ethyl ether/petroleum ether 1:1) and the title compound was obtained in 88% yield as yellow oil. The *ee* of the product was determined by HPLC using a Chiralpak AD-H column (*n*-hexane/*i*PrOH 80:20, flow rate 0.5 mL/min,  $t_{\text{maj}} = 21.3$  min,  $t_{\text{min}} = 23.5$  min, 90% *ee*).  $[\alpha]_{\text{D}}^{20} = + 65$  ( $c = 1.22$  in  $\text{CHCl}_3$ ); IR 2980, 1737, 1550.  $^1\text{H}$  NMR ( $\text{CDCl}_3$ , 400 MHz)  $\delta$  8.59 (s, 1H), 7.26 (dd,  $J = 1.6$ ,  $J = 0.8$ , 1H), 6.22 (dd,  $J = 3.2$ ,  $J = 1.6$ , 1H), 6.10 (d,  $J = 3.2$ , 1H), 5.57 (s, 1H), 4.90 (d,  $J = 3.6$ , 1H), 4.52 (d,  $J = 4.0$ , 1H), 4.27-4.19 (m, 2H), 2.43 (s, 3H), 1.28 (t, 7.2, 3H);  $^{13}\text{C}$  NMR ( $\text{CDCl}_3$ , 100.6 MHz)  $\delta$  170.9, 165.9, 156.4, 153.5, 151.1, 142.1, 110.6, 106.7, 99.4, 65.4, 62.5, 44.0, 29.7, 14.2, 12.4, HRMS found: $[\text{M}-\text{H}]^-$  372.1203,  $\text{C}_{18}\text{H}_{18}\text{N}_3\text{O}_6$ , requires: 372.1196;  $m/z$ : 372 (100%,  $[\text{M}-\text{H}]^-$ ).

**(2*S*,3*S*)-ethyl 3-(4-methoxyphenyl)-4-(3-methyl-4-nitroisoxazol-5-yl)-2,3-dihydro-1*H*-pyrrole-2-carboxylate (4g).**

Following the general procedure the product was purified on silica gel (ethyl ether/petroleum ether 1:1) and the title compound was obtained in 89% yield as yellow oil. The *ee* of the product was determined by HPLC using a Chiralpak AD-H column (*n*-hexane/*i*PrOH 80:20, flow rate 0.5 mL/min,  $t_{\text{maj}} = 23.4$  min,  $t_{\text{min}} = 33.4$  min, 89% *ee*).  $[\alpha]_{\text{D}}^{20} = + 93$  ( $c = 0.47$  in  $\text{CHCl}_3$ ); IR 2997, 1743, 1546.  $^1\text{H}$  NMR ( $\text{CDCl}_3$ , 300 MHz)  $\delta$  8.71 (d,  $J = 3.3$ , 1H), 7.25-7.23 (m,  $J = 3.0$ ,  $J = 2.1$ , 1H), 7.21 (m,  $J = 2.1$ ,  $J = 3.0$ , 1H), 6.85-6.84 (m,  $J = 3.0$ ,  $J = 2.1$ , 1H), 6.82-6.81 (m,  $J = 3.0$ ,  $J = 2.1$ , 1H), 5.60 (d,  $J = 2.7$ , 1H), 4.36 (d,  $J = 3.9$ , 1H), 4.33-4.23 (m, 2H), 3.77 (s, 3H), 2.45 (s, 3H), 1.34 (t,

$J=7.2$ , 3H);  $^{13}\text{C}$  NMR ( $\text{CDCl}_3$ , 100.6 MHz)  $\delta$  171.4, 166.1, 158.9, 156.3, 150.8, 134.6, 114.3, 102.9, 68.7, 62.3, 55.3, 49.9, 14.2, 12.4. HRMS found: $[\text{M}-\text{H}]^-$  372.1206,  $\text{C}_{18}\text{H}_{18}\text{N}_3\text{O}_6$ , requires: 372.1196;  $m/z$ : 372 (100%,  $:[\text{M}-\text{H}]^-$ ).

**(2*S*,3*S*)-ethyl 4-(3-methyl-4-nitroisoxazol-5-yl)-3-*m*-tolyl-2,3-dihydro-1*H*-pyrrole-2-carboxylate (4h)**

Following the general procedure the product was purified on silica gel (ethyl ether/petroleum ether 1:1) and the title compound was obtained in 84% yield as yellow oil. The *ee* of the product was determined by HPLC using a Chiralpak AD-H column (*n*-hexane/*i*PrOH 80:20, flow rate 0.5 mL/min,  $t_{\text{maj}} = 17.6$  min,  $t_{\text{min}} = 30.9$  min, 94% *ee*).  $[\alpha]_{\text{D}}^{20} = + 78$  ( $c = 0.71$  in  $\text{CHCl}_3$ ); IR 2990, 1742, 1551.  $^1\text{H}$  NMR ( $\text{CDCl}_3$ , 400 MHz)  $\delta$  8.67 (s, 1H), 7.14-7.10 (m, 1H), 7.04-7.03 (m, 2H), 6.98 (d,  $J = 7.6$ , 1H), 5.32 (s, 1H), 4.68 (d,  $J = 3.6$ , 1H), 4.31 (d,  $J = 4.0$ , 1H), 4.27-4.18 (m, 2H), 2.39 (s, 3H), 2.25 (s, 3H), 1.28 (t,  $J = 7.2$ , 3H);  $^{13}\text{C}$  NMR ( $\text{CDCl}_3$ , 100.6 MHz)  $\delta$  151.0, 128.9, 128.3, 127.5, 123.9, 68.7, 65.9, 62.3, 50.5, 29.7, 22.4, 21.5, 15.3, 14.2, 14.1, 12.4. HRMS found: $[\text{M}-\text{H}]^-$  356.1253,  $\text{C}_{18}\text{H}_{18}\text{N}_3\text{O}_5$ , requires: 356.1246;  $m/z$ : 356 (100%,  $[\text{M}-\text{H}]^-$ ).

**(2*S*,3*S*)-ethyl 4-(3-methyl-4-nitroisoxazol-5-yl)-3-(4-nitrophenyl)-2,3-dihydro-1*H*-pyrrole-2-carboxylate (4i).**

Following the general procedure the product was purified on silica gel (ethyl ether/petroleum ether 1:1) the title compound was obtained in 79% yield as yellow oil. The *ee* of the product was determined by HPLC using a Chiralpak AD-H column (*n*-hexane/*i*PrOH 80:20, flow rate 0.5 mL/min,  $t_{\text{maj}} = 39.3$  min,  $t_{\text{min}} = 45.9$  min, 88% *ee*).  $[\alpha]_{\text{D}}^{20} = + 87$  ( $c = 0.75$  in  $\text{CHCl}_3$ ); IR 2994,

1742, 1545. <sup>1</sup>H NMR (CDCl<sub>3</sub>, 300 MHz) δ 8.74 (s, 1H), 8.20 (t, J=2.4, J=1.8, 2H), 8.17 (t, J=2.1, J=2.4, 2H), 5.68 (s, 1H), 4.92 (d, J=4.2, 1H), 4.37 (d, J=4.2, 1H), 4.38-4.27 (m, 2H), 2.46 (s, 3H), 1.368 (t, J=6.9, 3H); <sup>13</sup>C NMR (CDCl<sub>3</sub>, 75.4 MHz) δ 170.7, 165.7, 156.7, 151.3, 149.7, 147.6, 128.2, 124.6, 101.7, 68.2, 63.0, 50.5, 14.4, 12.5. HRMS found:[M-H]<sup>-</sup> 387.0938, C<sub>17</sub>H<sub>15</sub>N<sub>4</sub>O<sub>7</sub>, requires: 387.0941; m/z: 387 (100%, [M-H]<sup>-</sup>).

**(2*S*,3*R*)-3-(2,3-Dichloro-phenyl)-4-(3-methyl-4-nitro-isoxazol-5-yl)-2,3-dihydro-1H-pyrrole-2-carboxylic acid ethyl ester (4j).**

Following the general procedure the product was purified on silica gel (ethyl ether/petroleum ether 1:1) and the title compound was obtained in 91% yield as yellow oil. The *ee* of the product was determined by HPLC using a Chiralpak AD-H column (*n*-hexane/*i*PrOH 80:20, flow rate 0.5 mL/min, *t*<sub>maj</sub> = 18.7 min, *t*<sub>min</sub> = 20.7 min, 88% *ee*). [ $\alpha$ ]<sub>D</sub><sup>20</sup> = + 34 (c = 0.25 in CHCl<sub>3</sub>); IR 2992, 1738, 1541. <sup>1</sup>H NMR (CDCl<sub>3</sub>, 400 MHz) δ 8.72 (d, J= 2.4, 1H), 7.31 (dd, J= 8, J= 1.6, 1H), 7.06 (t, J= 7.6, 1H), 6.99-6.96 (m, 1H), 5.55 (s, 1H), 4.24 (m, 4H), 2.40 (s, 3H), 1.29 (t, J= 7.2, 3H); <sup>13</sup>C NMR (CDCl<sub>3</sub>, 100.6 MHz) δ 170.6, 165.6, 151.7, 129.7, 127.7, 62.5, 53.4, 29.7, 14.1, 12.3; HRMS found:[M-H]<sup>-</sup> 410.0308, C<sub>17</sub>H<sub>14</sub>Cl<sub>2</sub>N<sub>3</sub>O<sub>5</sub>, requires: 410.0311; m/z: 410 (100%, [M-H]<sup>-</sup>).

**(2*S*,3*S*)-4-(3-Methyl-4-nitro-isoxazol-5-yl)-3-naphthalen-2-yl-2,3-dihydro-1H-pyrrole-2-carboxylic acid ethyl ester (4k).**

Following the general procedure the product was purified on silica gel (ethyl ether/petroleum ether 1:1) and the title compound was obtained in 93% yield as yellow oil. The *ee* of the product



was determined by HPLC using a Chiralpak AD-H column (*n*-hexane/*i*PrOH 80:20, flow rate 0.5 mL/min,  $t_{\text{maj}} = 22.8$  min,  $t_{\text{min}} = 33.8$  min, 86% *ee*).  $[\alpha]_{\text{D}}^{20} = + 47$  ( $c = 0.95$  in  $\text{CHCl}_3$ ); IR 2986, 1732, 1549.  $^1\text{H}$  NMR ( $\text{CDCl}_3$ , 300 MHz)  $\delta$  8.73 (s, 1H), 7.75-7.68 (m, 4H), 7.41-7.36 (m, 3H), 5.62 (s, 1H), 4.90 (d,  $J=4$ , 1H), 4.39 (d,  $J=4$ , 1H), 4.32-4.19 (m,  $J=7.2$ , 2H), 2.36 (s, 3H), 1.30 (t,  $J=7.2$ , 3H);  $^{13}\text{C}$  NMR ( $\text{CDCl}_3$ , 100.6 MHz)  $\delta$  171.5, 166.2, 156.5, 151.4, 139.6, 133.5, 132.8, 129.0, 127.9, 127.6, 126.3, 126.0, 125.7, 124.9, 102.7, 68.8, 62.6, 50.8, 29.7, 14.4, 12.6; HRMS found:  $[\text{M-H}]^-$  392.1239,  $\text{C}_{21}\text{H}_{18}\text{N}_3\text{O}_5$ , requires: 392.1249;  $m/z$ : 392 (100%,  $[\text{M-H}]^-$ ).

**(2*S*,3*S*)-ethyl 3-(4-cyanophenyl)-4-(3-methyl-4-nitroisoxazol-5-yl)-2,3-dihydro-1*H*-pyrrole-2-carboxylate (4l).**

Following the general procedure the product was purified on silica gel (ethyl ether/petroleum ether 1:1) and the title compound was obtained in 94% yield as yellow oil. The *ee* of the product was determined by HPLC using a Chiralpak AD-H column (*n*-hexane/*i*PrOH 80:20, flow rate 0.5 mL/min,  $t_{\text{maj}} = 36.4$  min,  $t_{\text{min}} = 46.1$  min, 86% *ee*).  $[\alpha]_{\text{D}}^{20} = + 75$  ( $c = 0.38$  in  $\text{CHCl}_3$ ); IR 2990, 1742, 1540.  $^1\text{H}$  NMR ( $\text{CDCl}_3$ , 400 MHz)  $\delta$  8.67 (s, 1H), 7.56 (d,  $J= 8.0$ , 2H), 7.37 (d,  $J=8.4$ , 2H), 5.69 (s, 1H), 4.79 (d,  $J= 4$ , 1H), 4.28 (d,  $J= 4.4$ , 1H), 4.24 (m, 2H), 2.39 (s, 3H), 1.29 (t,  $J= 7.2$ , 3H);  $^{13}\text{C}$  NMR ( $\text{CDCl}_3$ , 100.6 MHz)  $\delta$  170.6, 165.6, 156.5, 151.3, 147.6, 132.94, 127.9, 111.6, 101.4, 68.1, 62.7, 50.5, 29.7, 14.2, 12.3; HRMS found:  $[\text{M-H}]^-$  367.1040,  $\text{C}_{18}\text{H}_{15}\text{N}_4\text{O}_5$ , requires: 367.1042;  $m/z$ : 367 (100%,  $[\text{M-H}]^-$ ).

**(2*S*,3*S*)-ethyl 3-isobutyl-4-(3-methyl-4-nitroisoxazol-5-yl)-2,3-dihydro-1*H*-pyrrole-2-carboxylate (4m)**

Following the general procedure the product was purified on silica gel (ethyl ether/petroleum ether 1:1) and the title compound was obtained in 89 % yield as yellow solid. The *ee* of the product was determined by HPLC using a Chiralpak AD-H column (*n*-hexane/*i*PrOH 80:20, flow rate 0.5 mL/min,  $t_{\text{maj}} = 13.1$  min,  $t_{\text{min}} = 13.8$  min, 77% *ee*).  $[\alpha]_{\text{D}}^{20} = + 59$  (c = 0.38 in CHCl<sub>3</sub>); IR 2997, 1742, 1545. <sup>1</sup>H NMR (CDCl<sub>3</sub>, 400 MHz)  $\delta$  8.52 (s, 1H), 4.20-4.16 (m, 3H), 3.71-3.63 (m, 2H), 2.50-2.48(m, 1H), 2.47 (s, 3H), 1.82-1.78 (m, 2H), 1.26 (t, J= 7.3, 3H), 1.02 (d, J= 6.8, 3H), 0.91 (d, J= 6.4, 3H); <sup>13</sup>C (CDCl<sub>3</sub>, 100.6 MHz)  $\delta$  172.1, 166.1, 156.5, 151.0, 103.2, 64.7, 62.1, 43.9, 43.0, 25.4, 23.8, 20.9, 14.1, 12.5 ; HRMS found:[M-H]<sup>-</sup> 322.1475, C<sub>18</sub>H<sub>15</sub>N<sub>4</sub>O<sub>5</sub>, requires: 322.1481; *m/z*: 322 (100%, [M-H]<sup>-</sup>).

## 6. Preparation of catalysts 6l and 6m

### *N*-(3,5-bis(trifluoromethyl)benzyl) cinchonidinium bromide (6l).

Following the procedure used for 6l, the title compound was obtained as a brown solid in 70% yield. Spectral data were consistent with the literature.<sup>1</sup>

### *N*-3,5-Bis(*tert*-butylbenzyl)cinchonidinium bromide (6m)

To a stirred suspension of cinchonidine (1.0 mmol) in THF (3.0 mL), 3,5-bis(trifluoromethyl)benzyl bromide (1.3 mmol) was added. The resulting mixture was then heated at 60°C, and stirred for 36h at the same temperature. After cooling to rt, the precipitate was collected by Büchner filtration and washed several times with Et<sub>2</sub>O, affording the title compound as a white solid in 80% yield.  $[\alpha]_D^{25} = -105.5$  (c = 0.80, CHCl<sub>3</sub>)<sup>1</sup>H NMR (CDCl<sub>3</sub>, 400 MHz)  $\delta$  8.86 (d, J= 4.4, 1H), 8.12-8.10 (m, 1H), 7.98 (d, J= 8, 1H), 7.82-7.81 (m, 1H), 7.69 (d, J= 1.6, 2H), 7.66-7.58 (m, 2H), 7.51 (s, 1H), 6.76-6.68 (m, 2H), 5.90-5.87 (m, 1H), 5.60-5.52 (m, 1H), 5.13-5.09 (m, 2H), 5.02 (d, J= 10.4, 1H), 4.92-4.88 (b, 1H), 3.79 (t, J= 8.4, 1H), 3.68-3.62 (m, 1H), 3.49-3.43 (b, 1H), 3.33-3.31 (b, 1H), 2.63 (b, 1H), 2.17-2.12 (b, 2H), 1.99 (s, 1H), 1.67 (b, 1H), 1.33 (s, 18H); <sup>13</sup>C NMR (CDCl<sub>3</sub>, 100.6 MHz)  $\delta$  152.2, 149.5, 147.2, 145.9, 136.5, 129.8, 129.6, 128.3, 127.9, 126.3, 124.8, 124.4, 123.0, 120.2, 117.9, 68.5, 64.6, 63.8, 61.3, 51.6, 38.0, 35.1, 31.47, 26.7, 24.9, 21.7.

## 7. Preparation of pyrrolidines 7-9

### Preparation of (2*S*,3*R*)-ethyl 4-(3-methyl-4-nitroisoxazol-5-yl)-3-phenylpyrrolidine-2-carboxylate (7).

To a solution of 4a (34 mg, 0.1 mmol) in TFA (950  $\mu$ L), Et<sub>3</sub>SiH (199  $\mu$ L, 1.25 mmol) was added. The solution was stirred for 45 min and a solution of NaHCO<sub>3</sub> sat. (3 mL) was added at -78°C. The solution was extracted with EtOAc (3 X 3 mL) and under reduced pressure. Water was added to the yellow oil and extracted with CH<sub>2</sub>Cl<sub>2</sub> (5 X 2 mL). The organic layer was dried over Na<sub>2</sub>SO<sub>4</sub> and concentrated under reduced pressure. The crude product was purified by flash chromatography (eluent petroleum ether:EtOAc 10:8) to give 7 as yellow oil in 73% yield. R<sub>f</sub> 0.36 in petroleum ether:EtOAc 1:1; IR 2975, 1763, 1522; <sup>1</sup>H NMR (CDCl<sub>3</sub>, 400 MHz)  $\delta$  7.27-7.17 (m, 5H), 4.47 (q, J= 8.4, 1H), 4.19-4.11 (m, 1H), 4.10-4.02 (m, 1H), 3.96 (d, J= 8, 1H), 3.81 (t, J= 8.8, 1H), 3.67 (t, J= 10, 1H), 3.35 (t, J= 8.8, 1H), 2.81 (s, 1H), 2.43 (s, 3H), 1.105 (t, J= 7.2, 3H); <sup>13</sup>C (CDCl<sub>3</sub>, 100.6 MHz)  $\delta$  173.0, 172.8, 156.0, 138.8, 128.9, 127.7, 127.5, 68.0, 61.5, 54.2, 51.7, 47.1, 29.7, 14.1, 11.6; HRMS found:[M-H]<sup>-</sup> 344.1251, C<sub>17</sub>H<sub>19</sub>N<sub>3</sub>O<sub>5</sub>, requires: 344.1246; *m/z*: 344 (100%, [M-H]<sup>-</sup>).

### Preparation of (2*R*,3*R*)-4-(3-Methyl-4-nitro-isoxazol-5-yl)-3-phenyl-pyrrolidine-1,2-dicarboxylic acid 1-tert-butyl ester 2-ethyl ester (8).

To a solution of 7 (60mg, 0.17mmol) in DCM (1mL) were subsequently added DMAP (12.2mg, 0.10mmol), TEA (140 $\mu$ L, 0.10mmol) and (Boc)<sub>2</sub>O (43.7mg, 0.20mmol) at 0°C. The solution was taken to room temperature and stirred for 90 minutes. The mixture was quenched with NH<sub>4</sub>Cl

saturated solution and extracted with DCM (3x2mL). The organic layer was concentrated under reduced pressure. The crude was purified by flash chromatography (eluent system petroleum ether: diethyl ether 7:3) to give **16** as a light yellow oil in 70% yield.  $R_f$  0.6 in petroleum ether: diethyl ether 1:1;  $^1\text{H}$  NMR ( $\text{CDCl}_3$ , 400 MHz)  $\delta$  (ppm) 7.32-7.20 (m, 5H), 4.62-4.58 (m, 1H), 4.46-4.29 (m, 2H), 4.28-4.19 (m, 1H), 4.15-4.04 (m, 1H), 3.99-3.92 (m, 1H), 3.75 (t,  $J= 10.4$ , 1H), 2.48 (s, 3H), 1, 49-1.43 (m, 9H), 1.25-1.12 (m, 3H).  $^{13}\text{C}$  NMR ( $\text{CDCl}_3$ , 400 MHz)  $\delta$  (ppm) 171.7, 156.3, 153.3, 136.5, 129.4, 129.2, 128.7, 127.8, 127.4, 127.1, 81.5, 66.5, 61.7, 54.0, 50.3, 41.7, 28.7, 27.8, 14.5, 11.8. EI/HRMS:  $[\text{M}^+]$  calcd for  $\text{C}_{22}\text{H}_{27}\text{N}_3\text{O}_7\text{Na}$  468.1747 found 468.1754.

**Preparation (2R,3R)-3-Phenyl-pyrrolidine-1,2,4-tricarboxylic acid 1-tert-butyl ester 2-ethyl ester (9).**

To a solution of **8** (43.3 mg, 0.1mmol) in THF (1mL) at r.t., a solution of  $\text{KMnO}_4$  dissolved in ( $\text{H}_2\text{O}$ /dioxane, 3.5:1) was added drop wise over 30 minutes. The reaction was left stirring for 60 minutes at room temperature. After this time, a saturated solution of  $\text{Na}_2\text{SO}_3$  was added and HCl 6N solution until clearance. The mixture was extracted with EtOAc (3x2mL). The organic layer was concentrated under reduced pressure. The crude was purified by flash chromatography (eluent system DCM:MeOH 99:1) to give **5** as a yellow solid in 87% yield.  $R_f$  0.22 in DCM:MeOH, 98:2;  $^1\text{H}$  NMR ( $\text{CDCl}_3$ , 400 MHz)  $\delta$  (ppm) 7.33-7.22 (m, 5H), 4.36-4.14 (m, 2H), 4.12-3.98 (m, 2H), 3.78-3.72 (m, 2H), 3.36 (q,  $J= 8.4$ , 1H), 1.50-1.38 (m, 9H), 1.18-1.11 (m, 3H)  $^{13}\text{C}$  NMR ( $\text{CDCl}_3$ , 400 MHz)  $\delta$  (ppm) 176.3, 172.0, 153.7, 139.0, 128.2, 127.7, 81.3, 66.6, 61.5, 52.8, 49.2, 28.7, 14.5. EI/HRMS:  $[\text{M}^+]$  calculated for  $\text{C}_{19}\text{H}_{25}\text{N}\text{O}_6\text{Na}$ . 386.1580 found 386.1572.

# 8. Spectra and HPLC of compounds 3a-m, 4a-m and 7-9

## Catalyst 6m

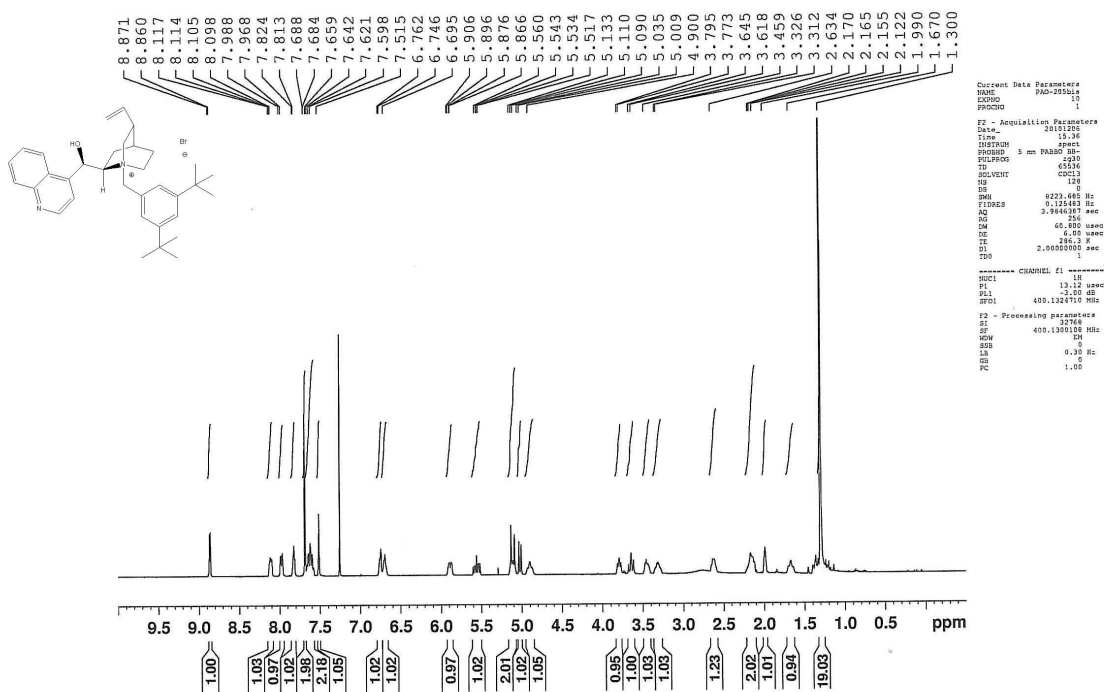

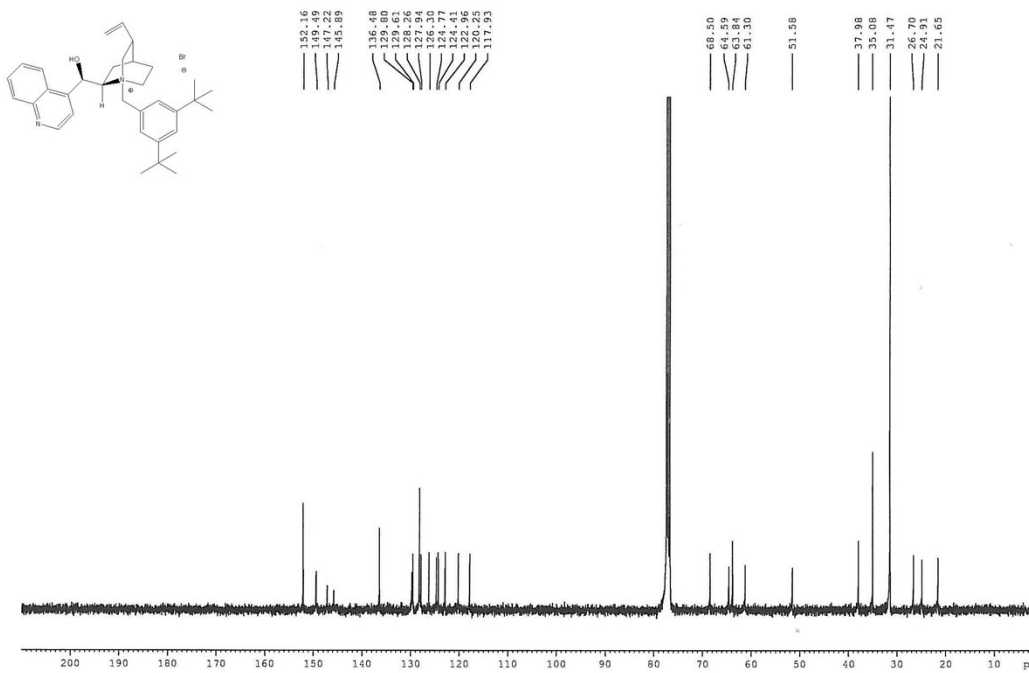

**Catalyst 6I**

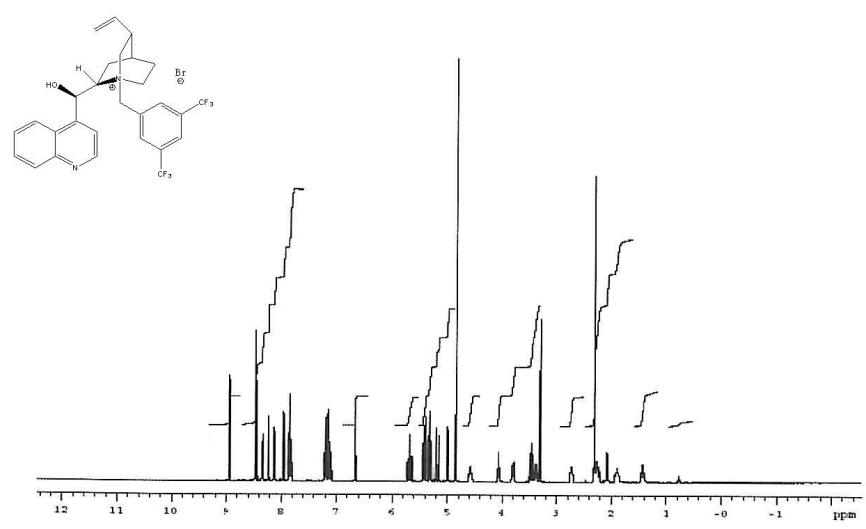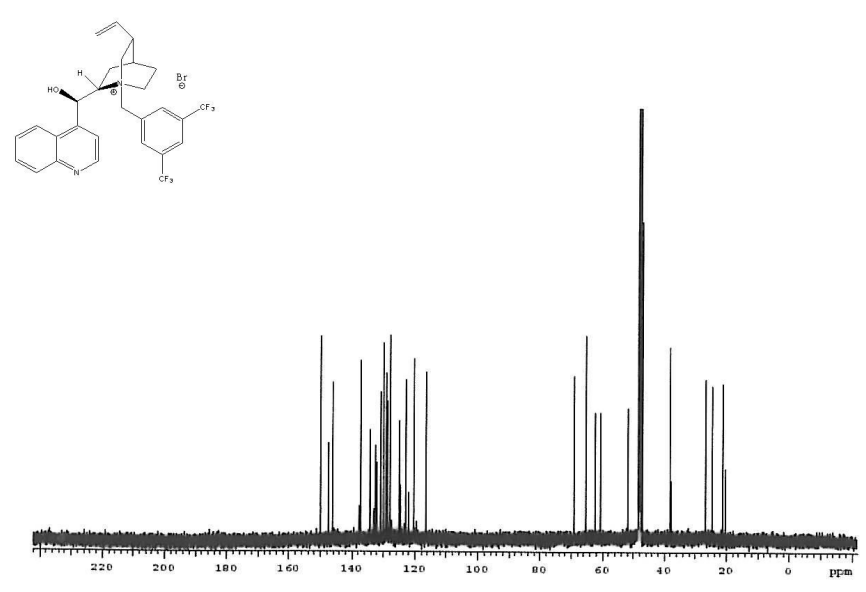



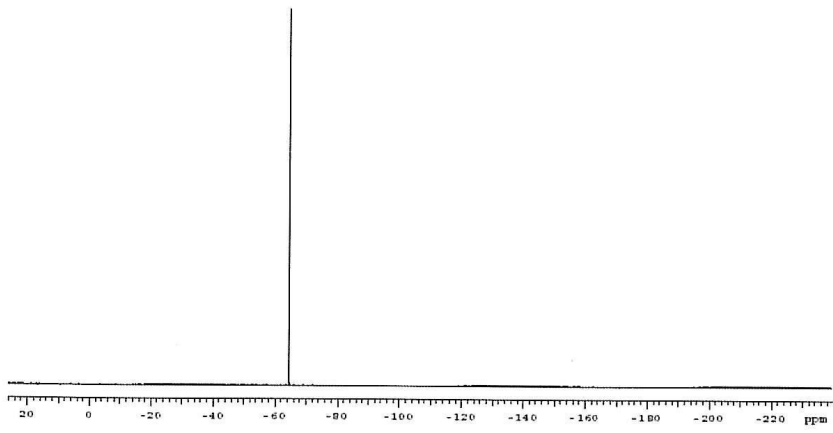

**Compound 3a**

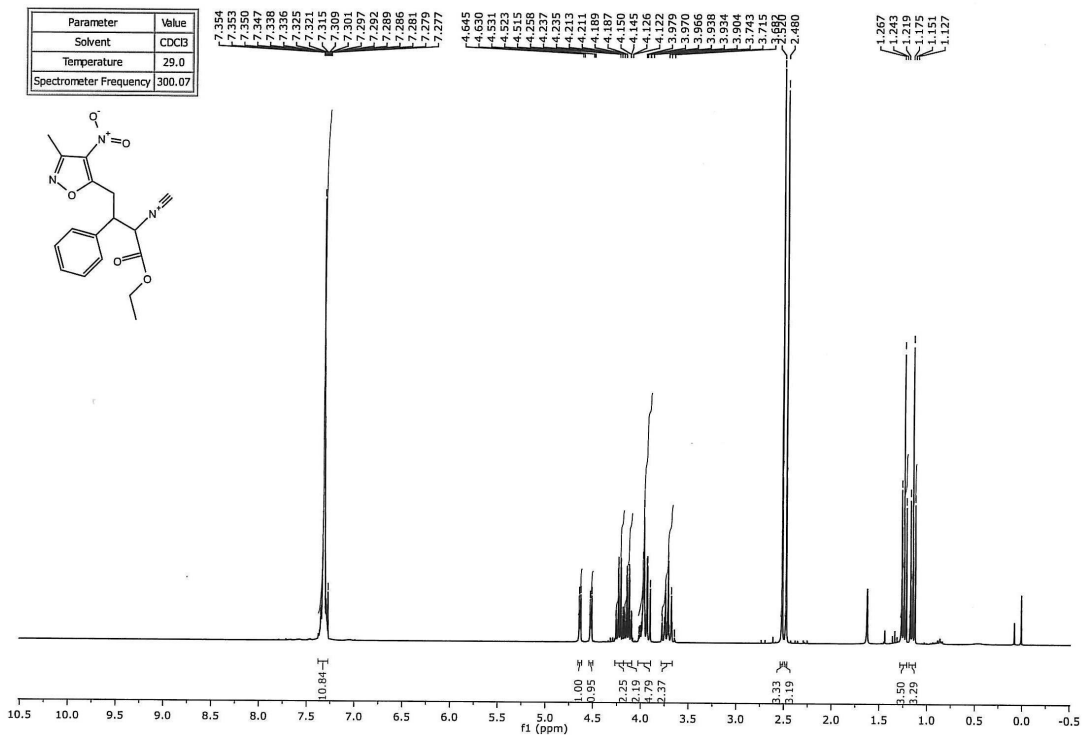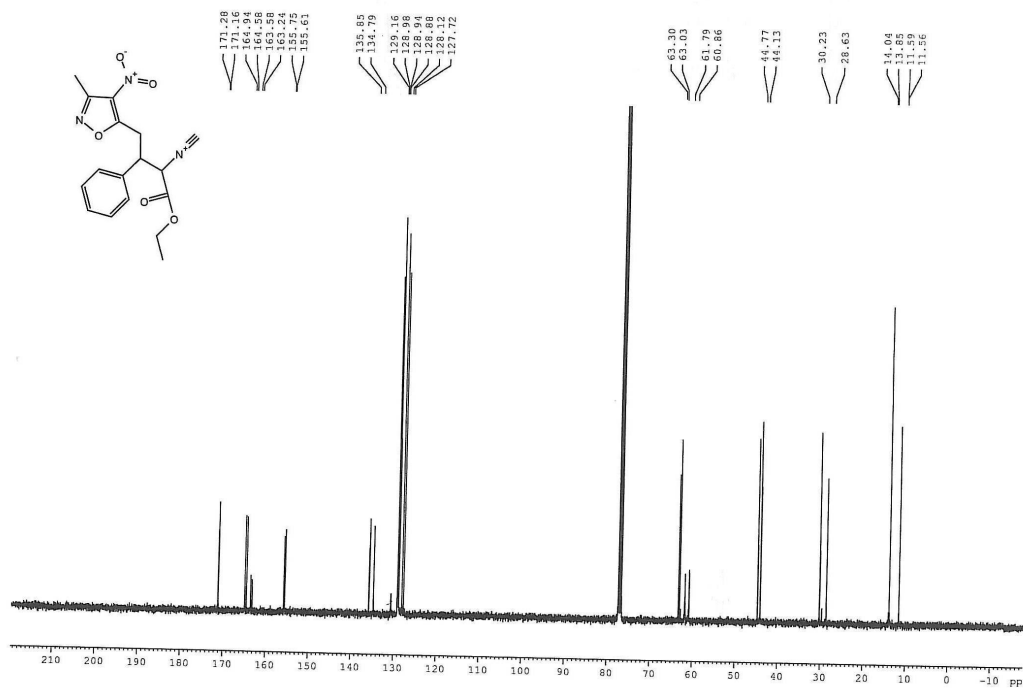

Compound 4a

|                        |                   |
|------------------------|-------------------|
| Parameter              | Value             |
| Solvent                | CDCl <sub>3</sub> |
| Temperature            | 29.0              |
| Spectrometer Frequency | 300.07            |

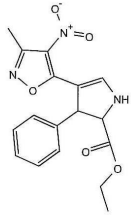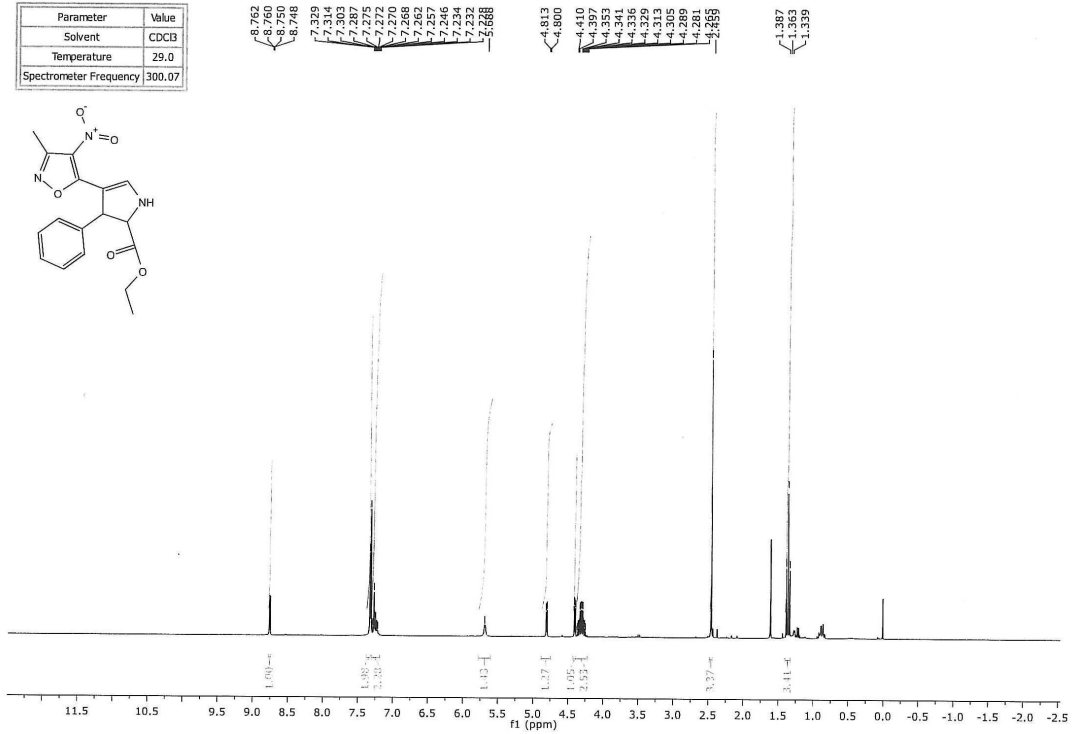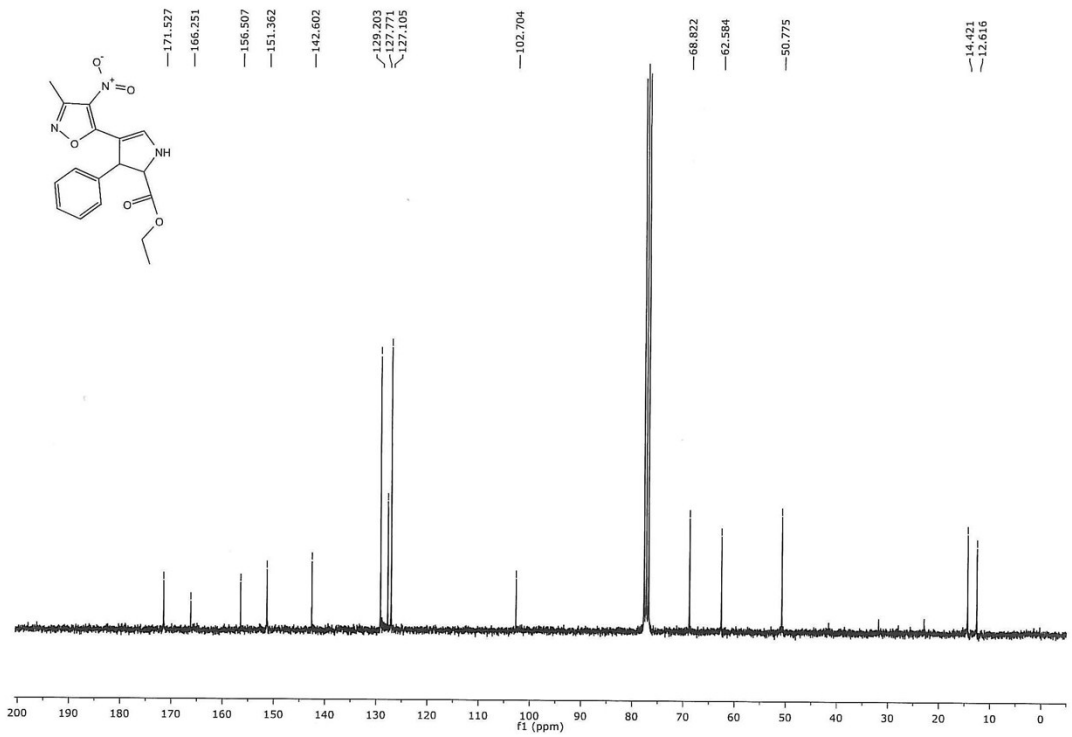

## SAMPLE INFORMATION

|                                                                                                                                                          |                                                                                                                                                                                                                                       |
|----------------------------------------------------------------------------------------------------------------------------------------------------------|---------------------------------------------------------------------------------------------------------------------------------------------------------------------------------------------------------------------------------------|
| Sample Name: PAO-racemo<br>Sample Type: Unknown<br>Vial: 1<br>Injection #: 1<br>Injection Volume: 10.00 ul<br>Run Time: 45.0 Minutes<br>Sample Set Name: | Acquired By: System<br>Date Acquired: 6/23/10 12:07:48 PM<br>Acq. Method Set: Chiralmiscela<br>Date Processed: 6/23/10 1:19:02 PM<br>Processing Method: HPLC<br>Channel Name: PDA Single 254.0 nm<br>Proc. Chnl. Descr.: PDA 254.0 nm |
|----------------------------------------------------------------------------------------------------------------------------------------------------------|---------------------------------------------------------------------------------------------------------------------------------------------------------------------------------------------------------------------------------------|

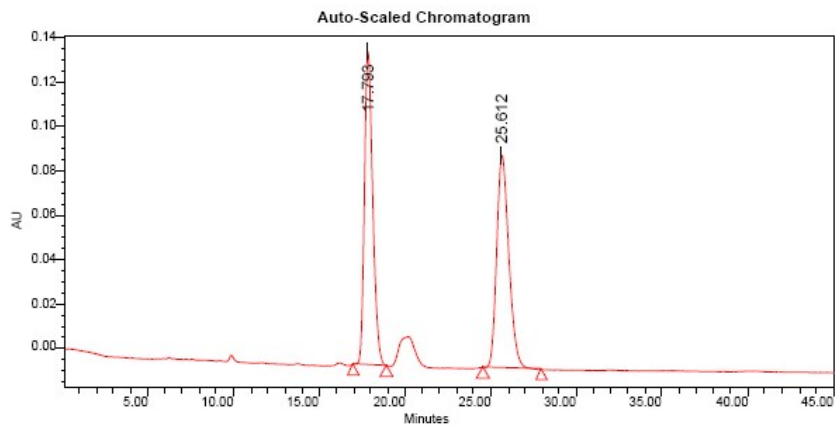

**Unknown Peak Results**

| Peak Type | RT     | Area    | % Area | Height |
|-----------|--------|---------|--------|--------|
| 1 Unknown | 17.793 | 4752780 | 50.19  | 141051 |
| 2 Unknown | 25.612 | 4716972 | 49.81  | 95737  |

**Compound 4a**

### Area % Report

Data File: C:\EZChrom Elite\Enterprise\Projects\Default\Data\DS209.PAO2-7-2012 1-34-15 PM\System.dat  
 Method: C:\EZChrom Elite\Enterprise\Projects\Default\Method\untitled.met  
 Acquired: 2/7/2012 1:35:36 PM  
 Printed: 2/7/2012 3:18:29 PM

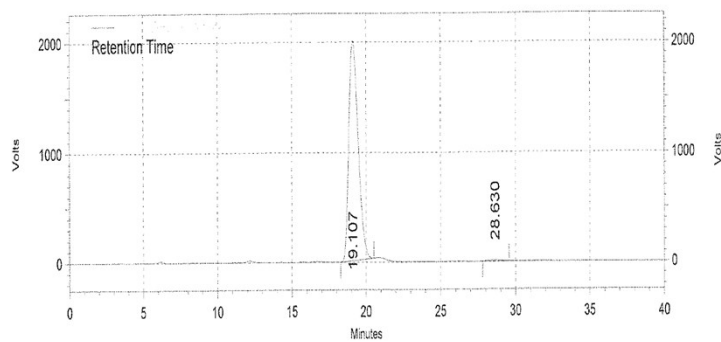

VWD: Signal A,  
 210 nm Results

| Retention Time | Area       | Area % | Height   | Height % |
|----------------|------------|--------|----------|----------|
| 19.107         | 1466779202 | 99.26  | 33442472 | 99.42    |
| 28.630         | 10876711   | 0.74   | 195753   | 0.58     |

|        |            |        |          |        |
|--------|------------|--------|----------|--------|
| Totals | 1477655913 | 100.00 | 33638225 | 100.00 |
|--------|------------|--------|----------|--------|

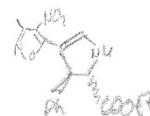

# Compound 3b

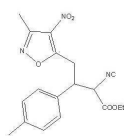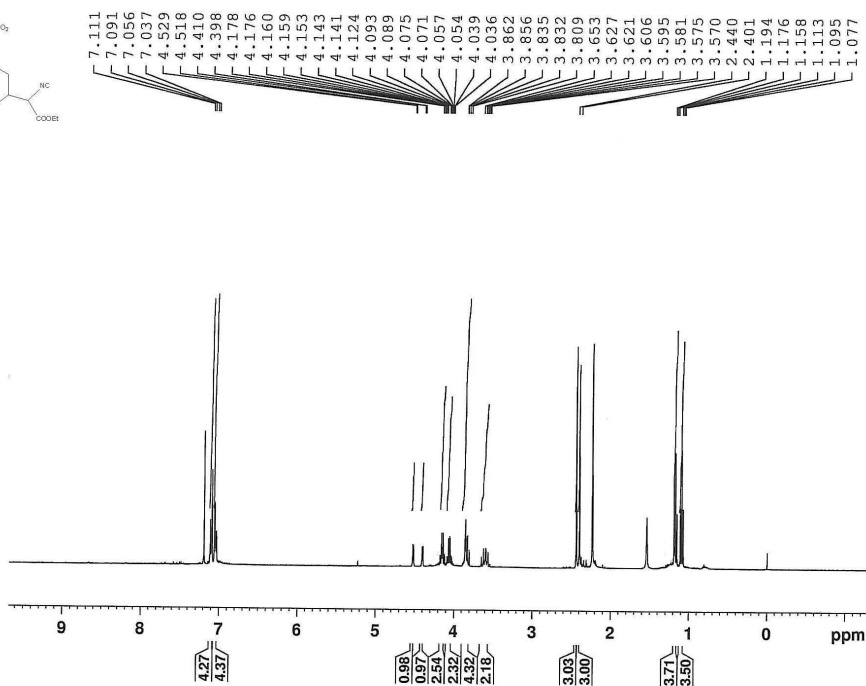

Current Data Parameters  
 NAME Aug21-2018  
 PRONO 70  
 PROCNO 1

F2 - Acquisition Parameters  
 Date\_ 20100921  
 Time 16:16  
 INSTRUM spect  
 PROBNM 5 mm PABBO QNP  
 PULPROG zgpg30  
 TD 65534  
 SOLVENT CDCl3  
 NS 16  
 DS 4  
 RB 8223.685 Hz  
 FIDRES 0.126480 Hz  
 AQ 3.848627 sec  
 RU 32  
 DW 60.800 usec  
 DE 19.00 usec  
 TE 295.1 K  
 D1 1.0000000 sec  
 TDS

----- CHANNEL f1 -----  
 NUC1 13  
 P1 13.12 usec  
 PL1 -3.20 dB  
 SFO1 400.1324710 MHz

F2 - Processing parameters  
 SI 32768  
 SF 400.1300361 MHz  
 DS 4  
 SWH 4000.000000 MHz  
 GB 0.30 Hz  
 RB 45.82 Hz  
 PC 3.00

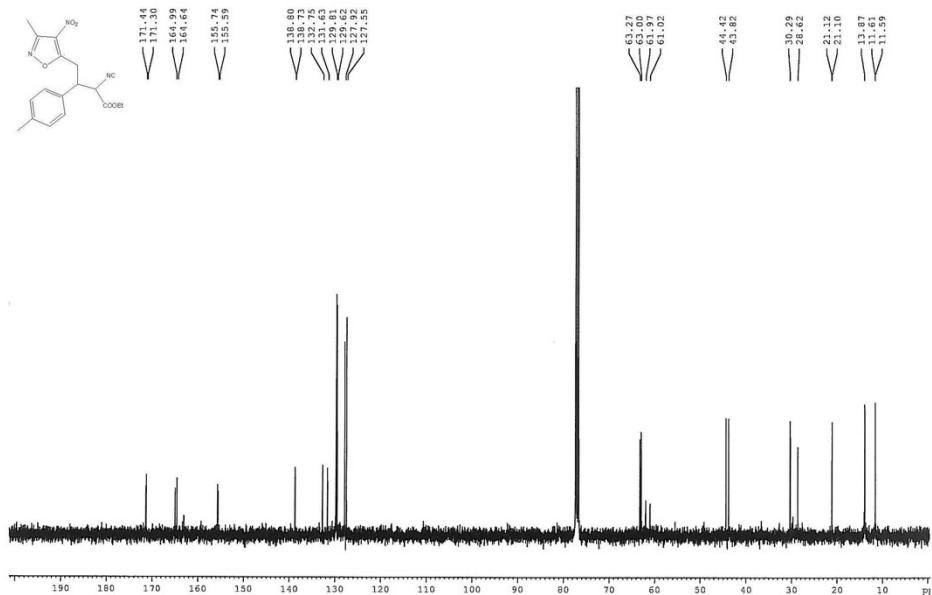

Compound 4b

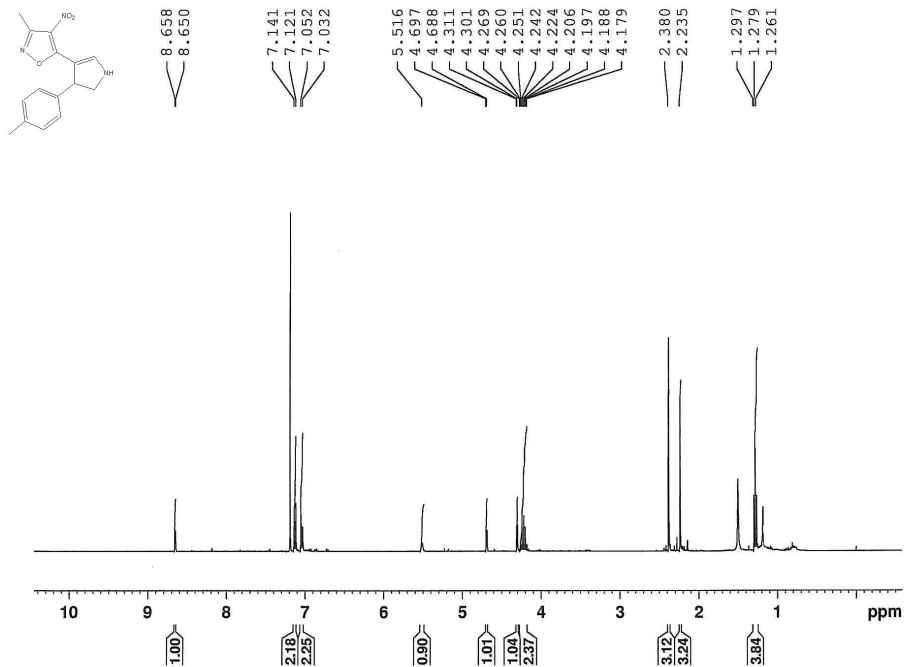

```

Current Data Parameters
NAME      Jul04-2010
EXPNO    2
PROCNO   1
F2 - Acquisition Parameters
Date_    20100704
Time     14.28
INSTRUM  spect
PROBHD   5 mm PABBO DQ-
PULPROG  zgpg30
TD        65536
SOLVENT  CDCl3
NS        16
DS        2
SWH       8233.645 Hz
FIDRES    0.1221683 Hz
AQ         3.9844367 sec
RG         640
DM         60.800 uM
DE         1.00 uM
TE         295.0 K
D1         1.0000000 sec
TDD        1
----- CHANNEL f1 -----
NUC1       13
P1         13.12 uM
PL1        -1.00 dB
SFO1       400.1324710 MHz
F2 - Processing parameters
SI         32768
SF         400.1350364 MHz
WDW        EM
SSB        0
LB         0.30 Hz
GB         0
PC         1.00
    
```

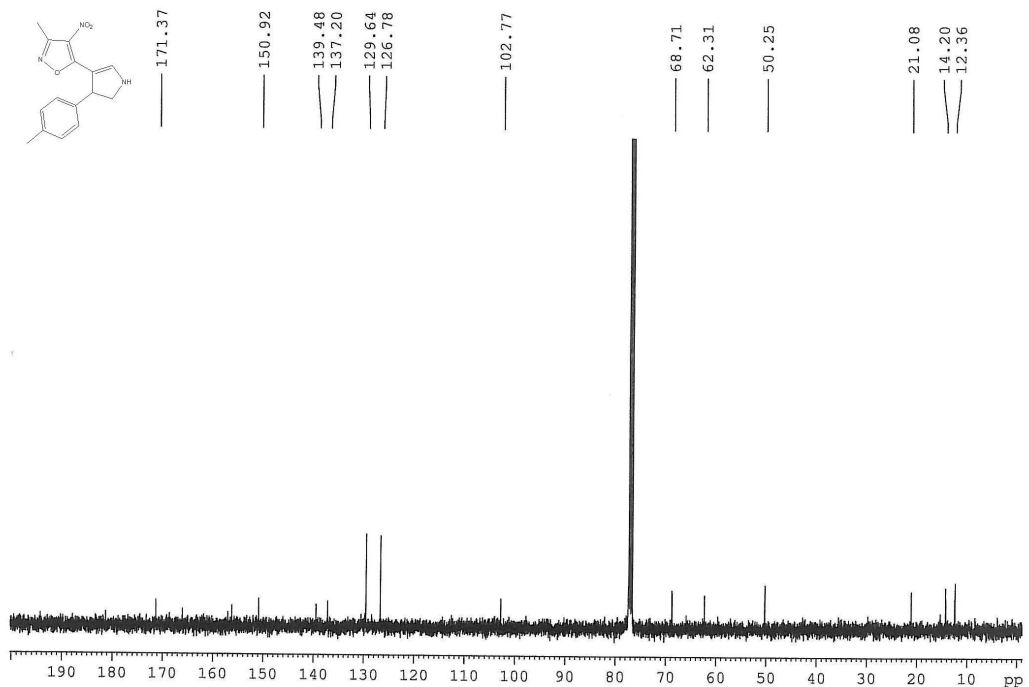

# DEFAULT REPORT

| Peak # | Component Name | Time [min] | Area [uV*sec] | Height [uV] | Area [%] | Norm. Area [%] | Cal. Range | Volt Range | BL  | Raw Amount | Adjusted Amount |
|--------|----------------|------------|---------------|-------------|----------|----------------|------------|------------|-----|------------|-----------------|
| 1      |                | 18.773     | 598529.70     | 18485.47    | 53.95    | 53.95          |            |            | *MM | 0.5985     | 0.5985          |
| 2      |                | 24.875     | 509132.54     | 11395.26    | 46.05    | 46.05          |            |            | *MM | 0.5091     | 0.5091          |
|        |                |            | 1105662.24    | 29880.73    | 100.00   | 100.00         |            |            |     | 1.1057     | 1.1057          |

Missing Component Report  
Component Expected Retention (Calibration File)

All components were found

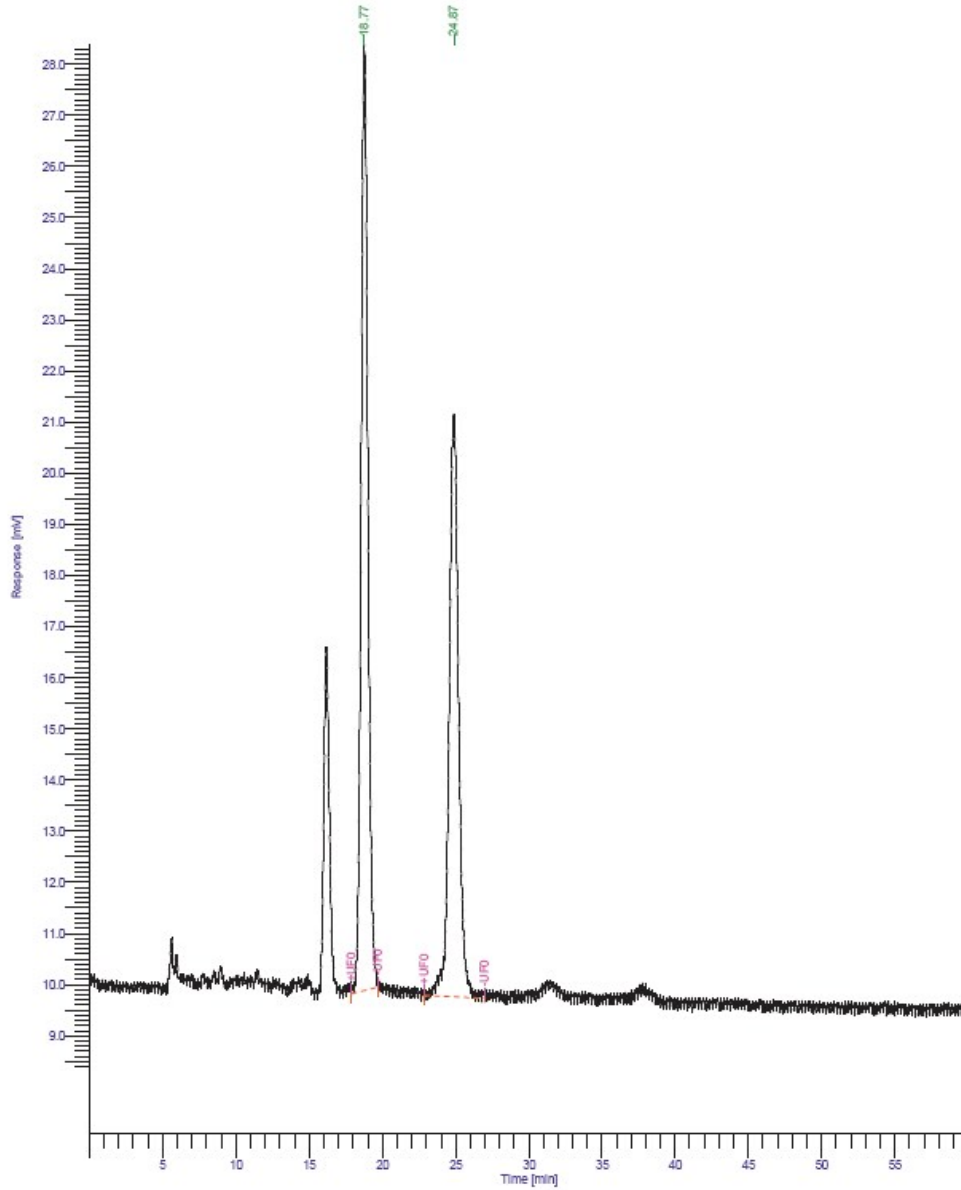



# Compound 4b

## DEFAULT REPORT

| Peak # | Component Name | Time [min] | Area [uV*sec] | Height [uV] | Area [%] | Norm. Area [%] | Cal. Range | Volt Range | BL  | Raw Amount | Adjusted Amount |
|--------|----------------|------------|---------------|-------------|----------|----------------|------------|------------|-----|------------|-----------------|
| 1      |                | 19.463     | 14140770.84   | 400803.08   | 96.34    | 96.34          |            |            | *MM | 14.1408    | 14.1408         |
| 2      |                | 28.979     | 536478.70     | 11150.75    | 3.66     | 3.66           |            |            | *MM | 0.5365     | 0.5365          |
|        |                |            | 14677247.54   | 411953.83   | 100.00   | 100.00         |            |            |     | 14.6772    | 14.6772         |

Missing Component Report  
Component Expected Retention (Calibration File)

All components were found

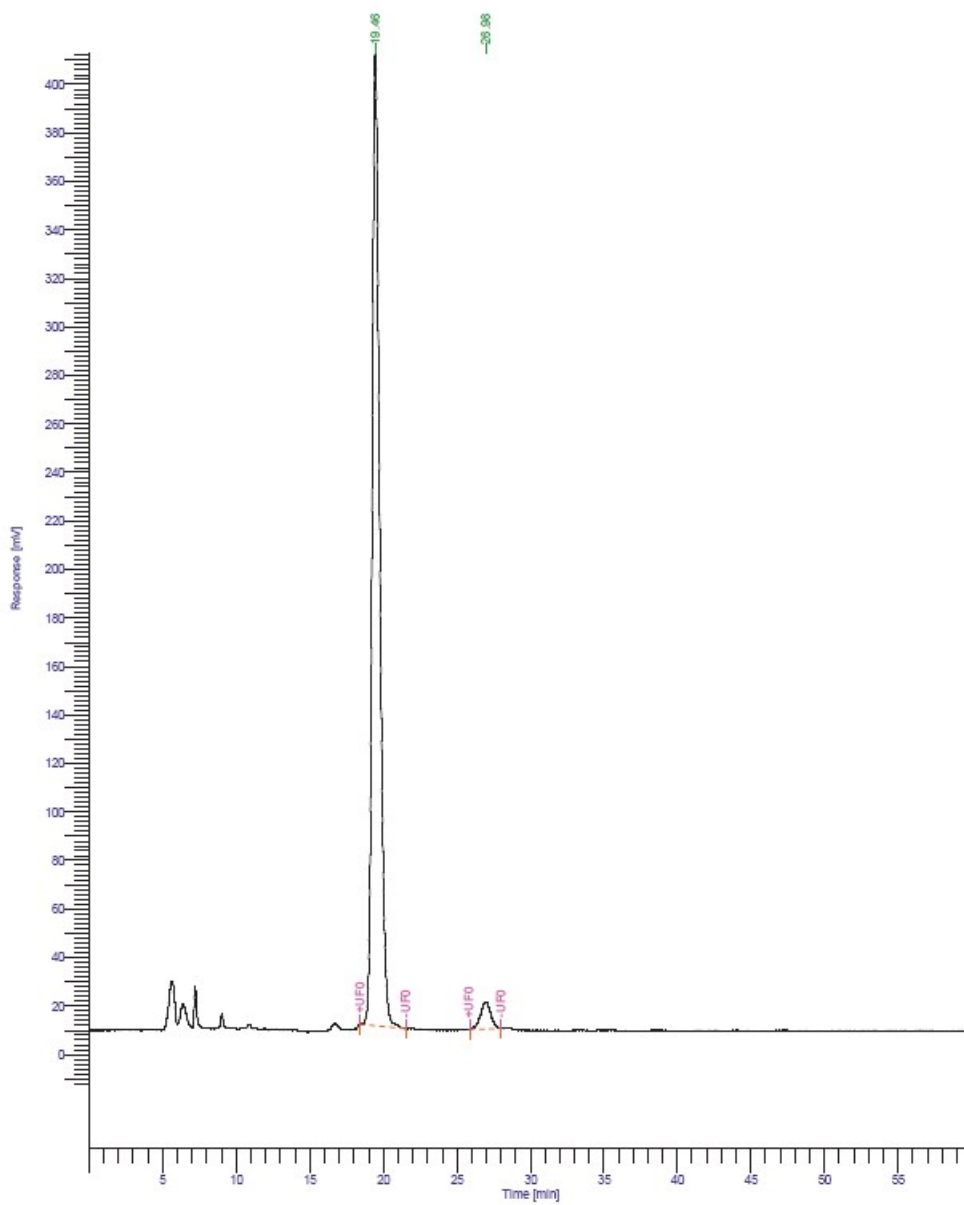

Compound 3c

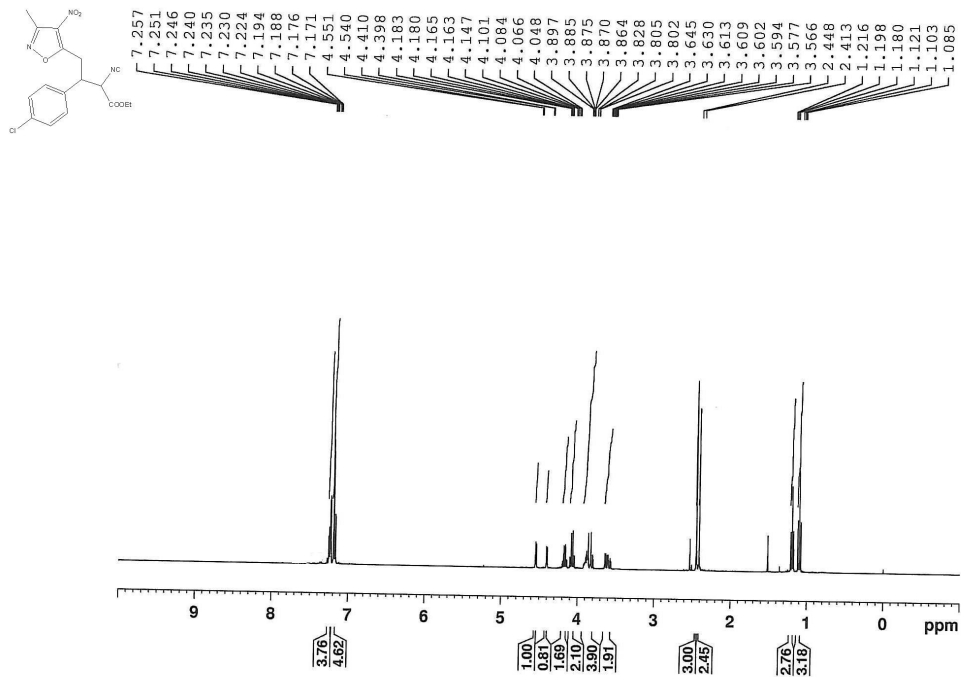

Current Data Parameters  
 NAME PAO-261  
 EXPNO 12  
 PROCNO 12

F2 - Acquisition Parameters  
 Date\_ 20100901  
 Time 22:10  
 INSTRUM spect  
 PROCNO 5  
 PULPROG zgpg30  
 ID 6054  
 SOLVENT cdcl3  
 NS 128  
 DS 0  
 SWE 8233.458 Hz  
 FIDRES 0.103483 Hz  
 AQ 1.2846297 sec  
 RG 266  
 GM 62.800 usec  
 DE 6.00 usec  
 TE 295.2 K  
 DQ 2.0000000 sec  
 TD 1

----- CHANNEL f1 -----  
 NUC1 1H  
 PL 13.12 usec  
 FL1 -1.00 dB  
 SFO1 400.1324710 MHz

F2 - Processing parameters  
 SI 32768  
 SF 400.1303357 MHz  
 MSB 0  
 SSB 0  
 LB 0.38 Hz  
 GB 0  
 PC 1.00

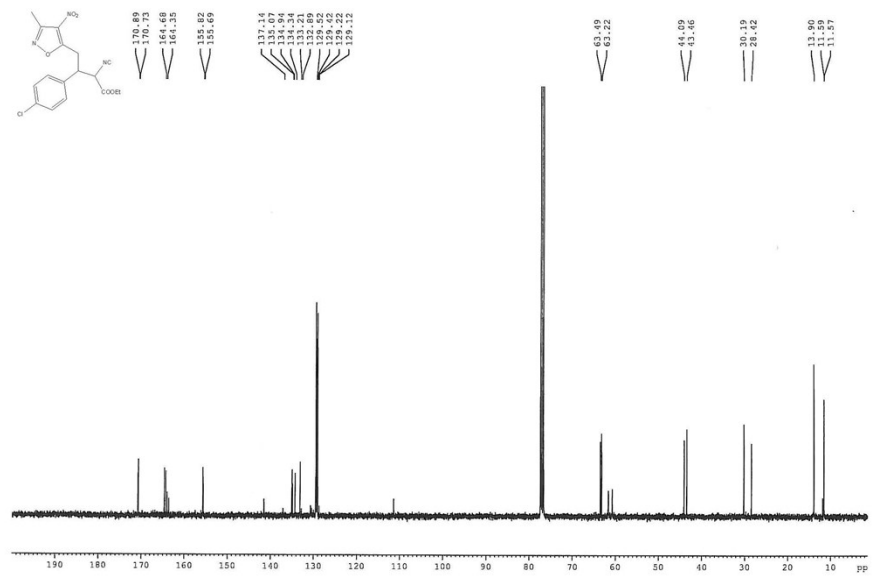

# Compound 4c

|                        |                   |
|------------------------|-------------------|
| Parameter              | Value             |
| Solvent                | CDCl <sub>3</sub> |
| Temperature            | 29.0              |
| Spectrometer Frequency | 300.07            |

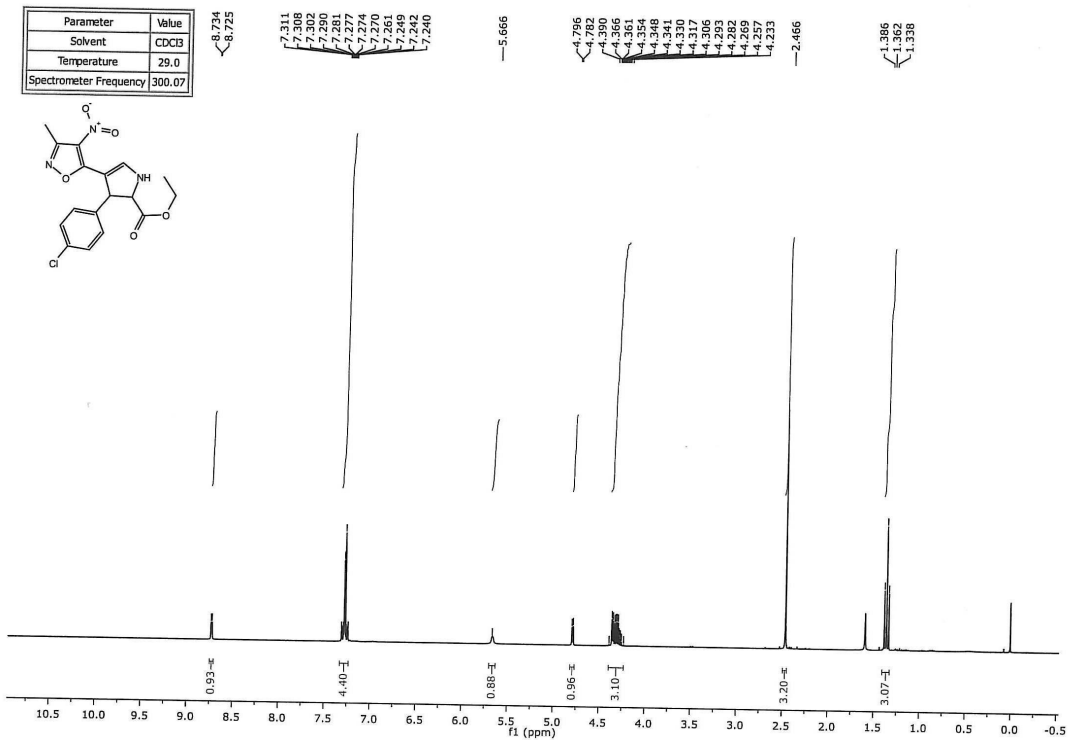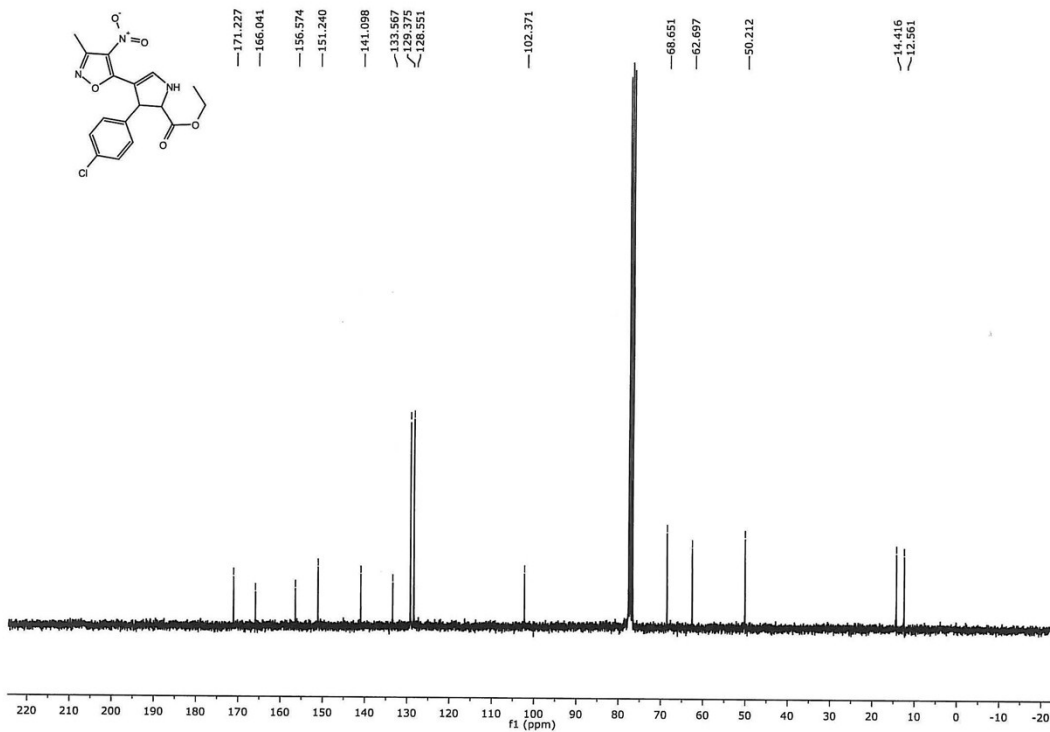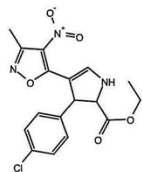

# DEFAULT REPORT

| Peak # | Component Name | Time [min] | Area [uV*sec] | Height [uV] | Area [%] | Norm. Area [%] | Cal. Range | Volt Range | BL  | Raw Amount | Adjusted Amount |
|--------|----------------|------------|---------------|-------------|----------|----------------|------------|------------|-----|------------|-----------------|
| 1      |                | 20.049     | 3719948.02    | 101367.32   | 49.79    | 49.79          |            |            | *MM | 3.7199     | 3.7199          |
| 2      |                | 27.779     | 3750705.39    | 75261.17    | 50.21    | 50.21          |            |            | *MM | 3.7507     | 3.7507          |
|        |                |            | 7470653.41    | 178628.49   | 100.00   | 100.00         |            |            |     | 7.4707     | 7.4707          |

## Missing Component Report

Component Expected Retention (Calibration File)

All components were found

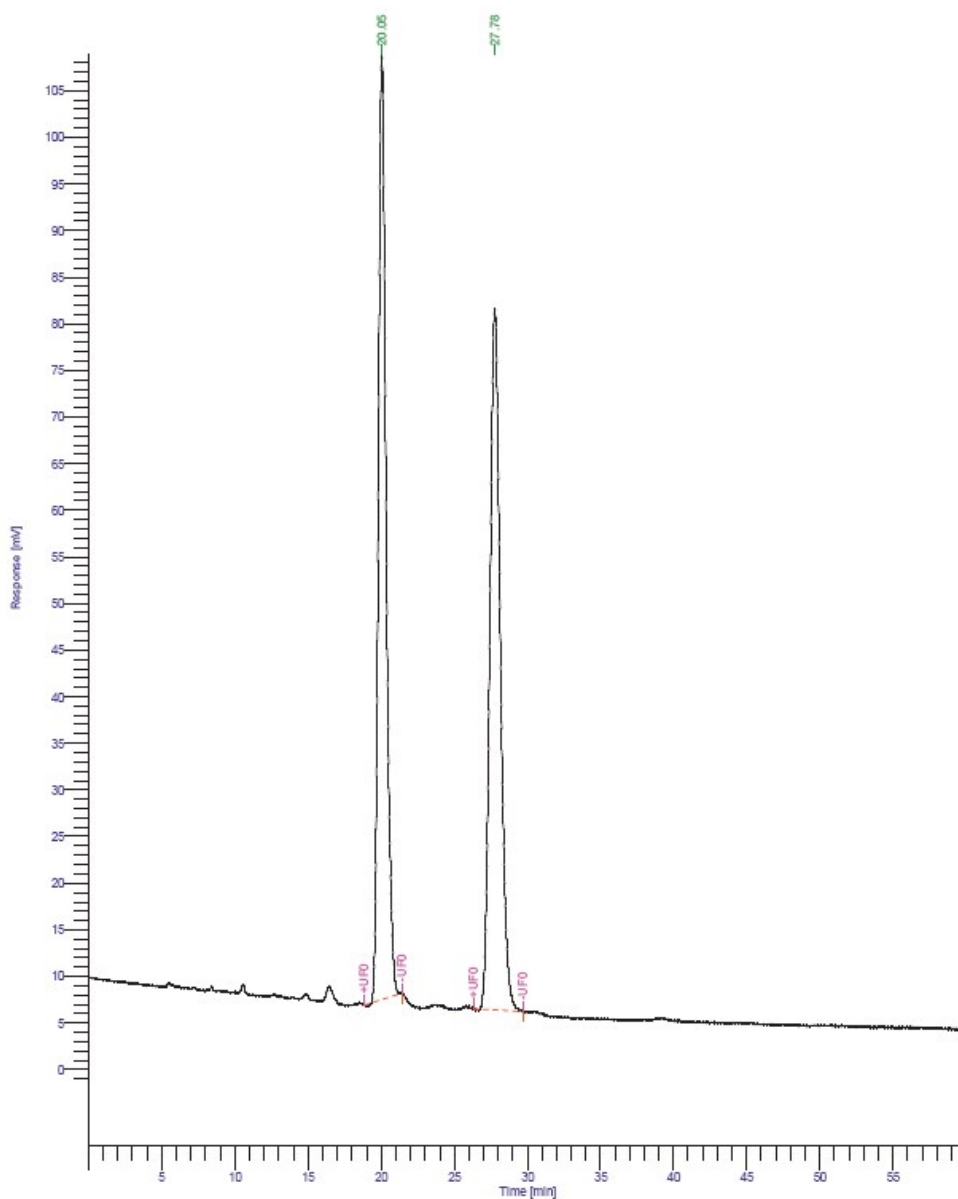

Compound 4c

# DEFAULT REPORT

| Peak # | Component Name | Time [min] | Area [uV*sec] | Height [uV] | Area [%] | Norm. Area [%] | Cal. Range | Volt Range | BL  | Raw Amount | Adjusted Amount |
|--------|----------------|------------|---------------|-------------|----------|----------------|------------|------------|-----|------------|-----------------|
| 1      |                | 19.800     | 15270042.41   | 410522.41   | 97.94    | 97.94          |            |            | *MM | 15.2700    | 15.2700         |
| 2      |                | 27.441     | 321314.13     | 7453.39     | 2.06     | 2.06           |            |            | *MM | 0.3213     | 0.3213          |
|        |                |            | 15591356.55   | 417975.80   | 100.00   | 100.00         |            |            |     | 15.5914    | 15.5914         |

Missing Component Report  
Component Expected Retention (Calibration File)

All components were found

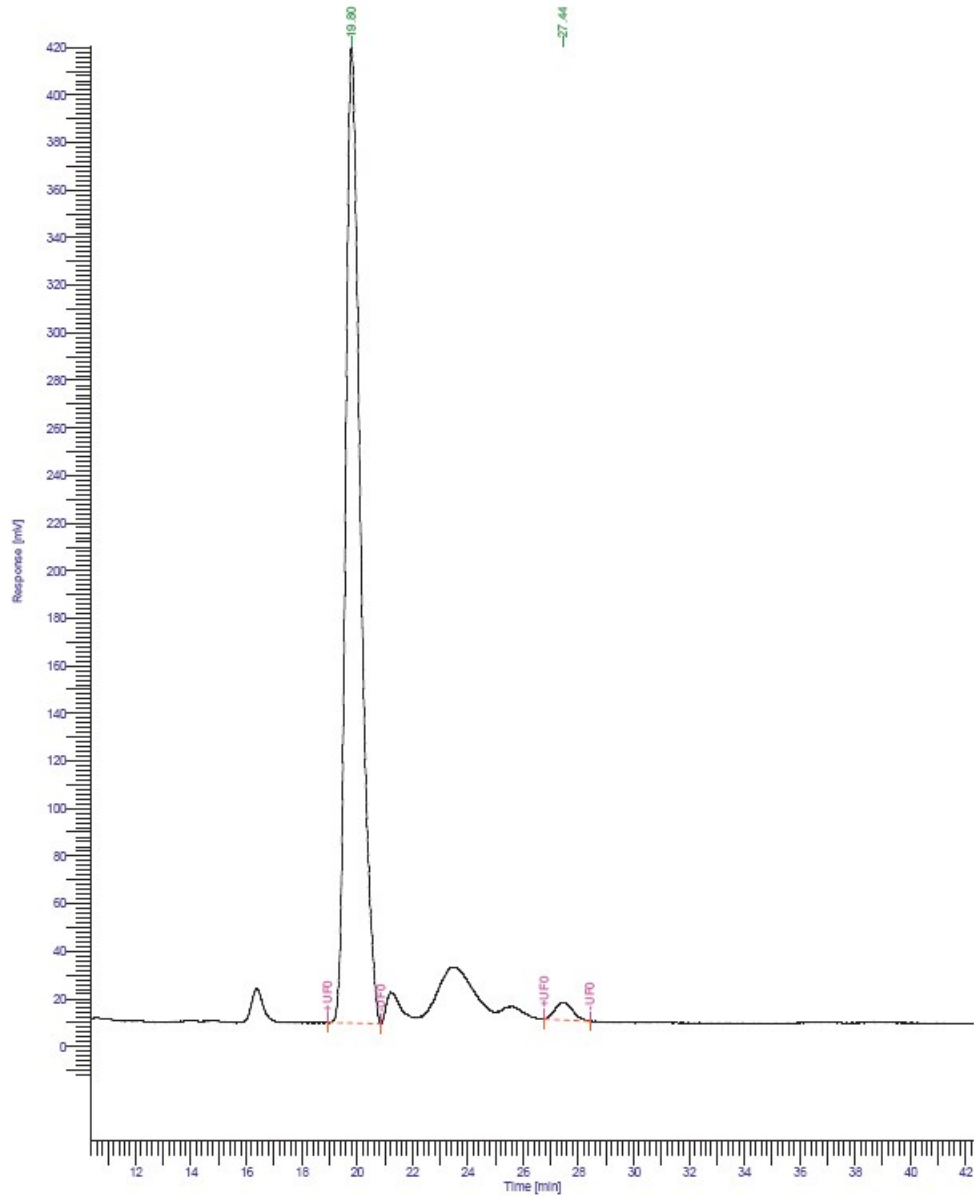

# Compound 3d

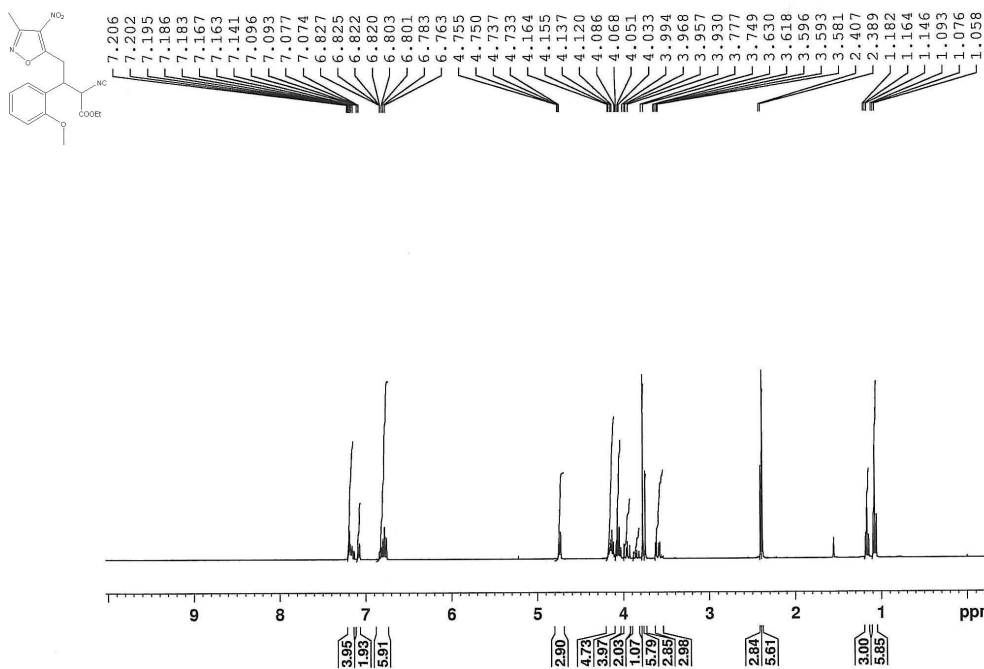

Current Data Parameters  
 NAME: 8062-2010  
 DATE: 10  
 PROCNO: 1  
 F2 - Acquisition Parameters  
 DATE\_: 20100921  
 TIME: 14.05  
 INSTRUM: spect  
 PROBPID: 5 mm PABBO QNP  
 NUC1: 13C  
 NUC2: 1H  
 SOLVENT: CDCl3  
 NS: 16  
 DS: 8221.445 Hz  
 SFO: 0.128463 Hz  
 AQ: 3.384637 sec  
 RG: 10  
 SM: 60.800 uM  
 SW: 4.00 uM  
 FID: 285.1 K  
 SFO: 1.0000000 sec  
 TDO: \*\*\*\*\* CHANNEL f1 \*\*\*\*\*  
 NUC1: 13C  
 P1: 13.10 uM  
 PL1: -1.00 dB  
 SFO1: 400.130110 MHz  
 F2 - Processing parameters  
 SI: 3274  
 SF: 400.130110 MHz  
 NDM: 0  
 SFR: 0  
 LB: 0.30 Hz  
 GB: 0  
 PC: 1.00

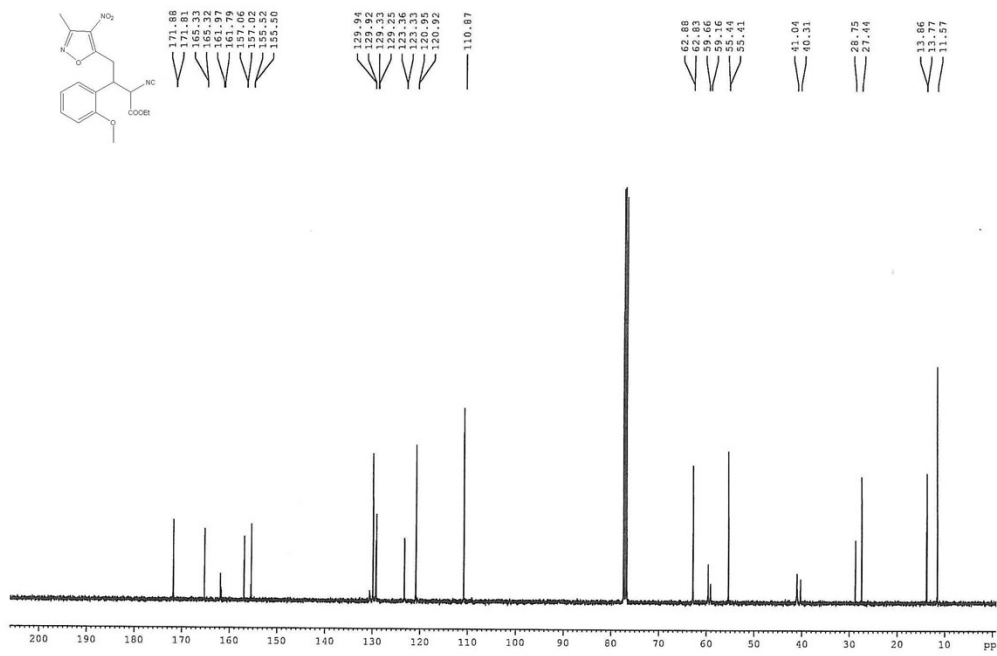

# Compound 4d

|                        |                   |
|------------------------|-------------------|
| Parameter              | Value             |
| Solvent                | CDCl <sub>3</sub> |
| Temperature            | 29.0              |
| Spectrometer Frequency | 300.07            |

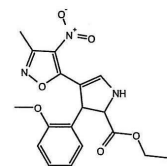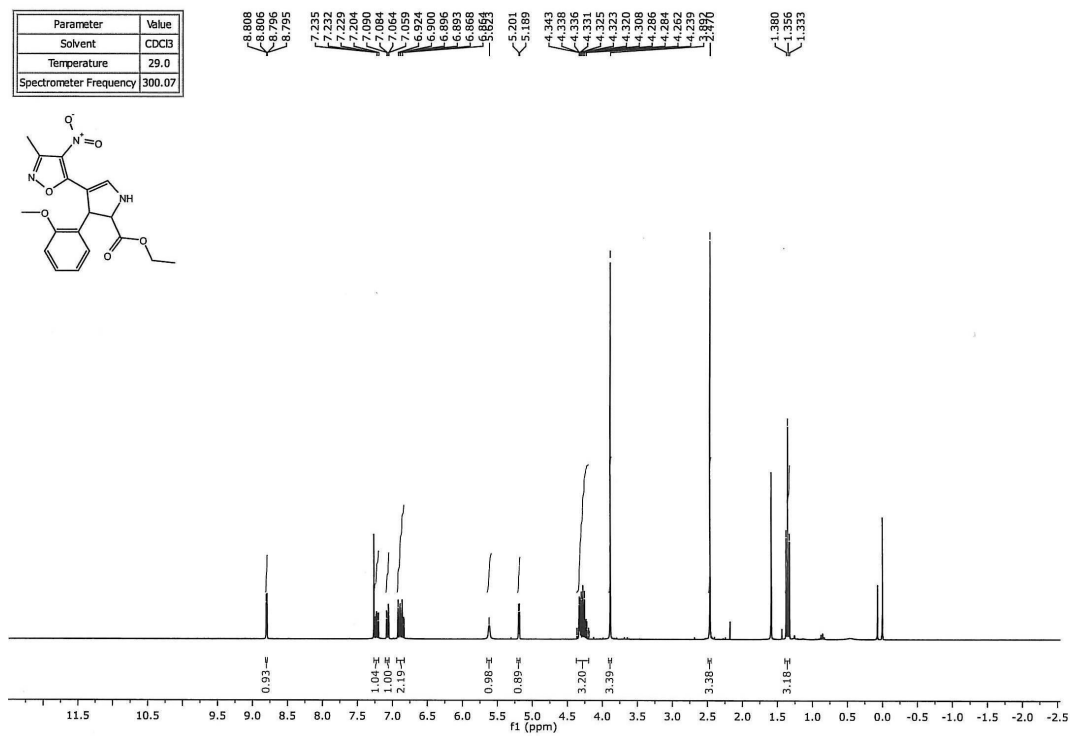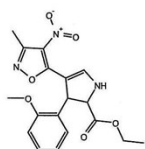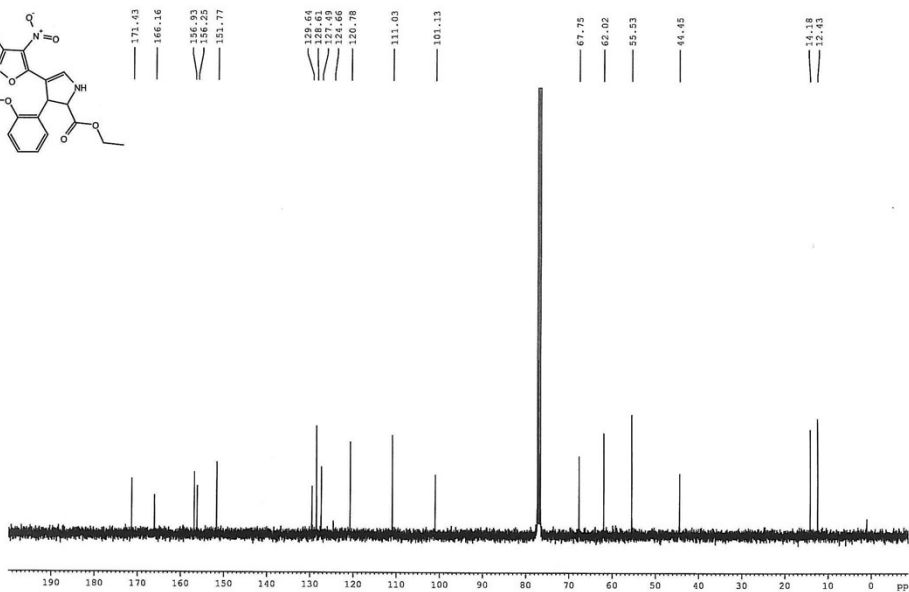

# DEFAULT REPORT

| Peak # | Component Name | Time [min] | Area [uV*sec] | Height [uV] | Area [%] | Norm. Area [%] | Cal. Range | Volt Range | BL  | Raw Amount | Adjusted Amount |
|--------|----------------|------------|---------------|-------------|----------|----------------|------------|------------|-----|------------|-----------------|
| 1      |                | 23.865     | 1950059.90    | 46182.65    | 52.45    | 52.45          |            |            | *MM | 1.9501     | 1.9501          |
| 2      |                | 31.372     | 1767607.12    | 31337.73    | 47.55    | 47.55          |            |            | *MM | 1.7676     | 1.7676          |
|        |                |            | 3717687.02    | 77520.38    | 100.00   | 100.00         |            |            |     | 3.7177     | 3.7177          |

Missing Component Report  
Component Expected Retention (Calibration File)

All components were found

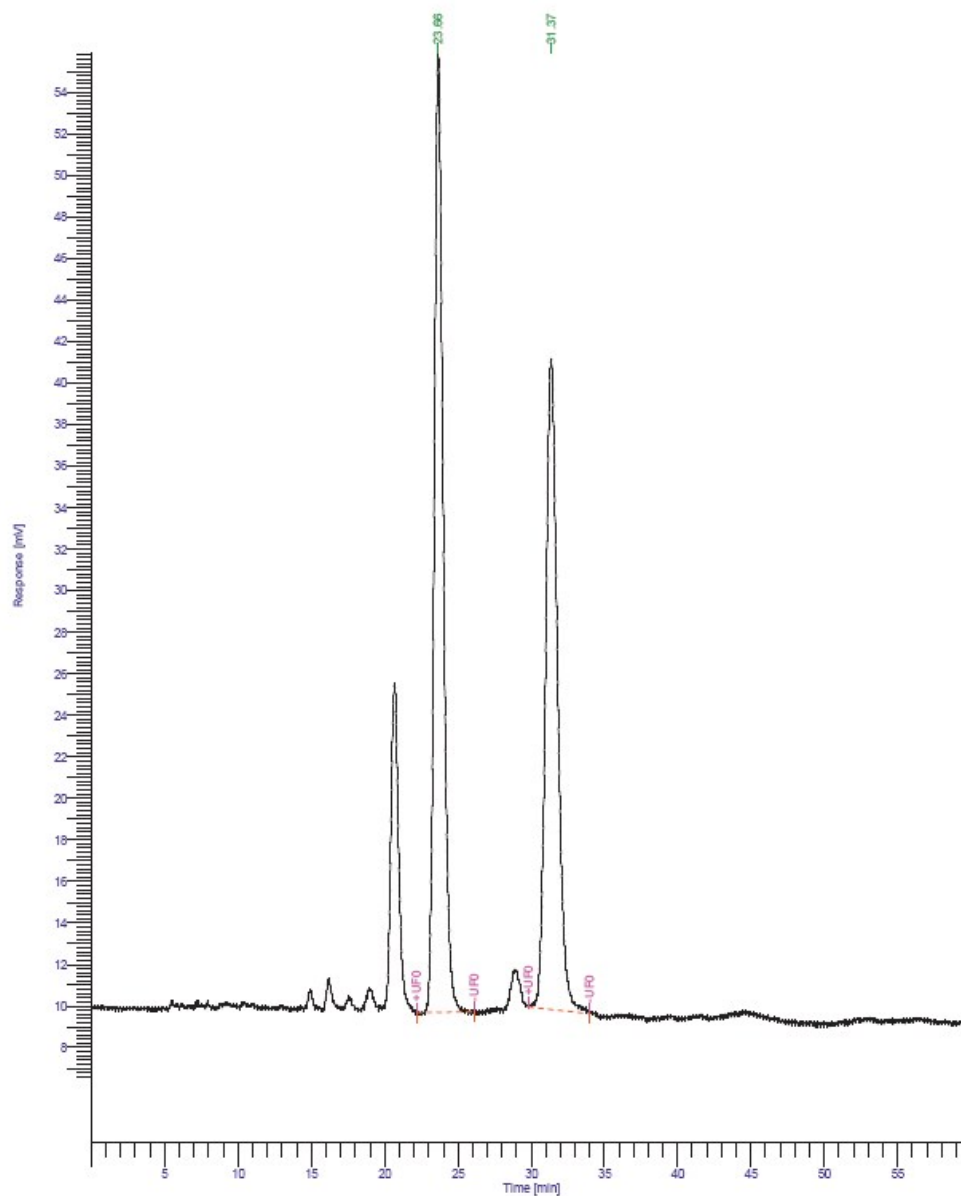



# Compound 4d

## DEFAULT REPORT

| Peak # | Component Name | Time [min] | Area [uV*sec] | Height [uV] | Area [%] | Norm. Area [%] | Cal. Range | Volt Range | BL  | Raw Amount | Adjusted Amount |
|--------|----------------|------------|---------------|-------------|----------|----------------|------------|------------|-----|------------|-----------------|
| 1      |                | 25.351     | 3254637.03    | 75587.79    | 98.35    | 98.35          |            |            | *MM | 3.2546     | 3.2546          |
| 2      |                | 33.770     | 54658.29      | 1153.18     | 1.65     | 1.65           |            |            | *MM | 0.0547     | 0.0547          |
|        |                |            | 3309295.33    | 76740.98    | 100.00   | 100.00         |            |            |     | 3.3093     | 3.3093          |

Missing Component Report  
Component Expected Retention (Calibration File)

All components were found

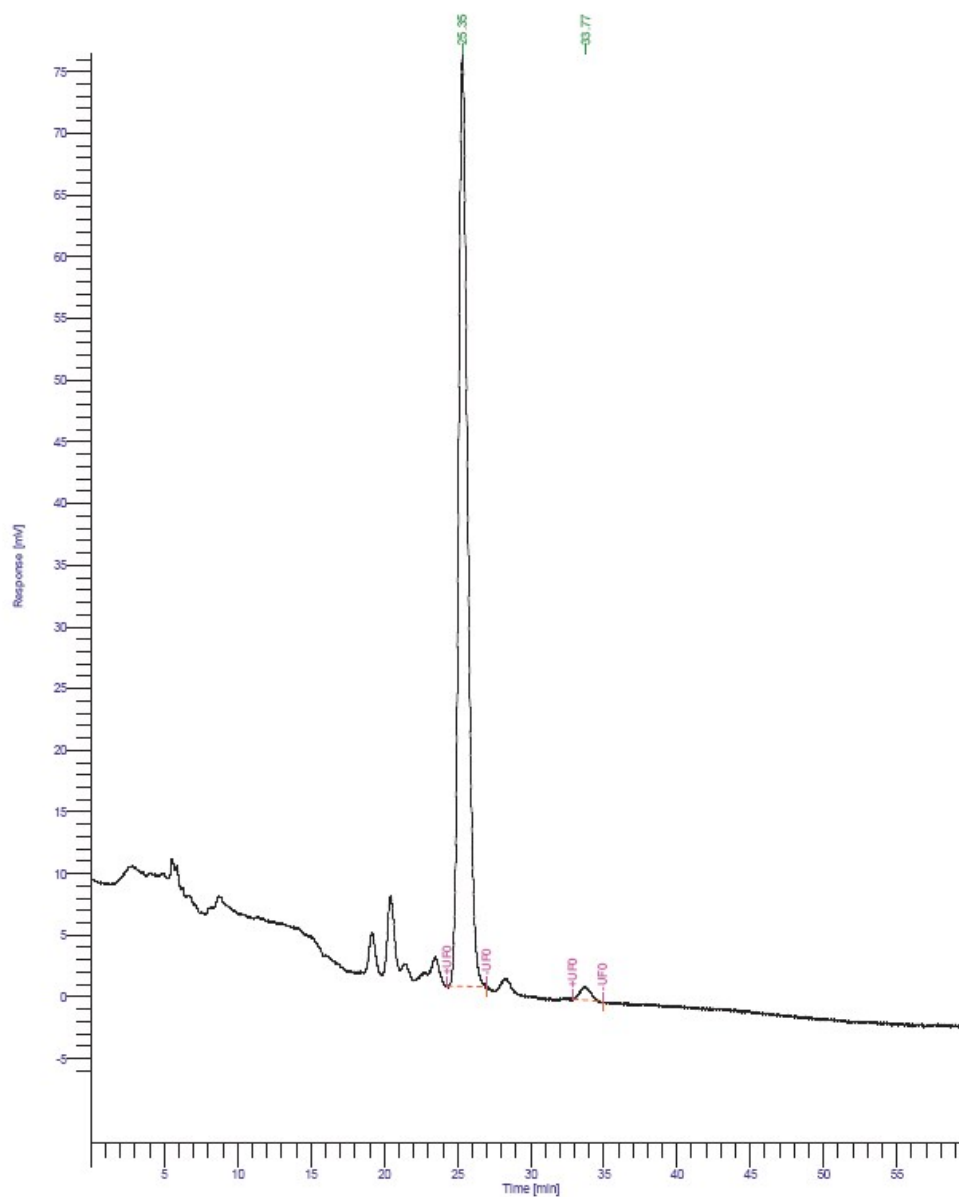

Compound *ent-4d*

# DEFAULT REPORT

| Peak # | Component Name | Time [min] | Area [uV*sec] | Height [uV] | Area [%] | Norm. Area [%] | Cal. Range | Volt Range | BL | Raw Amount | Adjusted Amount |        |
|--------|----------------|------------|---------------|-------------|----------|----------------|------------|------------|----|------------|-----------------|--------|
| 1      |                | 23.489     | 31747.92      | 907.57      | 3.79     | 3.79           |            |            |    | *MM        | 0.0317          | 0.0317 |
| 2      |                | 30.690     | 806789.51     | 15012.95    | 96.21    | 96.21          |            |            |    | *MM        | 0.8068          | 0.8068 |
|        |                |            | 838537.43     | 15920.51    | 100.00   | 100.00         |            |            |    |            | 0.8385          | 0.8385 |

Missing Component Report  
Component Expected Retention (Calibration File)

All components were found

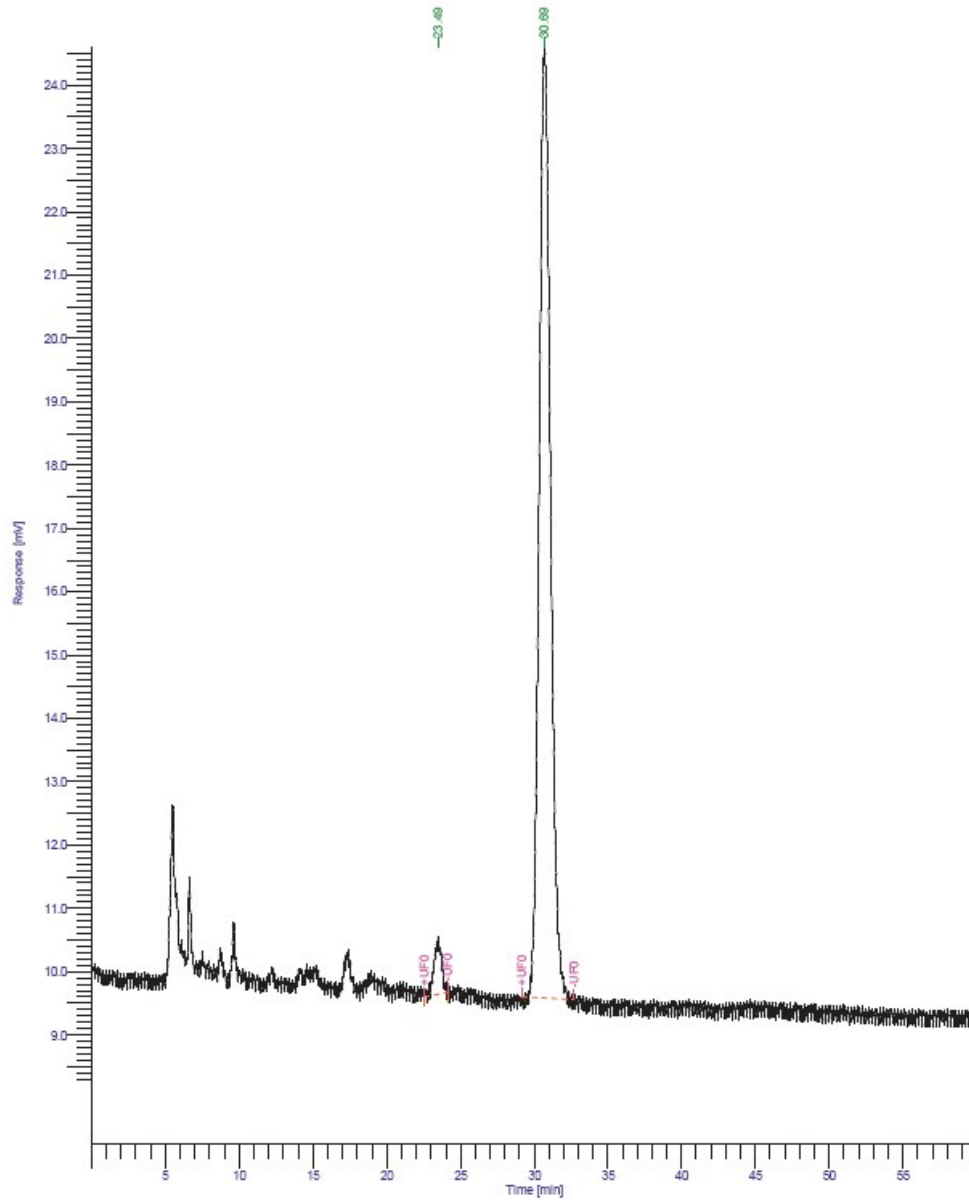

# Compound 3e

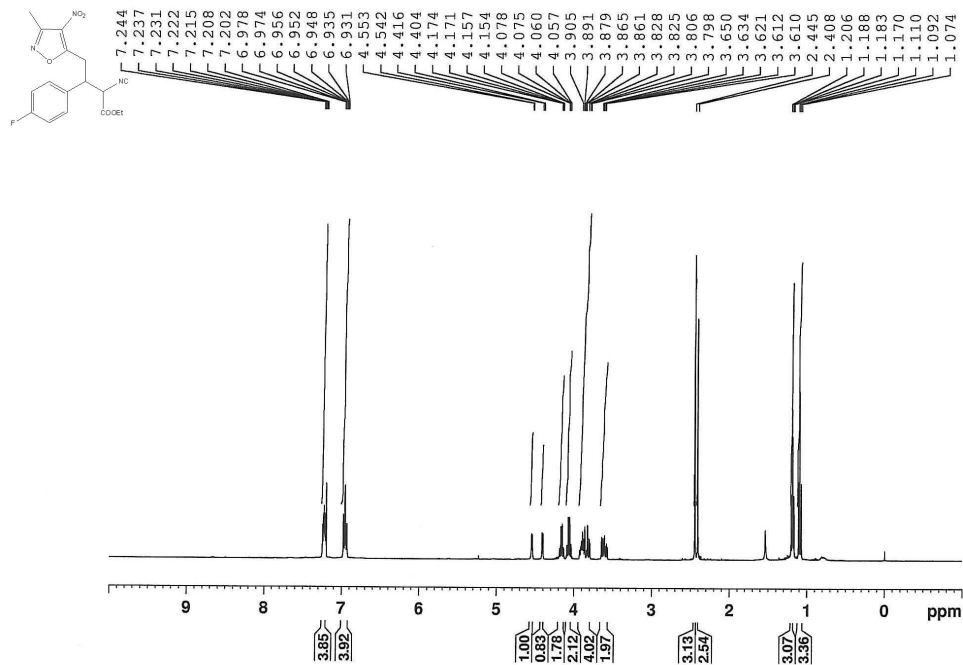

Current Data Parameters  
 NAME Aug3-2019  
 EXPNO 4  
 F2 - Acquisition Parameters  
 Date\_ 20180823  
 Time 20:28  
 INSTRUM spect  
 PULPROG zgpg30  
 PROCNO 5  
 TD 65536  
 SOLVENT CDCl3  
 NS 128  
 DS 8  
 SWH 4023.685 Hz  
 FIDRES 0.129483 Hz  
 AQ 3.9846287 sec  
 RG 228  
 DM 60.800 usec  
 DE 6.00 usec  
 TE 300.2 K  
 D1 2.0000000 sec  
 TBO 1

----- CHANNEL f1 -----  
 NUC1 13  
 P1 13.12 usec  
 PL1 -1.00 dB  
 SFO1 100.626109 MHz

F2 - Processing parameters  
 SI 32768  
 SF 100.626109 MHz  
 MSW 0  
 EN 0  
 LB 0.30 Hz  
 GB 0  
 PC 1.00

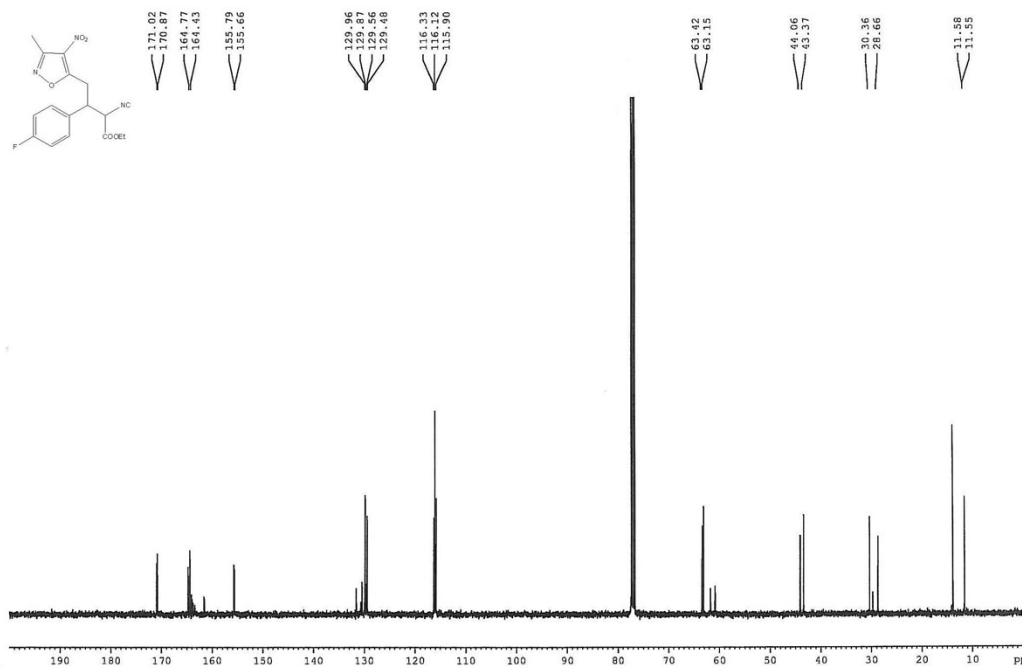

Compound 4e

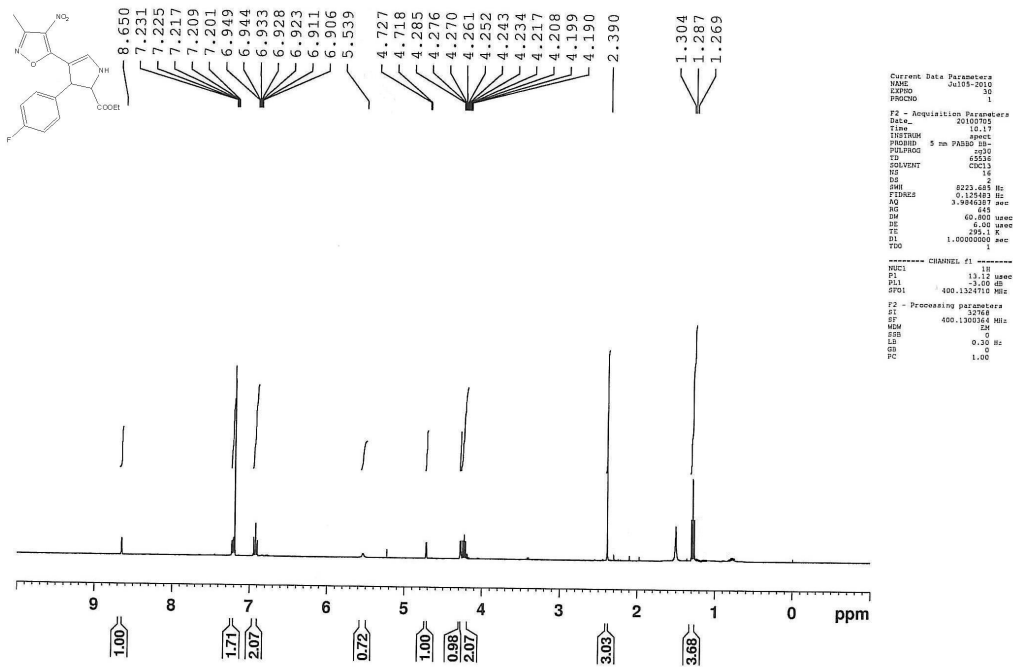

```

Current Data Parameters
NAME      Jul15-2010
EXPNO    30
PROCNO   1

F2 - Acquisition Parameters
Date_    20100715
Time     15.17
INSTRUM  spect
PROBHD   5 mm PABBO
PULPROG  zgpg
TE       300K
SOLVENT  CDCl3
NS       16
DS       2
SWH      8223.487 Hz
FIDRES   0.125489 Hz
AQ       3.5862827 sec
RG       645
SFO      400.1324710 MHz
NUC1      13C
NUC2      13C
PC       1.00

----- CHANNEL f1 -----
NUC1      13C
P1        13.12 usec
PL1       -1.00 dB
SFO1      400.1324710 MHz

F2 - Processing parameters
SI        32768
SF        400.1303184 MHz
MSW      2M
SSB      EM
LB        0.30 Hz
GB
PC       1.00
    
```

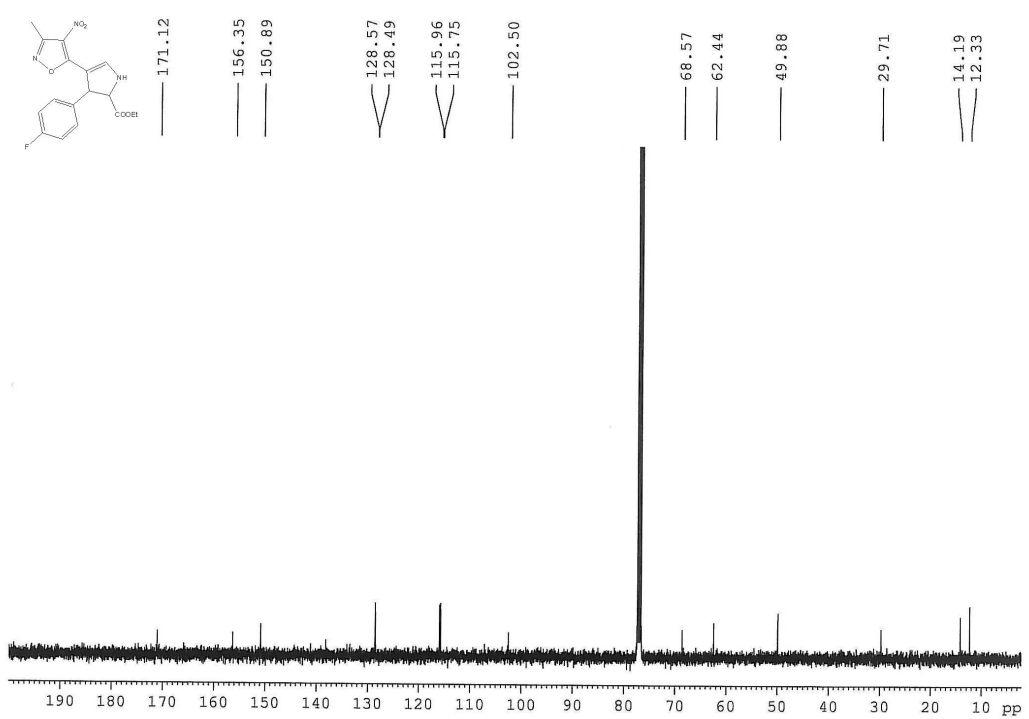

# DEFAULT REPORT

| Peak # | Component Name | Time [min] | Area [uV*sec] | Height [uV] | Area [%] | Norm. Area [%] | Cal. Range | Volt Range | BL  | Raw Amount | Adjusted Amount |
|--------|----------------|------------|---------------|-------------|----------|----------------|------------|------------|-----|------------|-----------------|
| 1      |                | 18.649     | 859178.47     | 25737.59    | 50.85    | 50.85          |            |            | *MM | 0.8592     | 0.8592          |
| 2      |                | 29.568     | 830290.64     | 16330.19    | 49.15    | 49.15          |            |            | *MM | 0.8303     | 0.8303          |
|        |                |            | 1689469.10    | 42067.78    | 100.00   | 100.00         |            |            |     | 1.6895     | 1.6895          |

Missing Component Report  
Component Expected Retention (Calibration File)

All components were found

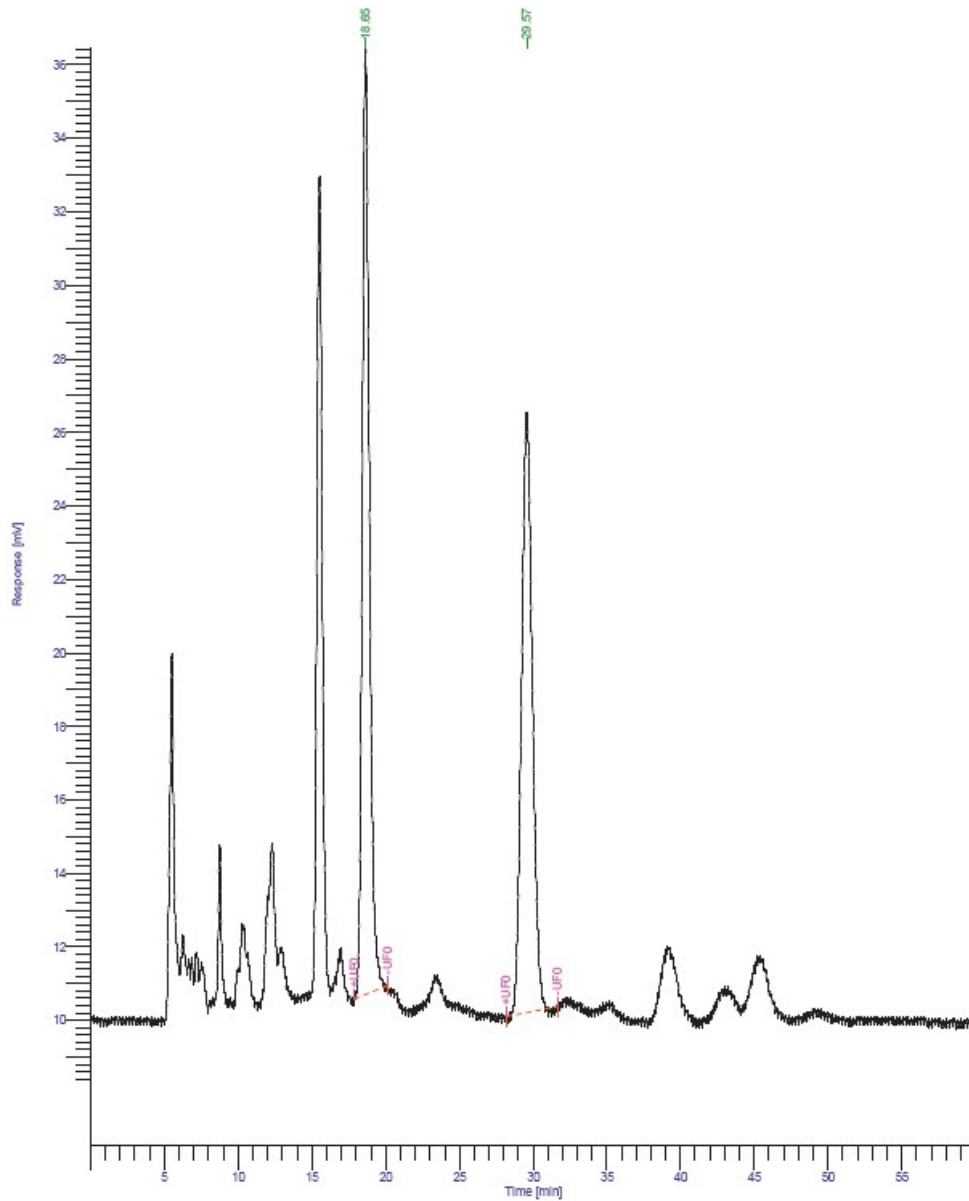

# DEFAULT REPORT

| Peak # | Component Name | Time [min] | Area [ $\mu\text{V}^2\text{sec}$ ] | Height [ $\mu\text{V}$ ] | Area [%] | Norm. Area [%] | Cal. Range | Volt Range | BL  | Raw Amount | Adjusted Amount |
|--------|----------------|------------|------------------------------------|--------------------------|----------|----------------|------------|------------|-----|------------|-----------------|
| 1      |                | 18.524     | 938629.53                          | 29258.88                 | 93.93    | 93.93          |            |            | *MM | 0.9386     | 0.9386          |
| 2      |                | 29.003     | 60691.81                           | 1293.06                  | 6.07     | 6.07           |            |            | *MM | 0.0607     | 0.0607          |
|        |                |            | 999321.34                          | 30541.95                 | 100.00   | 100.00         |            |            |     | 0.9993     | 0.9993          |

Missing Component Report  
Component Expected Retention (Calibration File)

All components were found

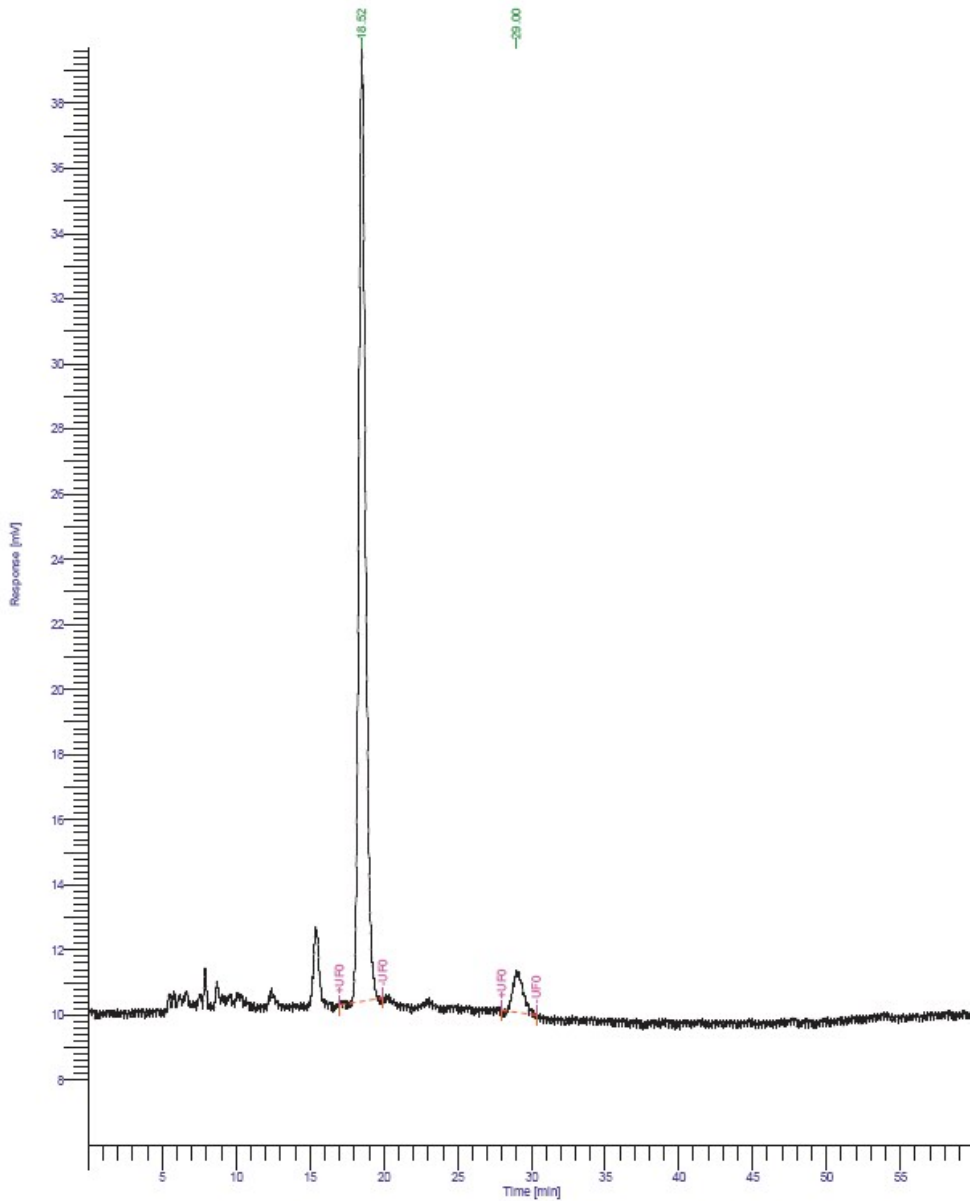

# Compound 3f

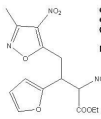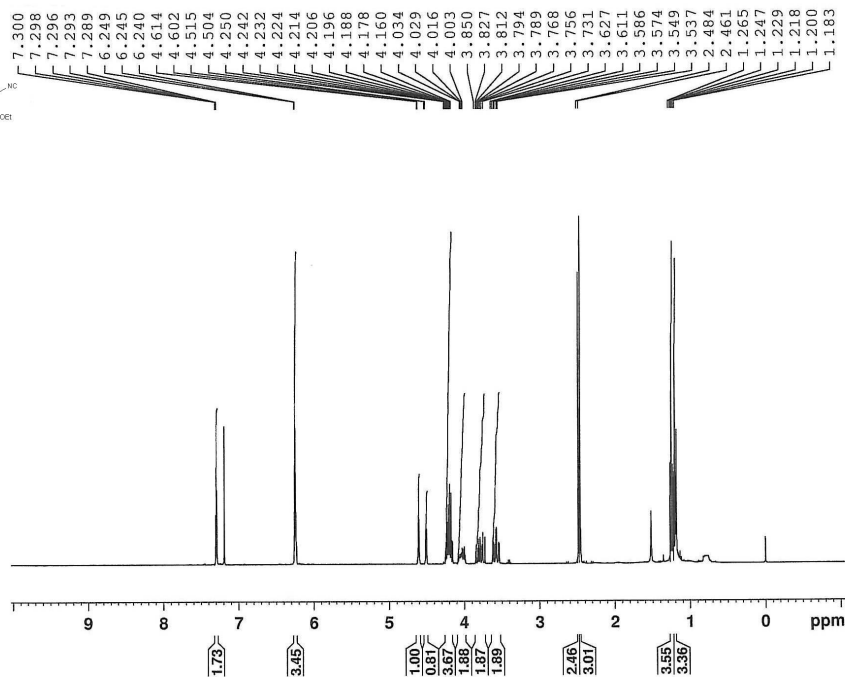

```

Current Data Parameters
NAME: F40-286-11a
EXPNO: 10
PROCNO: 10
F2 - Acquisition Parameters
Date_: 20100908
Time: 17.23
INSTRUM: spect
PROBHD: 5 mm PABBO HS
PULPROG: zg30
TD: 65536
SOLVENT: CDCl3
NS: 16
DS: 4
SWH: 8233.465 Hz
FIDRES: 0.125481 Hz
AQ: 3.3846387 sec
RG: 287
IN: 60.808 usec
PC: 6.00 usec
DT: 234.76 nsec
DQ: 1.00000000 sec
TD0: 1
----- CHANNEL f1 -----
NUC1: 13
P1: 13.12 usec
PL1: -1.00 dB
SFO1: 400.1324711 MHz
F2 - Processing Parameters
SI: 32768
SF: 400.1320314 MHz
WDW: EM
SSB: 0
LB: 0.30 Hz
GB: 0
PC: 1.00
    
```

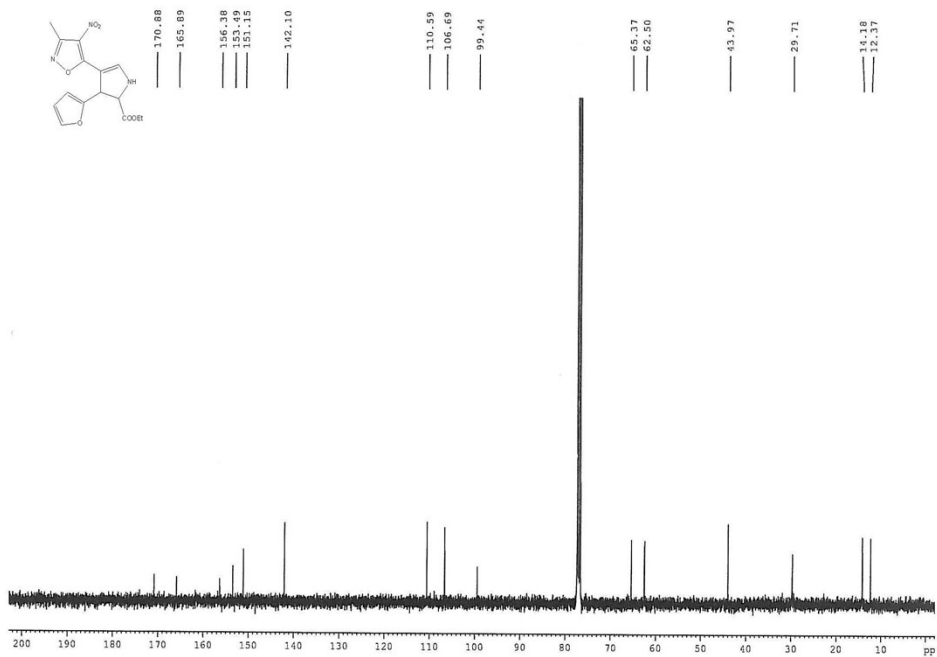

# Compound 4f

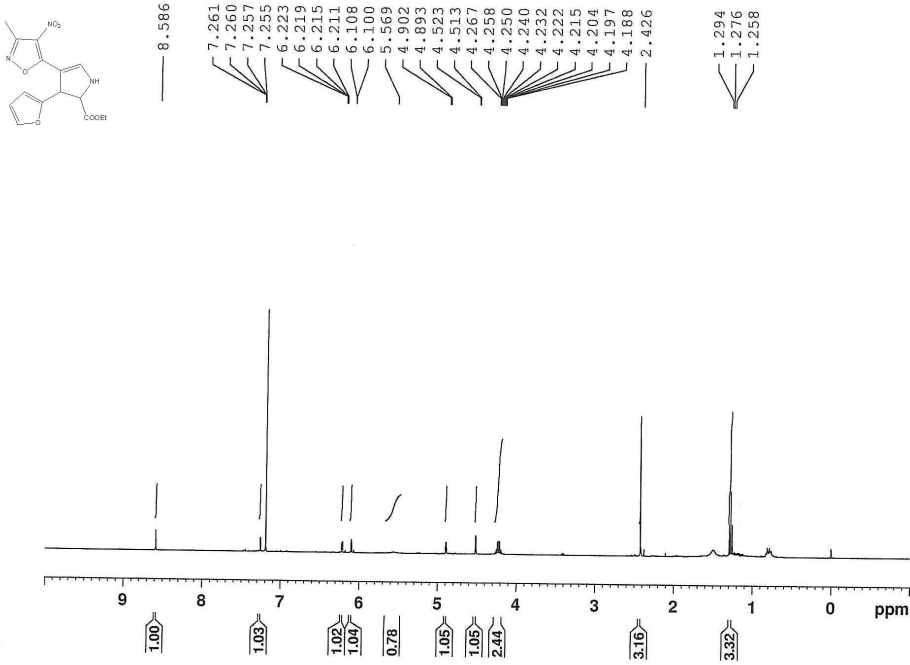

```

Current Data Parameters
NAME      F40-2504a
EXPNO    20
PROCNO   1

F2 - Acquisition Parameters
Date_    20100910
Time     21.58
INSTRUM  spect
PROBHD   5 mm PABBO QNP
PULPROG  zg30
TD        65536
SOLVENT  CDCl3
DS        128
SWH       8233.685 Hz
FIDRES   0.122480 Hz
AQ        1.3846281 sec
RG        641
SFO1     400.1324110 MHz
WDW       EM
SSB       0
GB        0
PC        2.0000000 sec

----- CHANNEL f1 -----
NUC1      13
P1        13.12 usec
PL1       -0.00 dB
SFO1     400.1324110 MHz

F2 - Processing parameters
SI        32768
SF        400.1300365 MHz
WDW       EM
SSB       0
GB        0
PC        2.00
  
```

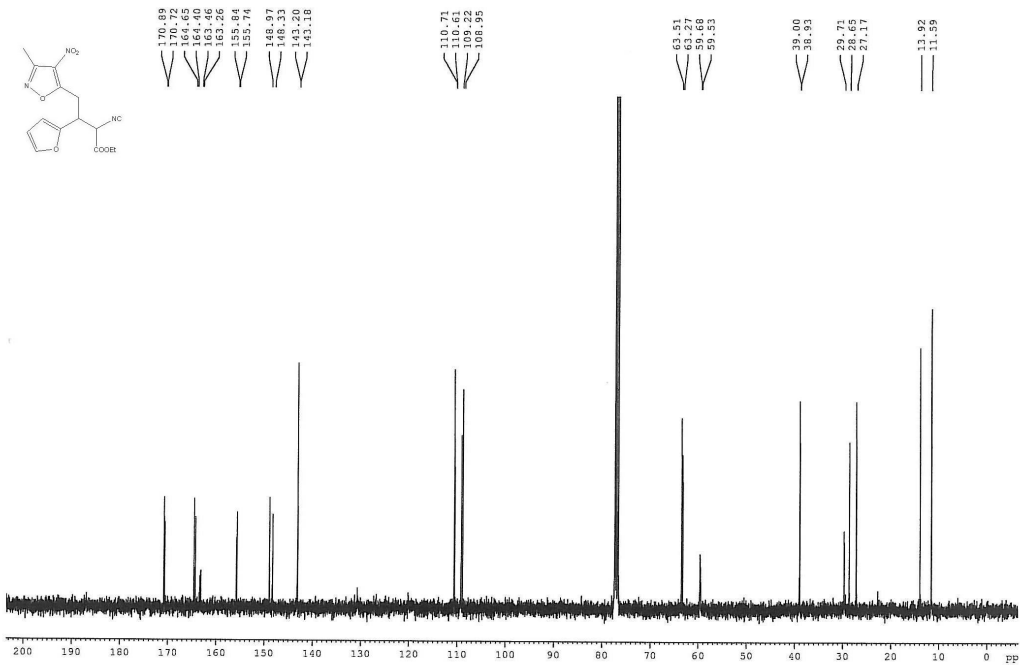



# DEFAULT REPORT

| Peak # | Component Name | Time [min] | Area [uV*sec] | Height [uV] | Area [%] | Norm. Area [%] | Cal. Range | Volt Range | BL  | Raw Amount | Adjusted Amount |
|--------|----------------|------------|---------------|-------------|----------|----------------|------------|------------|-----|------------|-----------------|
| 1      |                | 21.362     | 1203330.75    | 32873.89    | 50.25    | 50.25          |            |            | *MM | 1.2033     | 1.2033          |
| 2      |                | 23.577     | 1191576.34    | 29951.41    | 49.75    | 49.75          |            |            | *MM | 1.1916     | 1.1916          |
|        |                |            | 2394907.09    | 62825.31    | 100.00   | 100.00         |            |            |     | 2.3949     | 2.3949          |

## Missing Component Report

Component Expected Retention (Calibration File)

All components were found

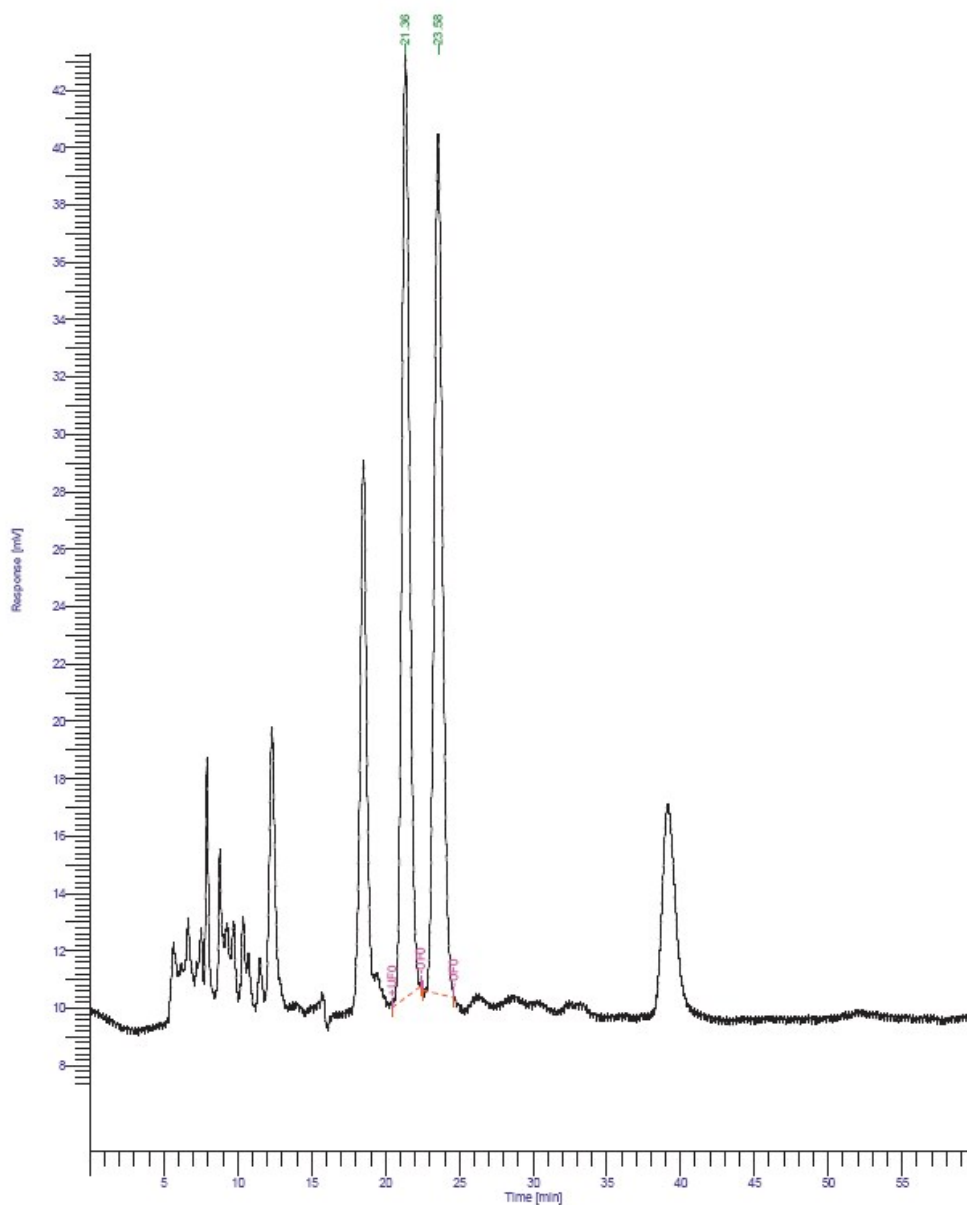

Compound 4f

# DEFAULT REPORT

| Peak # | Component Name | Time [min] | Area [uV*sec] | Height [uV] | Area [%] | Norm. Area [%] | Cal. Range | Volt Range | BL  | Raw Amount | Adjusted Amount |
|--------|----------------|------------|---------------|-------------|----------|----------------|------------|------------|-----|------------|-----------------|
| 1      |                | 21.267     | 4687933.09    | 122703.77   | 94.61    | 94.61          |            |            | *MM | 4.5879     | 4.5879          |
| 2      |                | 23.498     | 261452.20     | 7111.11     | 5.39     | 5.39           |            |            | *MM | 0.2615     | 0.2615          |
|        |                |            | 4849385.29    | 129814.88   | 100.00   | 100.00         |            |            |     | 4.8494     | 4.8494          |

## Missing Component Report

Component Expected Retention (Calibration File)

All components were found

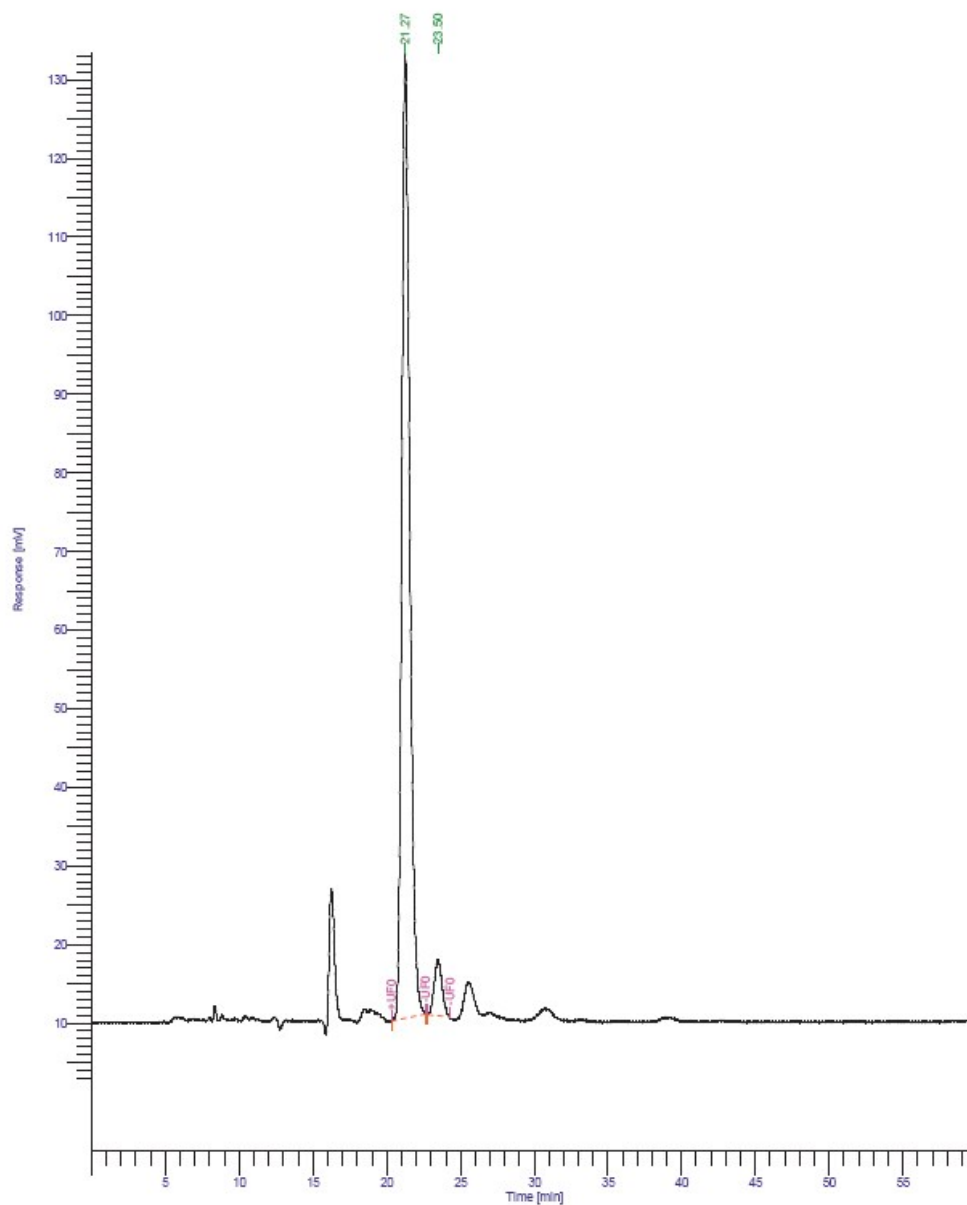

Compound 3g

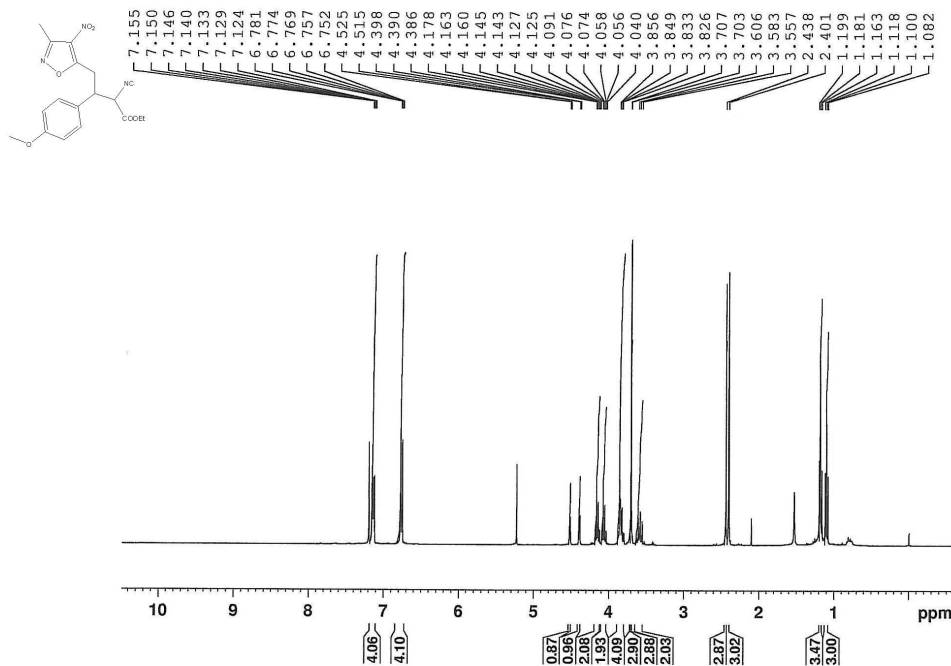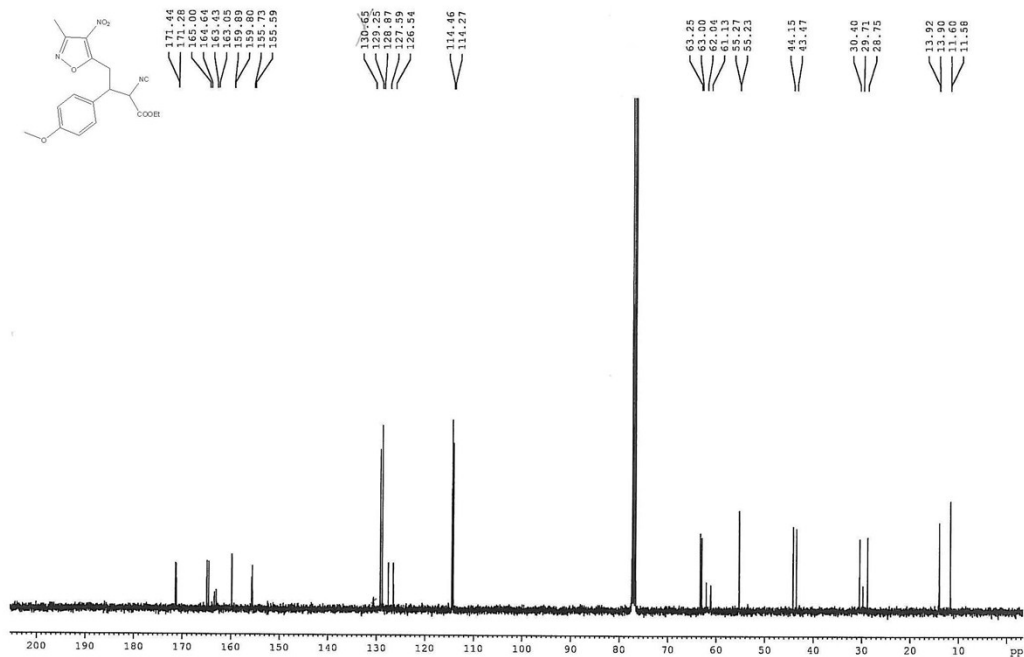

Compound 4g

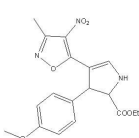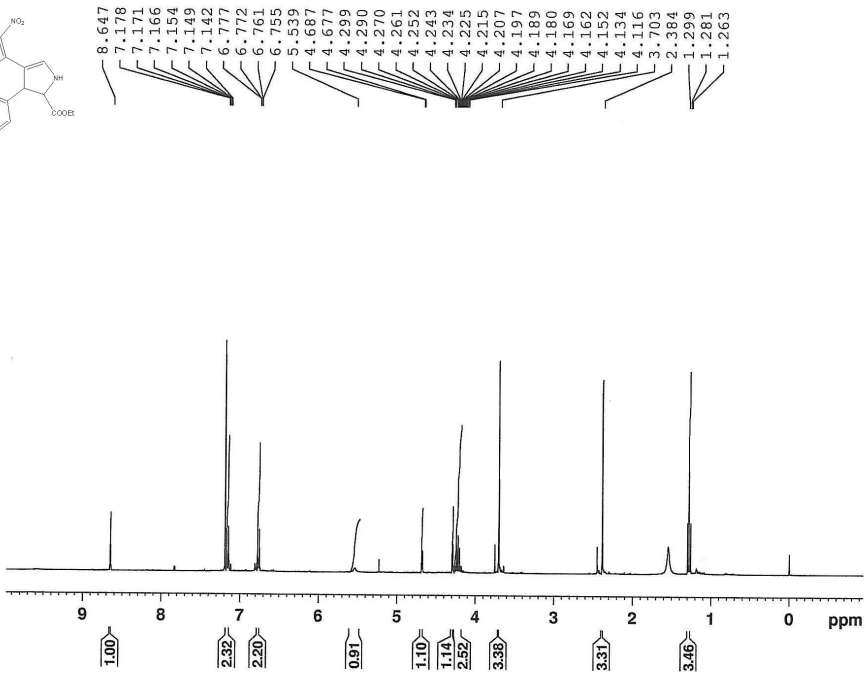

```

Current Data Parameters
NAME      Aug22-2010
EXPNO    10
PROCNO   1

F2 - Acquisition Parameter
Date_    20100822
Time     12.40
INSTRUM  spect
PROBHD   5 mm PABBO BH-
PULPROG  zg30
TE       300.2
SOLVENT  CDCl3
NS       128
DS       0
SWH      8223.685 Hz
FIDRES   0.125483 Hz
AQ       3.9846397 se
RG       512
DM       60.800 um
DE       6.00 um
TE       294.3 K
SI       2.00000000 se
TD0      1

===== CHANNEL f1 =====
NUC1      1H
P1       13.12 us
PL1      -3.00 dB
SFO1     400.1324710 MHz

F2 - Processing parameters
SI       32768
SF       400.1300002 MHz
WDW      EM
SSB      0
LB       0.30 Hz
GB       0
PC       1.00
  
```

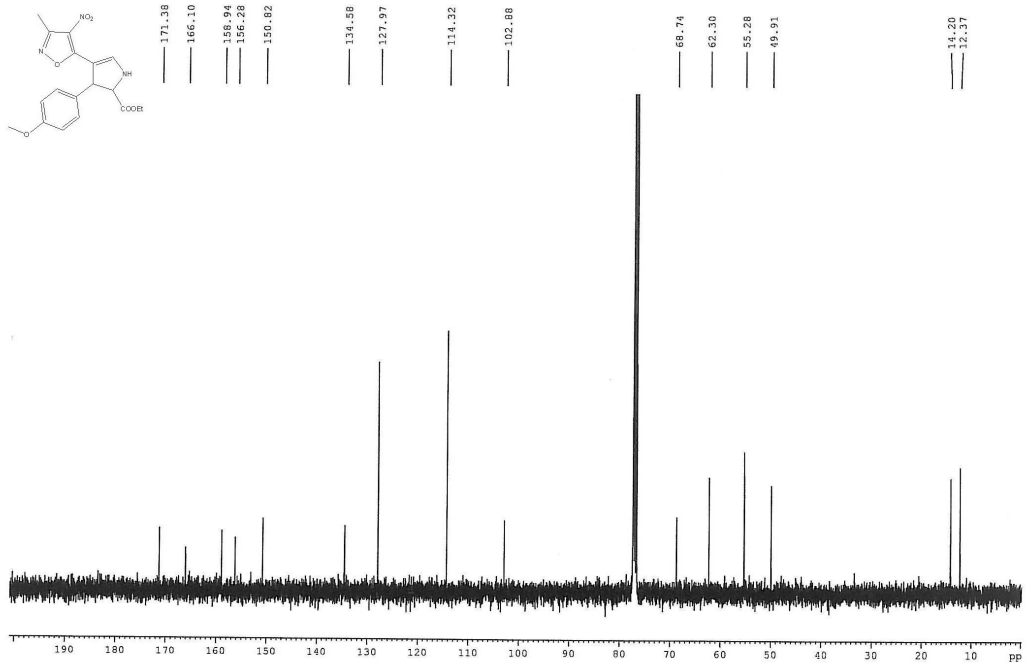

### SAMPLE INFORMATION

|                            |                                  |                                    |
|----------------------------|----------------------------------|------------------------------------|
| Sample Name: PAO-216-high  | Acquired By: System              | Date Acquired: 6/21/10 12:35:40 PM |
| Sample Type: Unknown       | Acq. Method Set: Chiralmiscela   | Date Processed: 6/21/10 1:47:49 PM |
| Vial: 1                    | Processing Method: HPLC          | Channel Name: PDA Single 421.0 nm  |
| Injection #: 1             | Proc. Chnl. Descr.: PDA 254.0 nm |                                    |
| Injection Volume: 10.00 ul |                                  |                                    |
| Run Time: 45.0 Minutes     |                                  |                                    |
| Sample Set Name:           |                                  |                                    |

Auto-Scaled Chromatogram

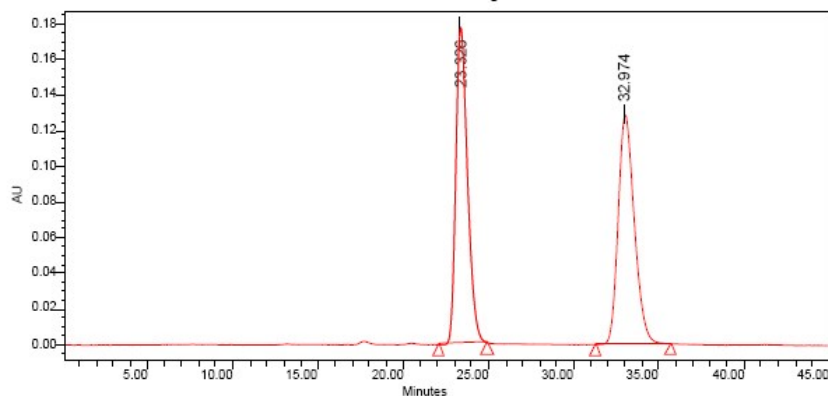

Unknown Peak Results

| Peak Type | RT     | Area    | % Area | Height |
|-----------|--------|---------|--------|--------|
| 1 Unknown | 23.326 | 8432062 | 49.80  | 177506 |
| 2 Unknown | 32.974 | 8480219 | 50.20  | 128609 |

### Compound 4g

### SAMPLE INFORMATION

|                            |                                  |                                    |
|----------------------------|----------------------------------|------------------------------------|
| Sample Name: PAO-239-2     | Acquired By: System              | Date Acquired: 6/21/10 11:48:37 AM |
| Sample Type: Unknown       | Acq. Method Set: Chiralmiscela   | Date Processed: 6/21/10 1:52:35 PM |
| Vial: 3                    | Processing Method: HPLC          | Channel Name: PDA Single 421.0 nm  |
| Injection #: 1             | Proc. Chnl. Descr.: PDA 254.0 nm |                                    |
| Injection Volume: 10.00 ul |                                  |                                    |
| Run Time: 45.0 Minutes     |                                  |                                    |
| Sample Set Name: PPDD      |                                  |                                    |

Auto-Scaled Chromatogram

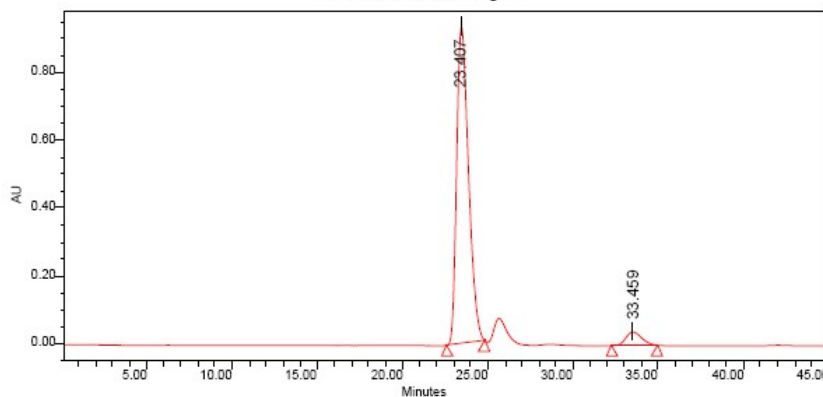

Unknown Peak Results

| Peak Type | RT     | Area     | % Area | Height |
|-----------|--------|----------|--------|--------|
| 1 Unknown | 23.407 | 45178895 | 94.57  | 931115 |
| 2 Unknown | 33.459 | 2592919  | 5.43   | 39981  |

### Compound 3h

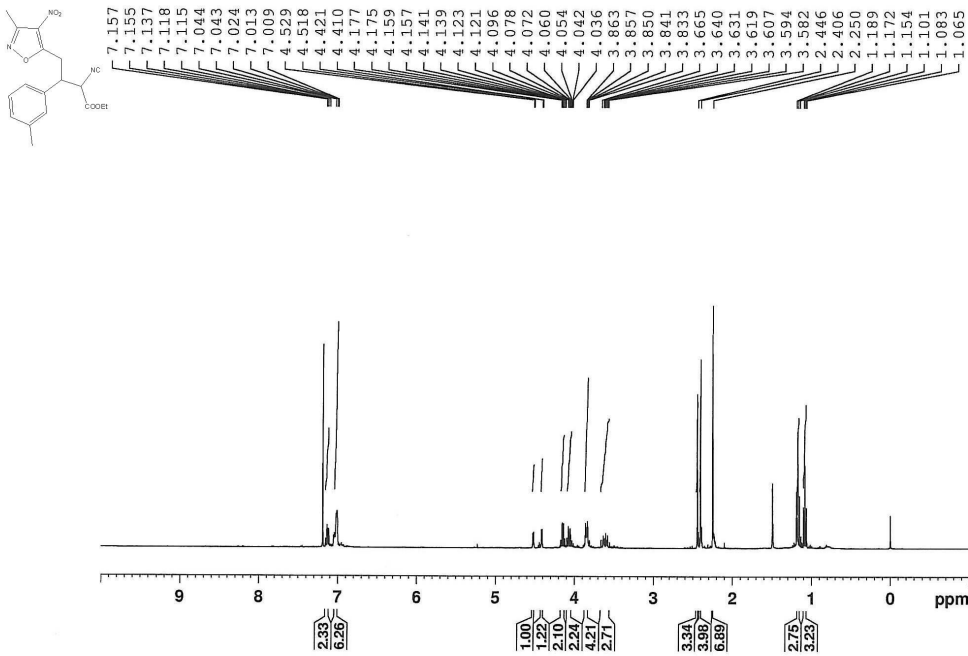

Current Data Parameters  
 NAME P00-218  
 EXPNO 1  
 PROCNO 1  
 F2 - Acquisition Parameters  
 Date\_ 20100921  
 Time 10.29  
 INSTRUM spect  
 PROBHD 5 mm PABBO BB-  
 PULPROG zgpg  
 TD 65536  
 SOLVENT DMSO-d6  
 NS 16  
 DS 2  
 SWH 8223.645 Hz  
 FIDRES 0.133463 Hz  
 AQ 3.9946187 sec  
 RG 625  
 IN 60.000000 sec  
 DE 6.000000 sec  
 TE 294.2 K  
 D1 1.00000000 sec  
 TDS 1  
 ===== CHANNEL f1 =====  
 NUC1 13  
 P1 13.12 usec  
 PL1 -3.00 dB  
 SFO1 400.130470 MHz  
 F2 - Processing parameters  
 SI 32768  
 SF 400.130355 MHz  
 SWH 8223.645  
 FSN 0  
 LB 0.30 Hz  
 GB 0  
 CB 1.00

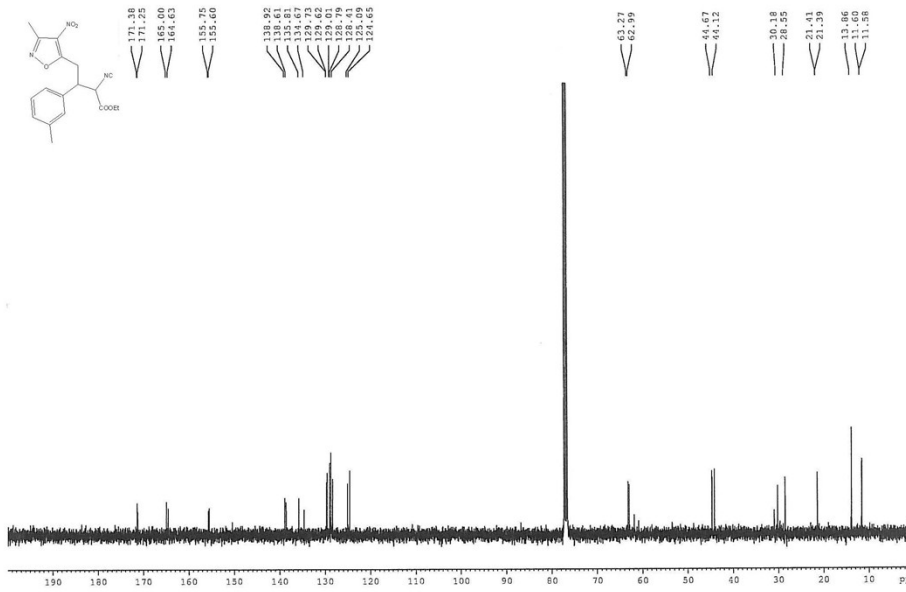

Compound 4h

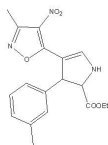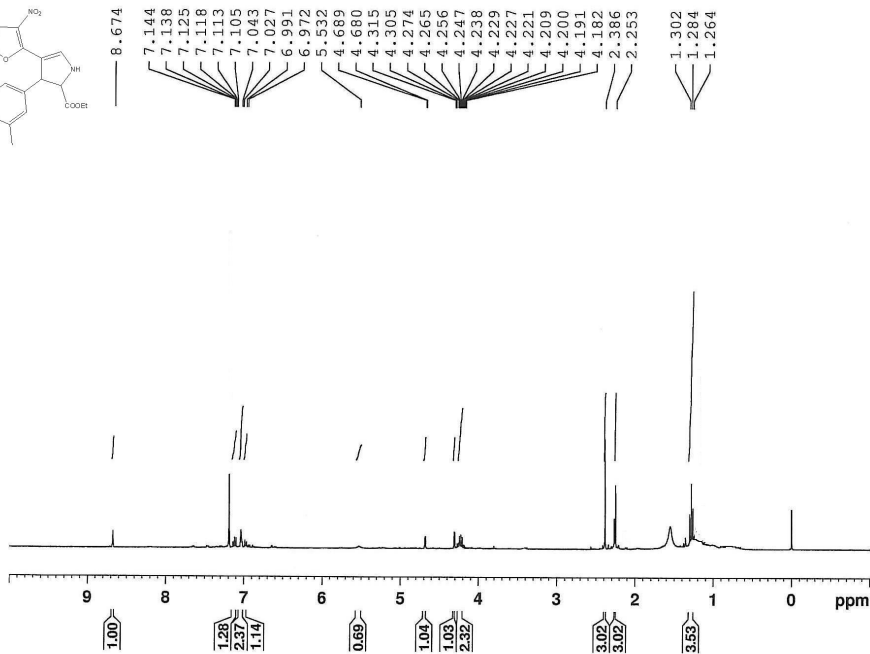

```

Current Data Parameters
NAME: 800-07041
EXPNO: 10
PROCNO: 1

F2 - Acquisition Parameters
Date_: 20100908
Time: 17:32
INSTRUM: spect
PROBHD: 5 mm PABBO BH-
PULPROG: zgpg30
TD: 65536
SOLVENT: CDCl3
NS: 14
DS: 2
SWH: 8023.685 Hz
FIDRES: 0.12583 Hz
AQ: 5.984637 sec
RG: 456
DSB: 40.800 usec
DE: 6.00 usec
TE: 294.9 K
D1: 1.00000000 sec
TD0: 1

----- CHANNEL f1 -----
NUC1: 13
P1: 12.00 usec
PL1: -3.00 dB
SFO1: 400.132410 MHz

F2 - Processing parameters
SI: 32768
SF: 400.130385 MHz
WDW: EM
SSB: 0
LB: 0.30 Hz
GB: 0
CB: 1.00

```

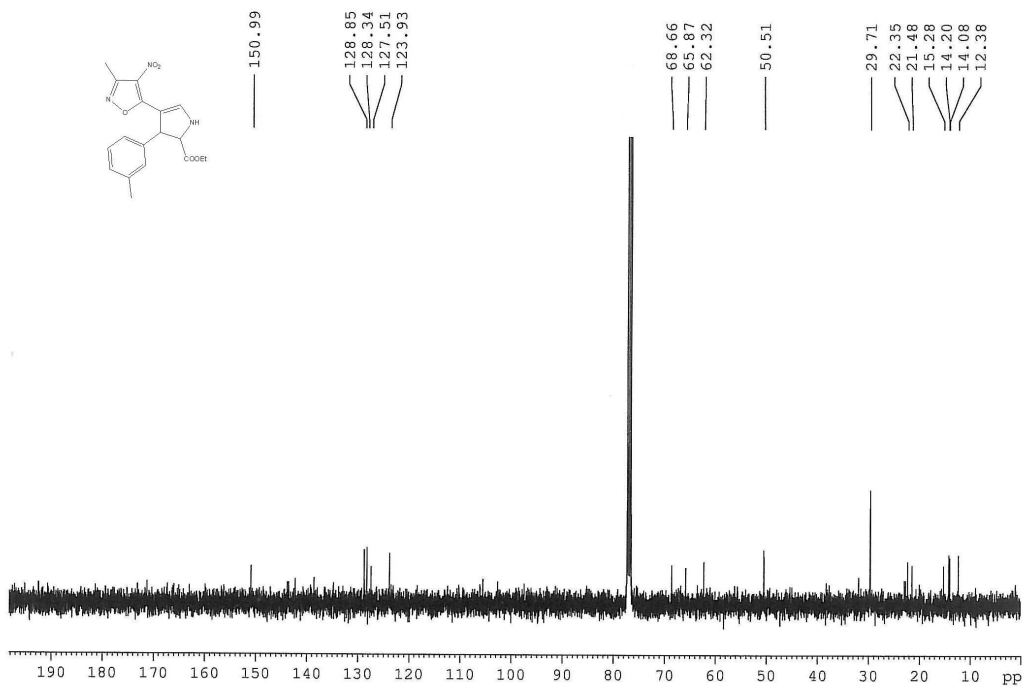

# DEFAULT REPORT

| Peak # | Component Name | Time [min] | Area [uV*sec] | Height [uV] | Area [%] | Norm. Area [%] | Cal. Range | Volt Range | BL  | Raw Amount | Adjusted Amount |
|--------|----------------|------------|---------------|-------------|----------|----------------|------------|------------|-----|------------|-----------------|
| 1      |                | 17.270     | 2752821.05    | 91034.11    | 52.80    | 52.80          |            |            | *MM | 2.7528     | 2.7528          |
| 2      |                | 29.590     | 2480912.88    | 48624.82    | 47.20    | 47.20          |            |            | *MM | 2.4809     | 2.4809          |
|        |                |            | 5213733.93    | 139658.93   | 100.00   | 100.00         |            |            |     | 5.2137     | 5.2137          |

## Missing Component Report

Component Expected Retention (Calibration File)

All components were found

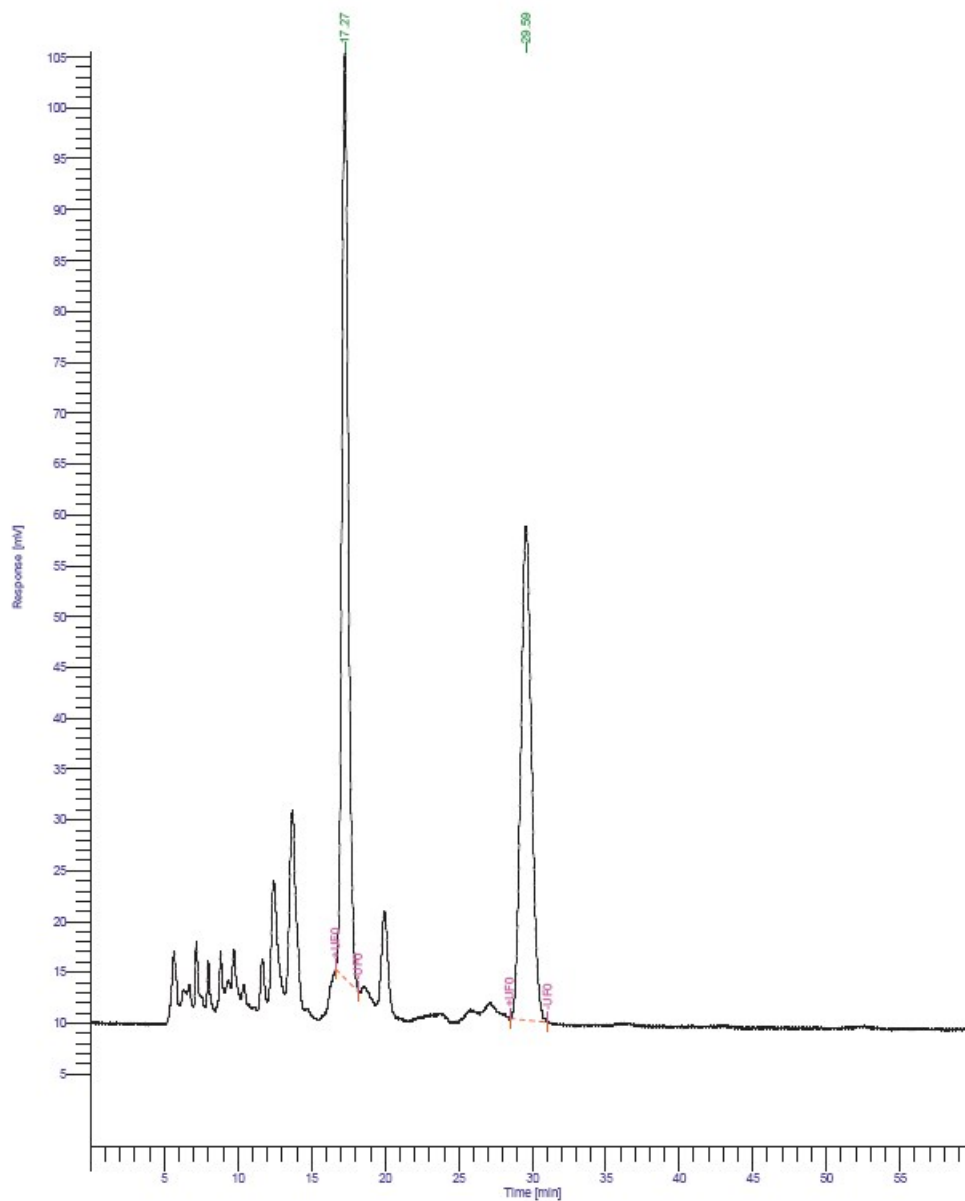

Compound 4h



# DEFAULT REPORT

| Peak # | Component Name | Time [min] | Area [uV*sec] | Height [uV] | Area [%] | Norm. Area [%] | Cal. Range | Volt Range | BL  | Raw Amount | Adjusted Amount |
|--------|----------------|------------|---------------|-------------|----------|----------------|------------|------------|-----|------------|-----------------|
| 1      |                | 17.815     | 649869.84     | 21453.19    | 96.79    | 96.79          |            |            | *MM | 0.6499     | 0.6499          |
| 2      |                | 30.947     | 21519.22      | 457.76      | 3.21     | 3.21           |            |            | *MM | 0.0215     | 0.0215          |
|        |                |            | 671389.06     | 21910.95    | 100.00   | 100.00         |            |            |     | 0.6714     | 0.6714          |

Missing Component Report  
Component Expected Retention (Calibration File)

All components were found

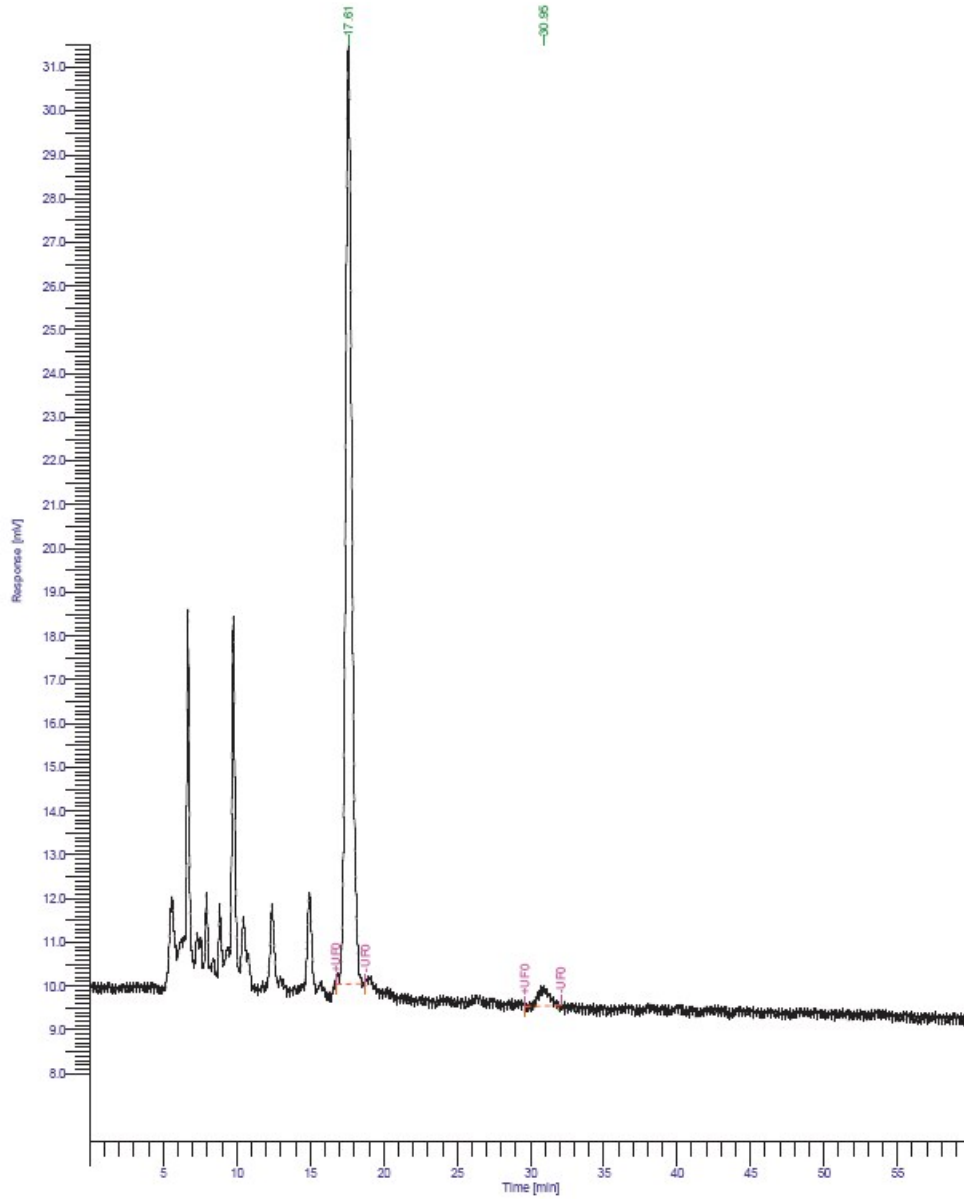

Compound 3i

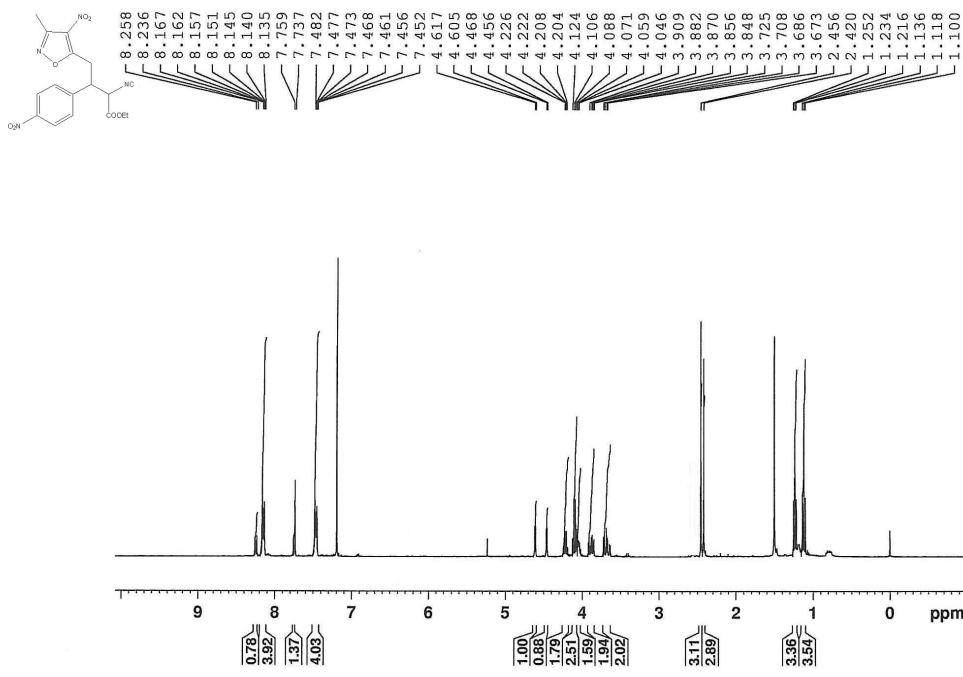

Current Data Parameters  
 NAME Aug23-2010  
 EXPNO 11  
 PROCNO 1  
 F2 - Acquisition Parameters  
 Date\_ 20100926  
 Time 4.15  
 INSTRUM spect  
 PULPROG zgpg30  
 PCPRGMR 5 mm PABBO v0  
 PULPROG zgpg30  
 TD 65536  
 SOLVENT CDCl3  
 NS 128  
 DS 4  
 SWH 8233.800 Hz  
 FIDRES 0.120483 Hz  
 AQ 3.9846187 sec  
 RG 512  
 IN 60.800 usec  
 DE 6.00 usec  
 TE 295.1 K  
 D1 2.00000000 sec  
 D2 1  
 D3 1  
 ----- CHANNEL f1 -----  
 NUC1 13  
 P1 13.12 usec  
 PL1 -3.00 dB  
 SFO1 400.124710 MHz  
 F2 - Processing parameters  
 SI 32768  
 SF 400.1305360 MHz  
 WF 10  
 SSB 0  
 LB 0.30 Hz  
 GB 0  
 PC 1.00

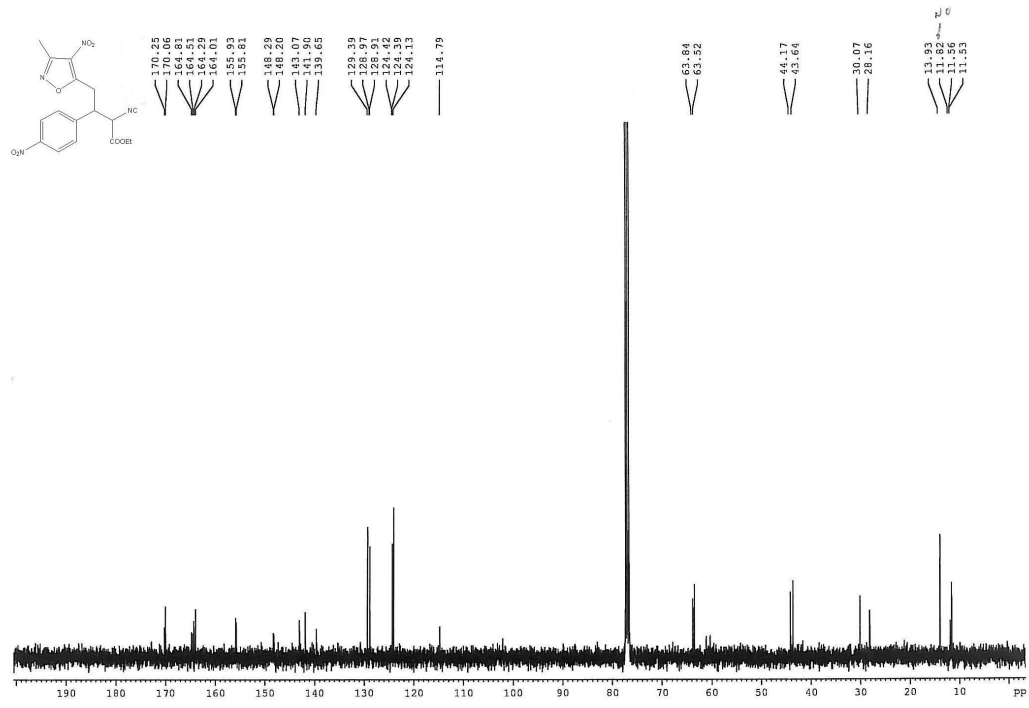

# Compound 4i

| Parameter              | Value             |
|------------------------|-------------------|
| Solvent                | CDCl <sub>3</sub> |
| Temperature            | 29.0              |
| Spectrometer Frequency | 300.07            |

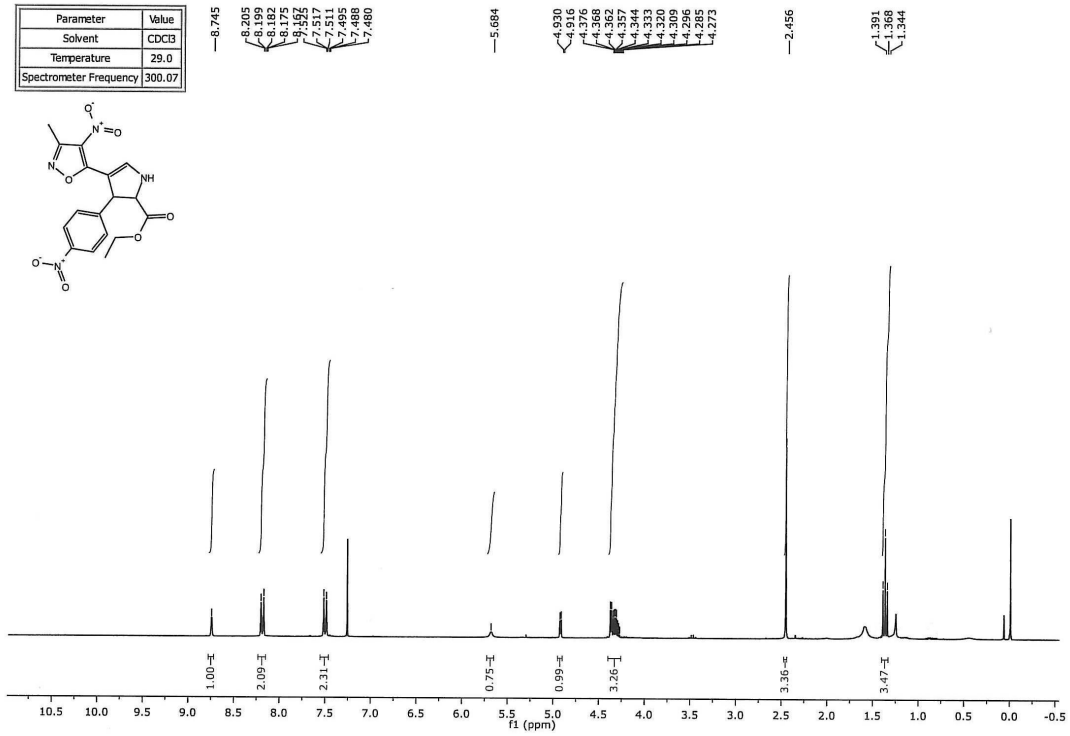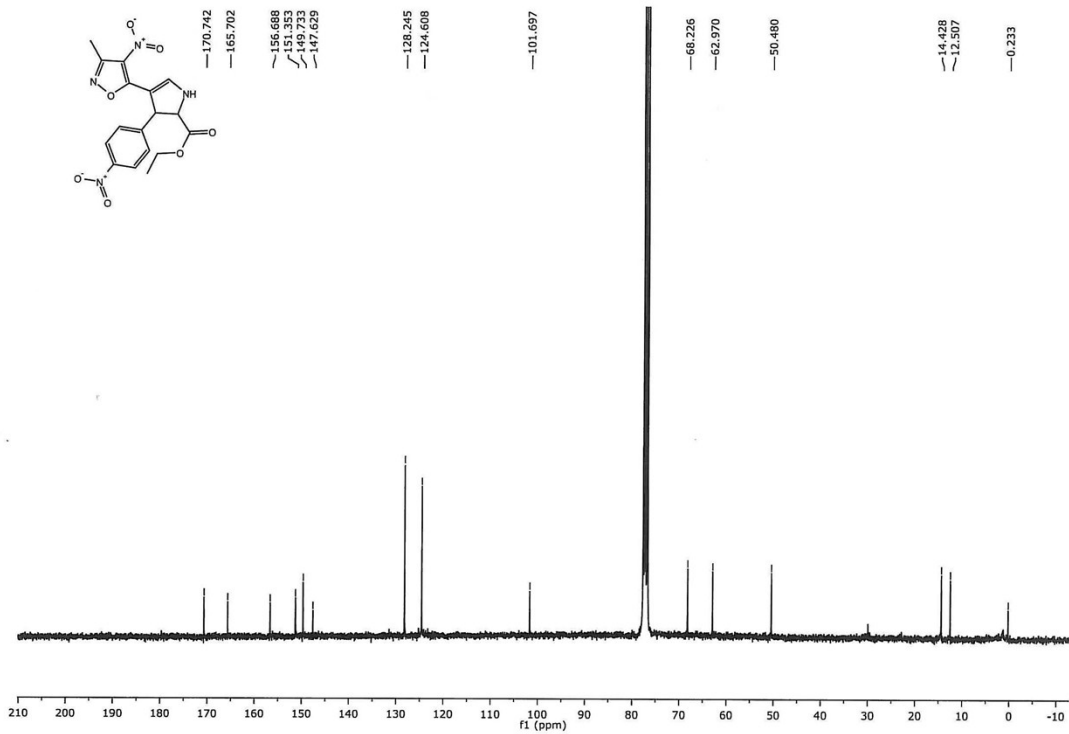

# DEFAULT REPORT

| Peak # | Component Name | Time [min] | Area [uV*sec] | Height [uV] | Area [%] | Norm. Area [%] | Cal. Range | Volt Range | BL  | Raw Amount | Adjusted Amount |
|--------|----------------|------------|---------------|-------------|----------|----------------|------------|------------|-----|------------|-----------------|
| 1      |                | 38.955     | 2298795.81    | 29737.88    | 49.79    | 49.79          |            |            | *MM | 2.2988     | 2.2988          |
| 2      |                | 45.166     | 2318266.75    | 27173.20    | 50.21    | 50.21          |            |            | *MM | 2.3183     | 2.3183          |
|        |                |            | 4617062.56    | 56910.89    | 100.00   | 100.00         |            |            |     | 4.6171     | 4.6171          |

Missing Component Report  
Component Expected Retention (Calibration File)

All components were found

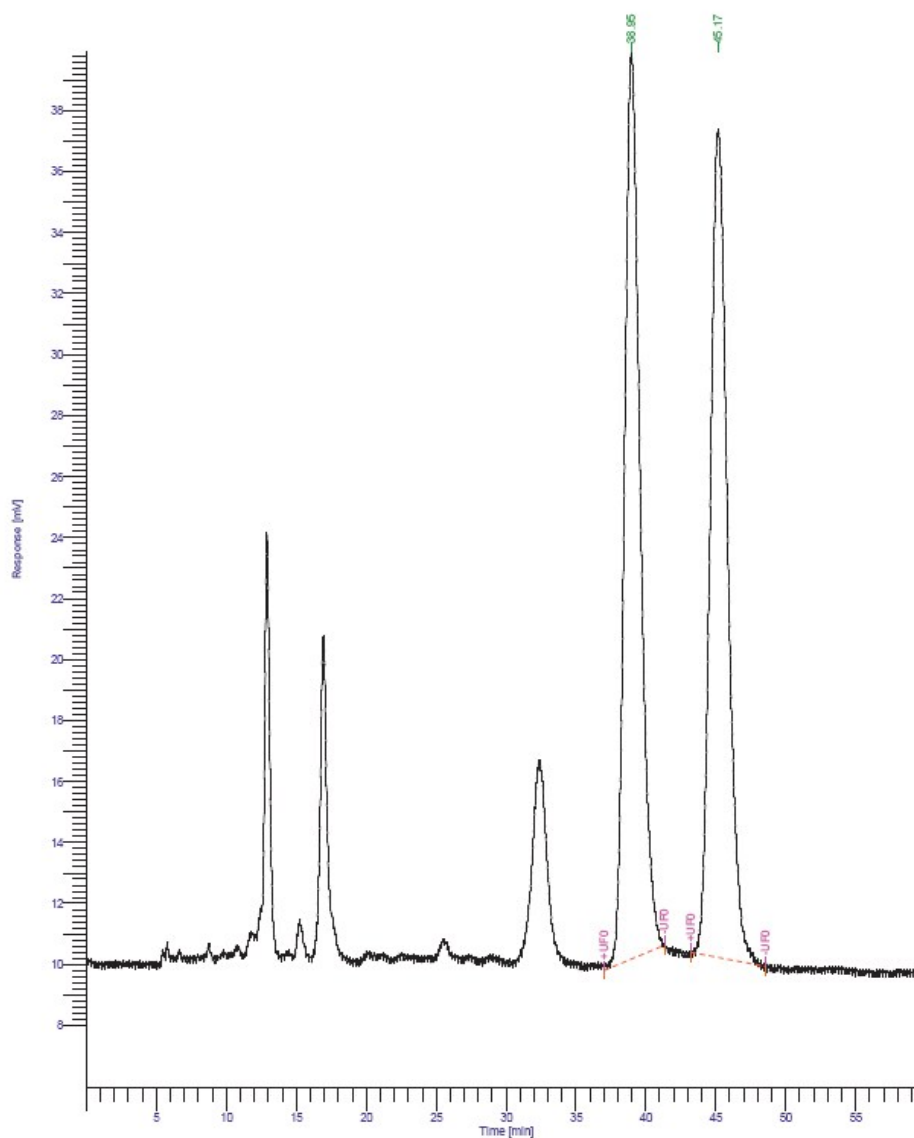

Compound 4i

# DEFAULT REPORT

| Peak # | Component Name | Time [min] | Area [uV*sec] | Height [uV] | Area [%] | Norm. Area [%] | Cal. Range | Volt Range | BL  | Raw Amount | Adjusted Amount |
|--------|----------------|------------|---------------|-------------|----------|----------------|------------|------------|-----|------------|-----------------|
| 1      |                | 39.314     | 3818233.72    | 46749.54    | 93.89    | 93.89          |            |            | *MM | 3.8182     | 3.8182          |
| 2      |                | 45.877     | 248593.85     | 3066.21     | 6.11     | 6.11           |            |            | *MM | 0.2486     | 0.2486          |
|        |                |            | 4086827.57    | 49815.75    | 100.00   | 100.00         |            |            |     | 4.0668     | 4.0668          |

Missing Component Report  
Component Expected Retention (Calibration File)

All components were found

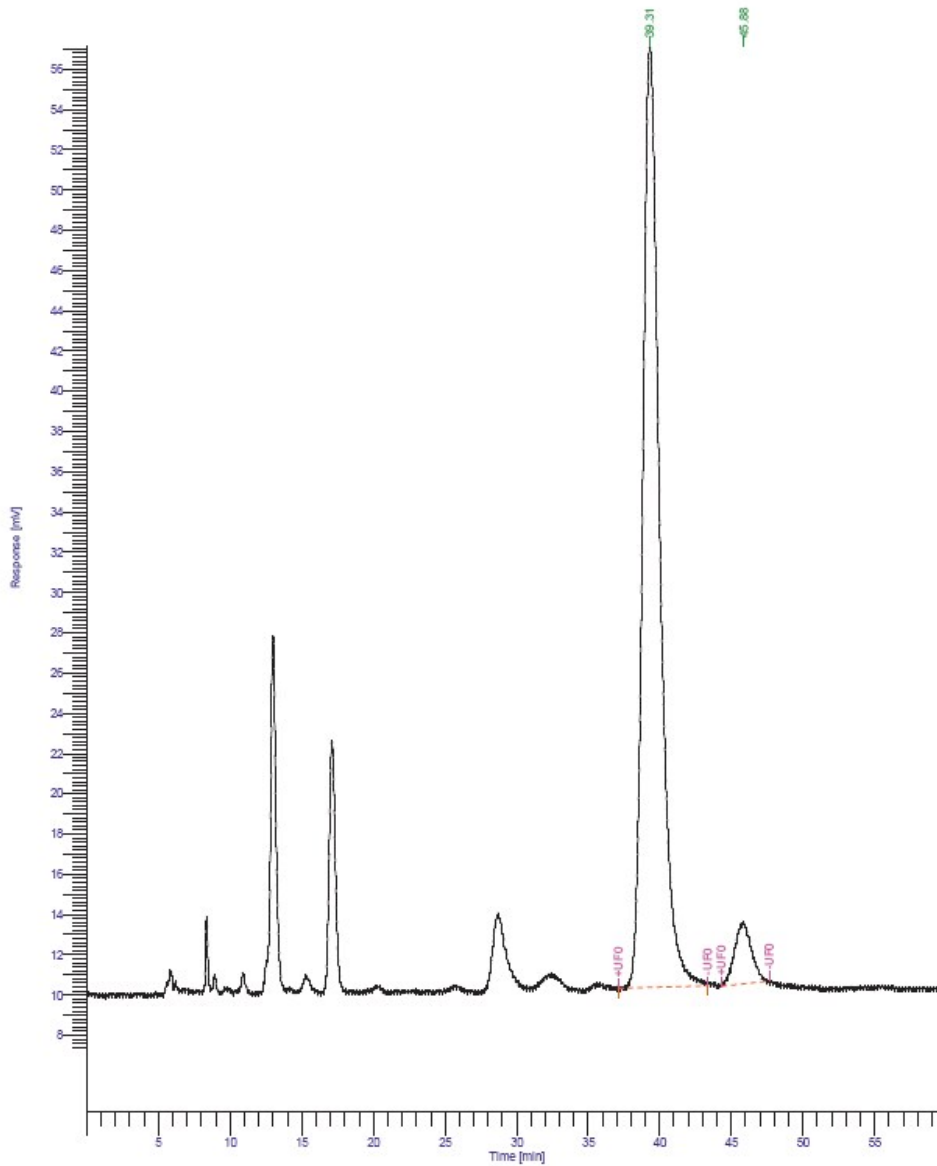

# Compound 3j

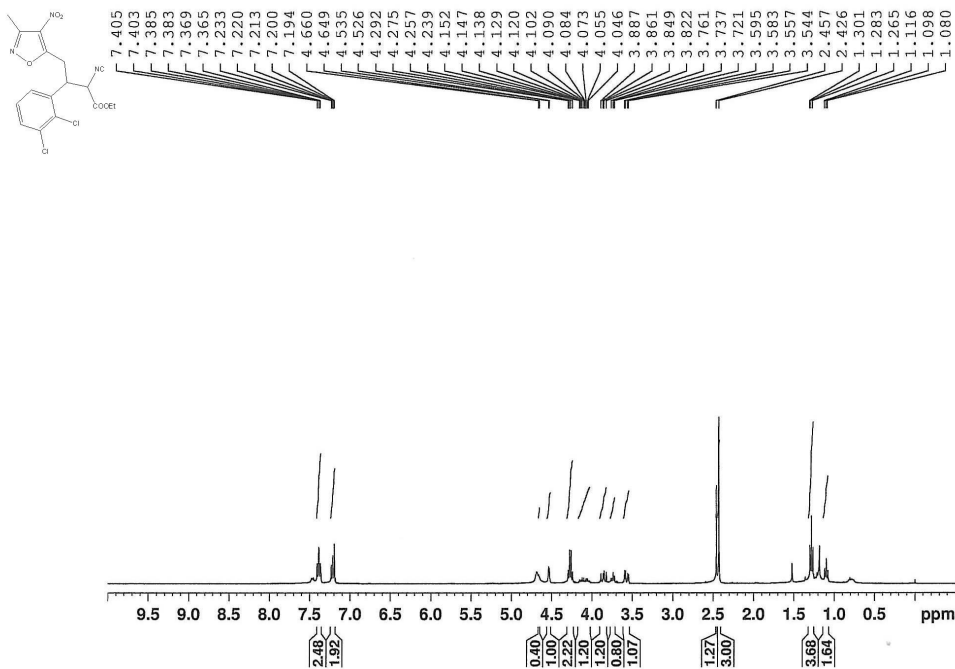

Current Data Parameters  
 NAME P50-337  
 EXPNO 1  
 PROCNO 1  
 F2 - Acquisition Parameters  
 Date\_ 20161016  
 Time 21.15  
 INSTRUM spect  
 PULPROG 5 mm WALTZ16  
 TD 65536  
 SOLVENT CDCl3  
 NS 16  
 DS 4  
 FWHZ 8221.660 Hz  
 AQ 0.115483 Hz  
 GC 3.884628 sec  
 RG 256  
 RW 60.820 sec  
 SM 0.00 sec  
 TE 295.2 K  
 SI 1.0000000 sec  
 LDO

===== CHANNEL f1 =====  
 NUC1 13C  
 P1 19.12 usec  
 PL1 -1.00 dB  
 PR1 456.1324110 MHz  
 F2 - Processing parameters  
 SI 12768  
 SF 456.1302110 MHz  
 WDW EM  
 SSB 0  
 LB 0.30 Hz  
 GB 0  
 PC 1.00

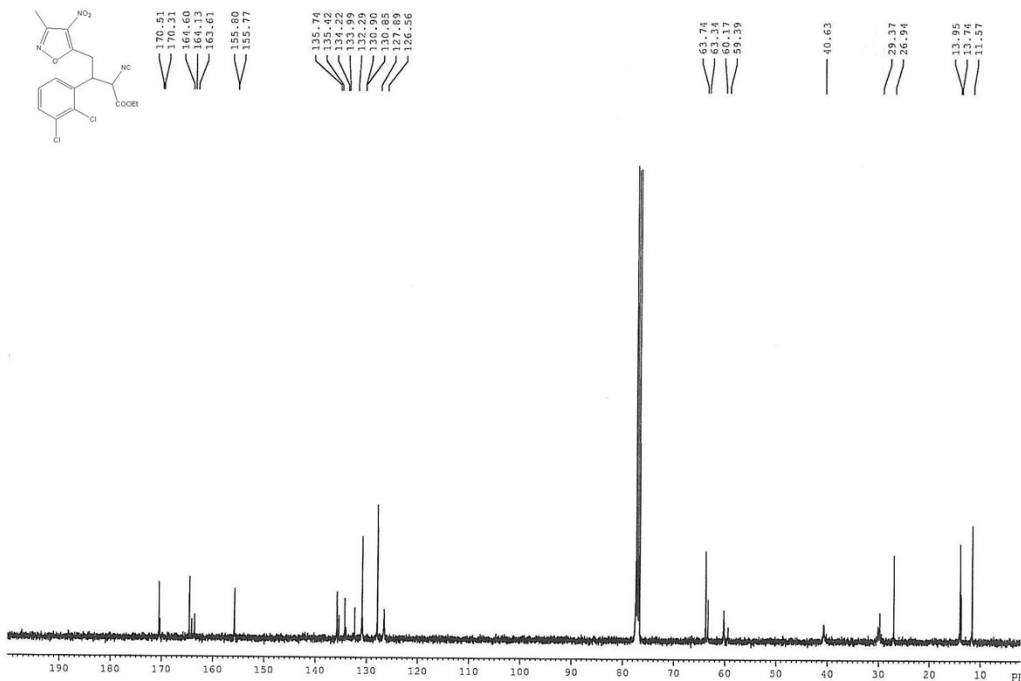

Compound 4j

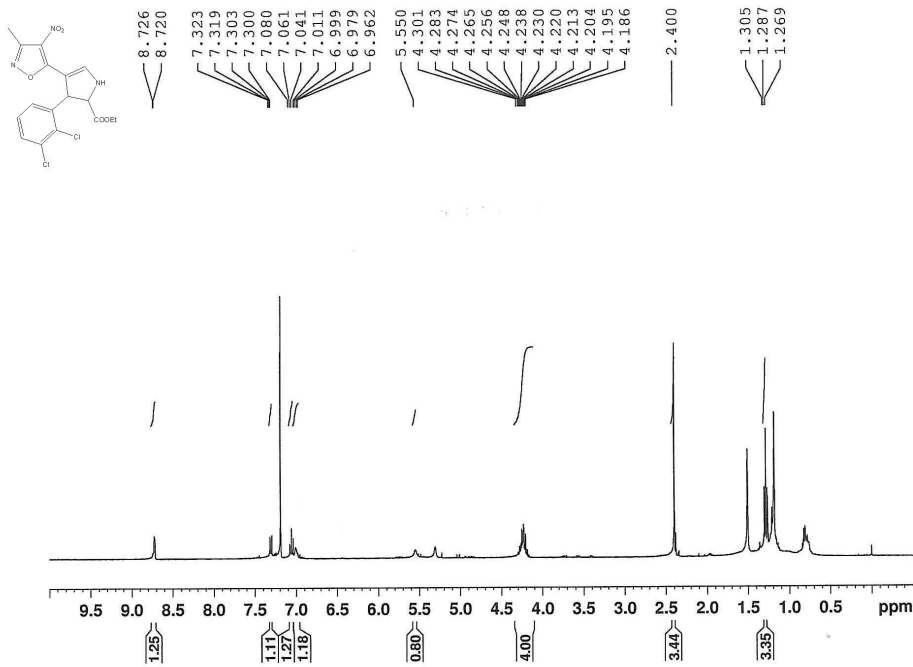

```

Current Data Parameters
NAME      PAO-3376a
EXPNO    1
PROCNO   1

F2 - Acquisition Parameters
Date_    20101018
Time     9.19
INSTRUM  spect
PROBHD   5 mm HARP003
PULPROG  zg30
TD        65536
SOLVENT  CDCl3
SI        16
DS        4
SHE       9223.680 Hz
FIDRES   0.123493 Hz
AQ        3.8466371 sec
RG         511
SFO        400.130365 MHz
RG         60.800 usec
DE         6.00 usec
TE        295.2 K
SI        1.00000000 sec
TD         1

===== CHANNEL f1 =====
NUC1      13
P1        13.12 usec
PL        -2.00 dB
SFO1     400.130365 MHz

F2 - Processing parameters
SI        32768
SF        400.130365 MHz
WDW       EM
SSB       0
LB        0.30 Hz
GB        0
PC        1.00
    
```

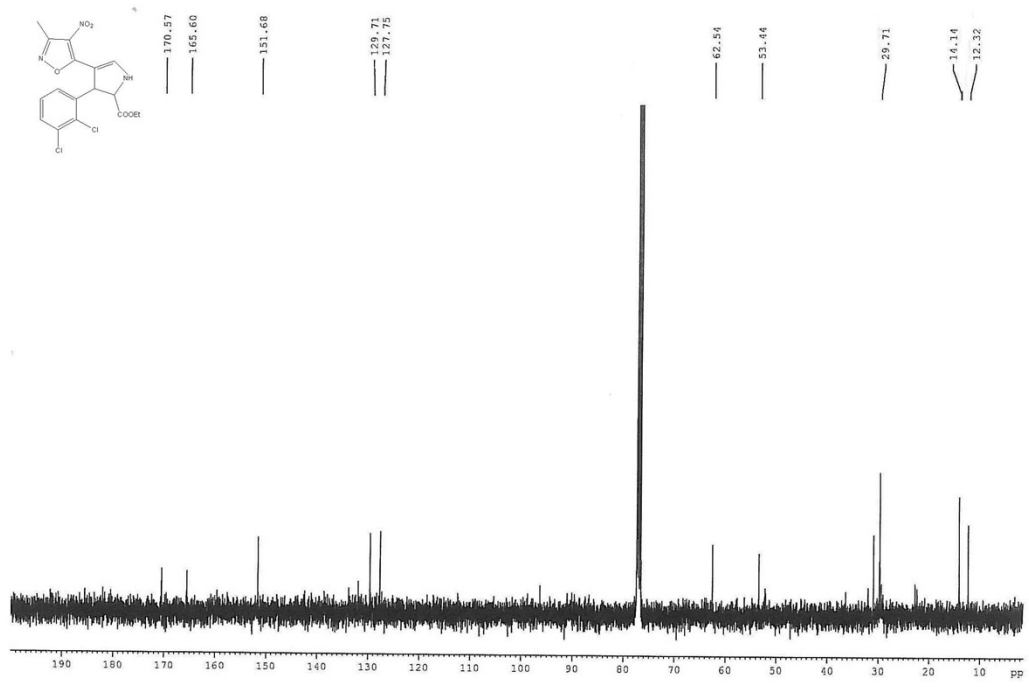

# DEFAULT REPORT

| Peak # | Component Name | Time [min] | Area [uV*sec] | Height [uV] | Area [%] | Norm. Area [%] | Cal. Range | Volt Range | BL  | Raw Amount | Adjusted Amount |
|--------|----------------|------------|---------------|-------------|----------|----------------|------------|------------|-----|------------|-----------------|
| 1      |                | 18.539     | 1430627.11    | 43764.08    | 50.59    | 50.59          |            |            | *MM | 1.4306     | 1.4306          |
| 2      |                | 20.739     | 1397103.17    | 38675.48    | 49.41    | 49.41          |            |            | *MM | 1.3971     | 1.3971          |
|        |                |            | 2827730.27    | 82439.56    | 100.00   | 100.00         |            |            |     | 2.8277     | 2.8277          |

Missing Component Report  
Component Expected Retention (Calibration File)

All components were found

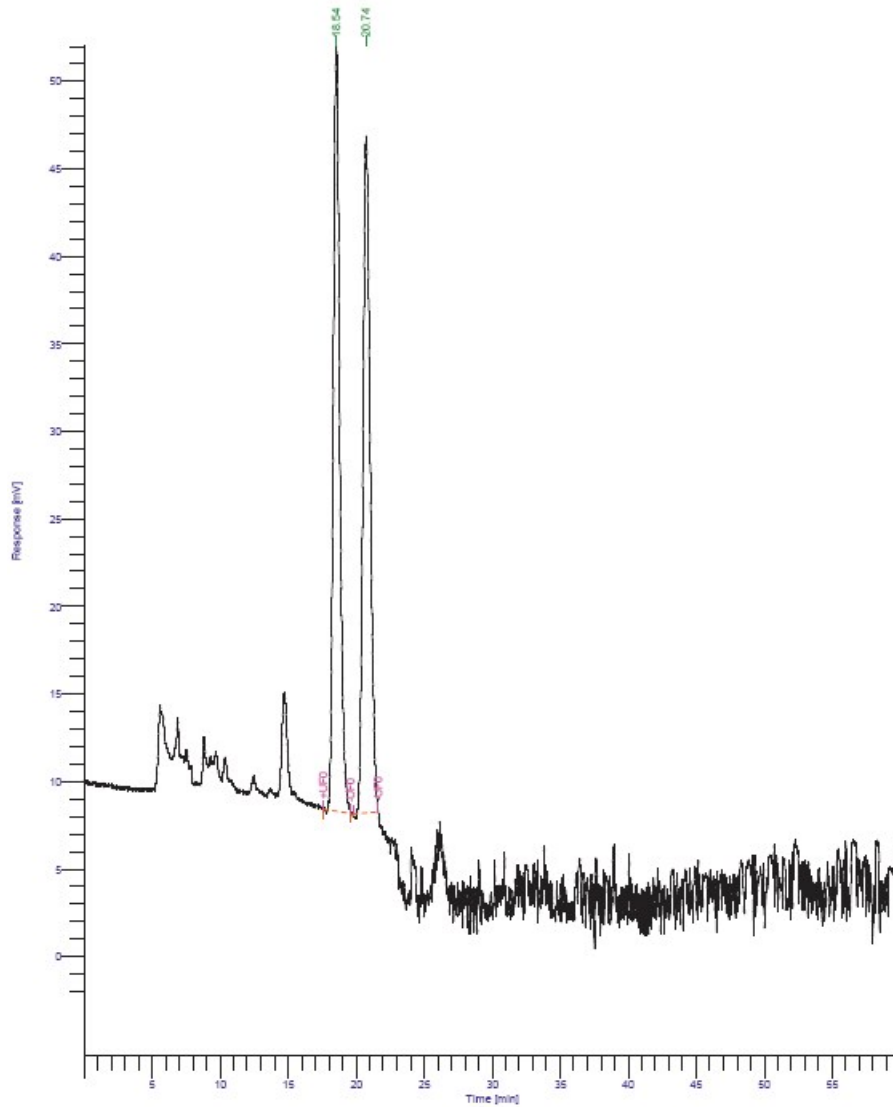



Compound 4j

DEFAULT REPORT

| Peak # | Component Name | Time [min] | Area [uV*sec] | Height [uV] | Area [%] | Norm. Area [%] | Cal. Range | Volt Range | BL  | Raw Amount | Adjusted Amount |
|--------|----------------|------------|---------------|-------------|----------|----------------|------------|------------|-----|------------|-----------------|
| 1      |                | 18.751     | 2301634.58    | 74000.52    | 6.22     | 6.22           |            |            | *MM | 2.3016     | 2.3016          |
| 2      |                | 20.702     | 34872464.36   | 856521.29   | 93.78    | 93.78          |            |            | *MM | 34.8725    | 34.8725         |
|        |                |            | 36974098.94   | 930521.80   | 100.00   | 100.00         |            |            |     | 36.9741    | 36.9741         |

Missing Component Report  
Component Expected Retention (Calibration File)

All components were found

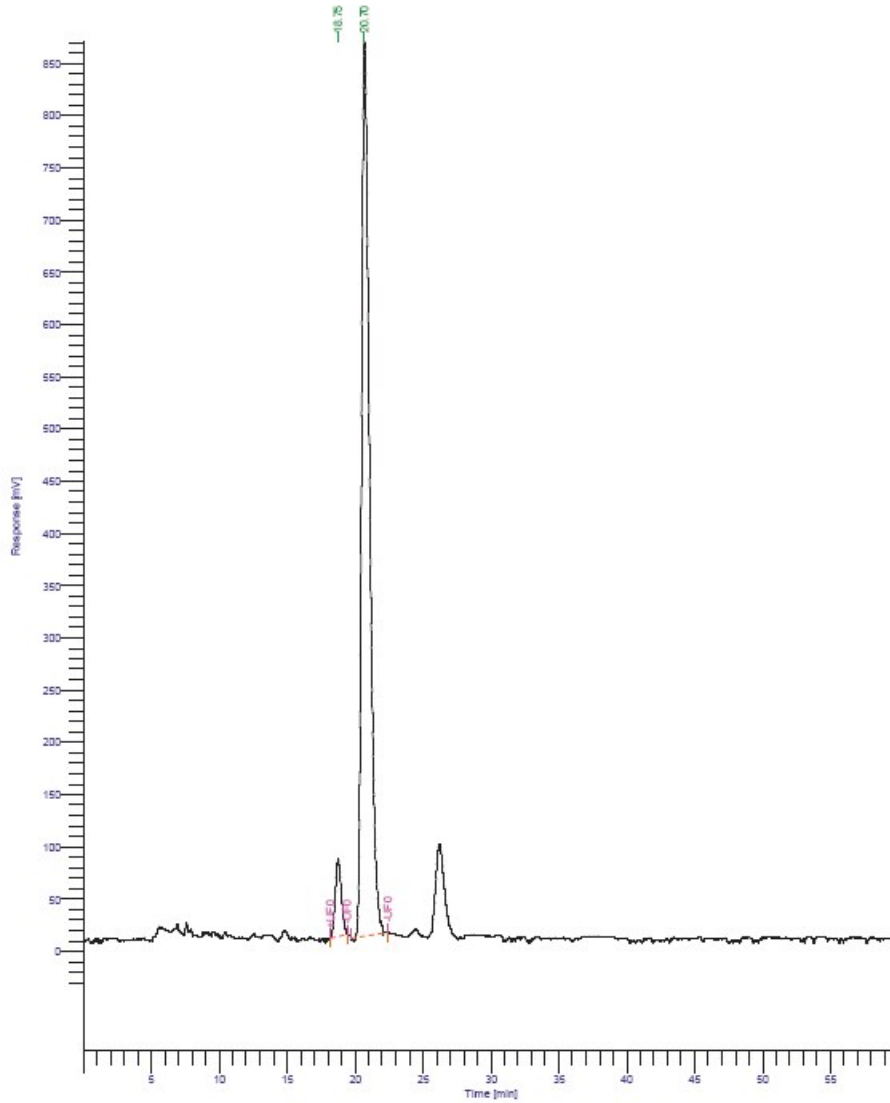

# Compound 3k

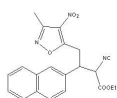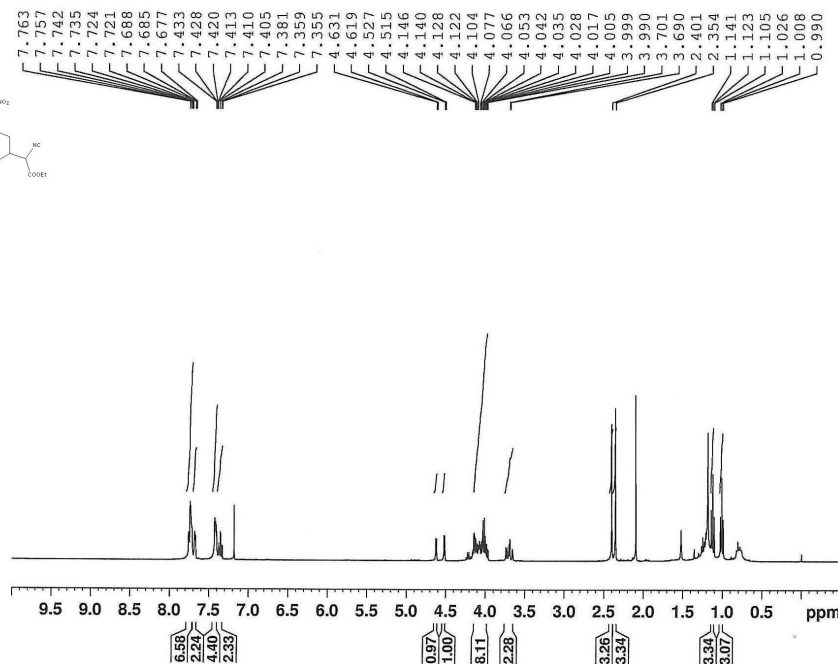

```

===== Data Parameters =====
NAME      P40-333
EXPNO    1
PROCNO   1

===== Acquisition Parameters =====
DATE_    20101016
TIME     20.06
INSTRUM  spect
PROBHD   5 mm PABBO BB
PULPROG  zgpg30
TD        65536
SOLVENT  CDCl3
NS        16
DS        4
SWH       8223.668 Hz
FIDRES    0.129493 Hz
AQ         3.2846817 sec
RG         328
WDW        EM
SSB        0
LB         60.800 Hz
GB         0
TE         295.2 K
DQ         1.00000000 sec
TD0

===== CHANNEL f1 =====
NUC1      1H
P1         13.12 usec
PL1       -1.90 dB
SFO1      400.1324110 MHz

===== Processing parameters =====
SI         32768
SF         400.1300199 MHz
WDW        EM
SSB        0
LB         0.30 Hz
GB         0
TE         1.00
  
```

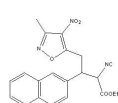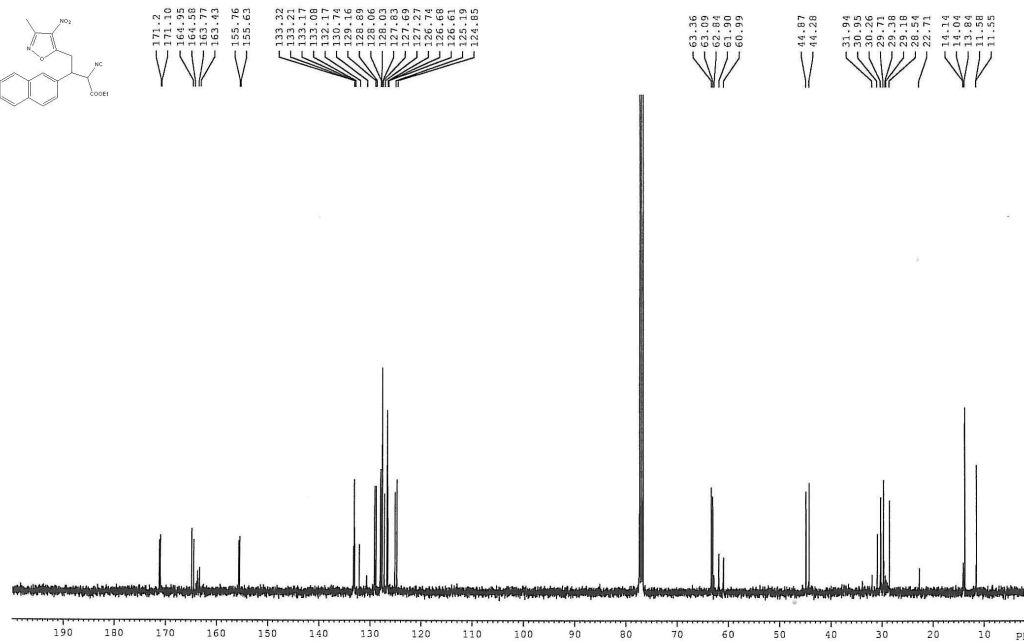

# Compound 4k

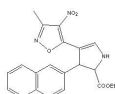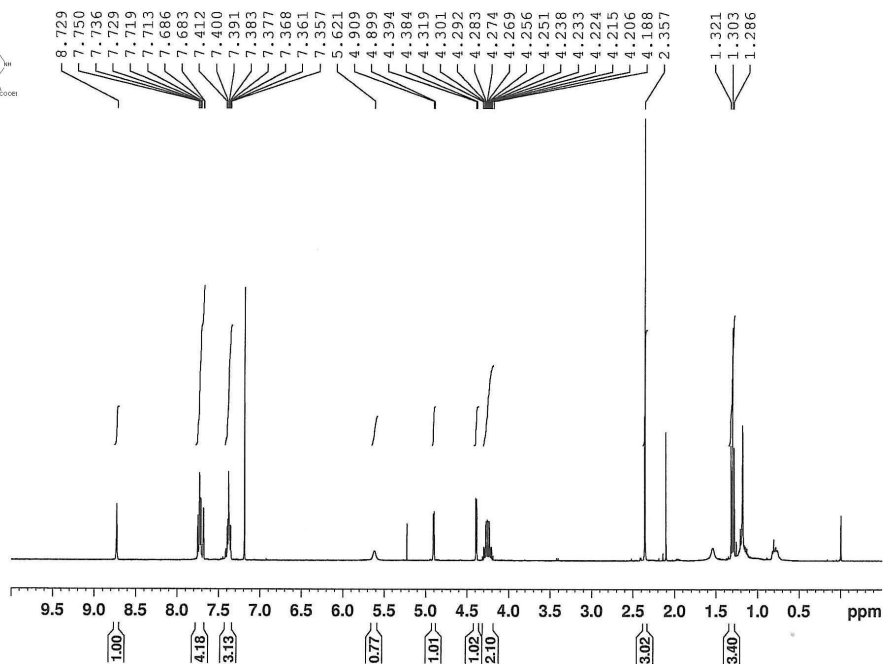

```

Current Data Parameters
NAME:  P40-3331a2
EXPNO:  1
PROCNO:  1
F2 - Acquisition Parameters
Date_   :  20101002
Time    :  17.25
INSTRUM :  spect
PROBHD  :  5 mm PABBO BBO
PULPROG :  zgpg30
SOLVENT :  CDCl3
NS      :  654
DS      :  4
SWH     :  8231.683 Hz
FIDRES  :  0.125883 Hz
AQ      :  3.1864287 sec
RG      :  600
EM      :  6.00
DE      :  0.300 sec
TE      :  300.2 K
SI      :  1.00000000 sec
TD      :  1
===== CHANNEL f1 =====
NUC1    :  13C
P1      :  13.00 usec
PL1     :  0.00 dB
SFO1    :  400.1324710 MHz
F2 - Processing parameters
SI      :  32768
SF      :  400.1300377 MHz
WDW     :  EM
SSB     :  0
LB      :  0.30 Hz
GB      :  0
PC      :  1.00
    
```

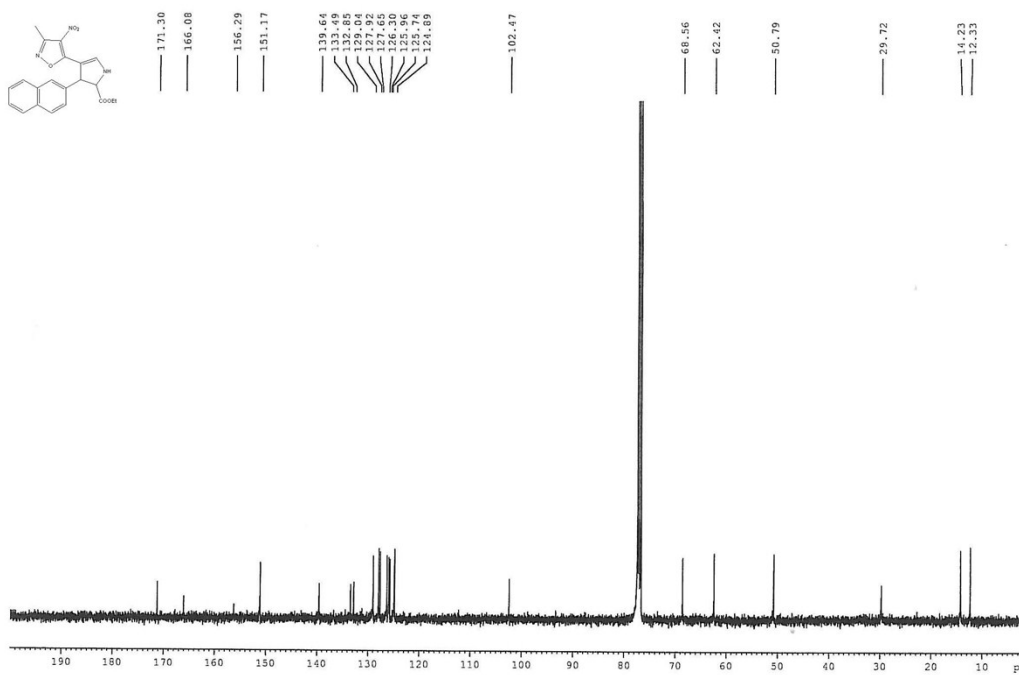

# DEFAULT REPORT

| Peak # | Component Name | Time [min] | Area [ $\mu\text{V}\cdot\text{sec}$ ] | Height [ $\mu\text{V}$ ] | Area [%] | Norm. Area [%] | Cal. Range | Volt Range | BL  | Raw Amount | Adjusted Amount |
|--------|----------------|------------|---------------------------------------|--------------------------|----------|----------------|------------|------------|-----|------------|-----------------|
| 1      |                | 22.352     | 29048951.17                           | 684614.50                | 49.48    | 49.48          |            |            | *MM | 29.0490    | 29.0490         |
| 2      |                | 32.589     | 29664832.13                           | 500481.09                | 50.52    | 50.52          |            |            | *MM | 29.6648    | 29.6648         |
|        |                |            | 58713783.30                           | 1.19e+06                 | 100.00   | 100.00         |            |            |     | 58.7138    | 58.7138         |

Missing Component Report  
 Component Expected Retention (Calibration File)

All components were found

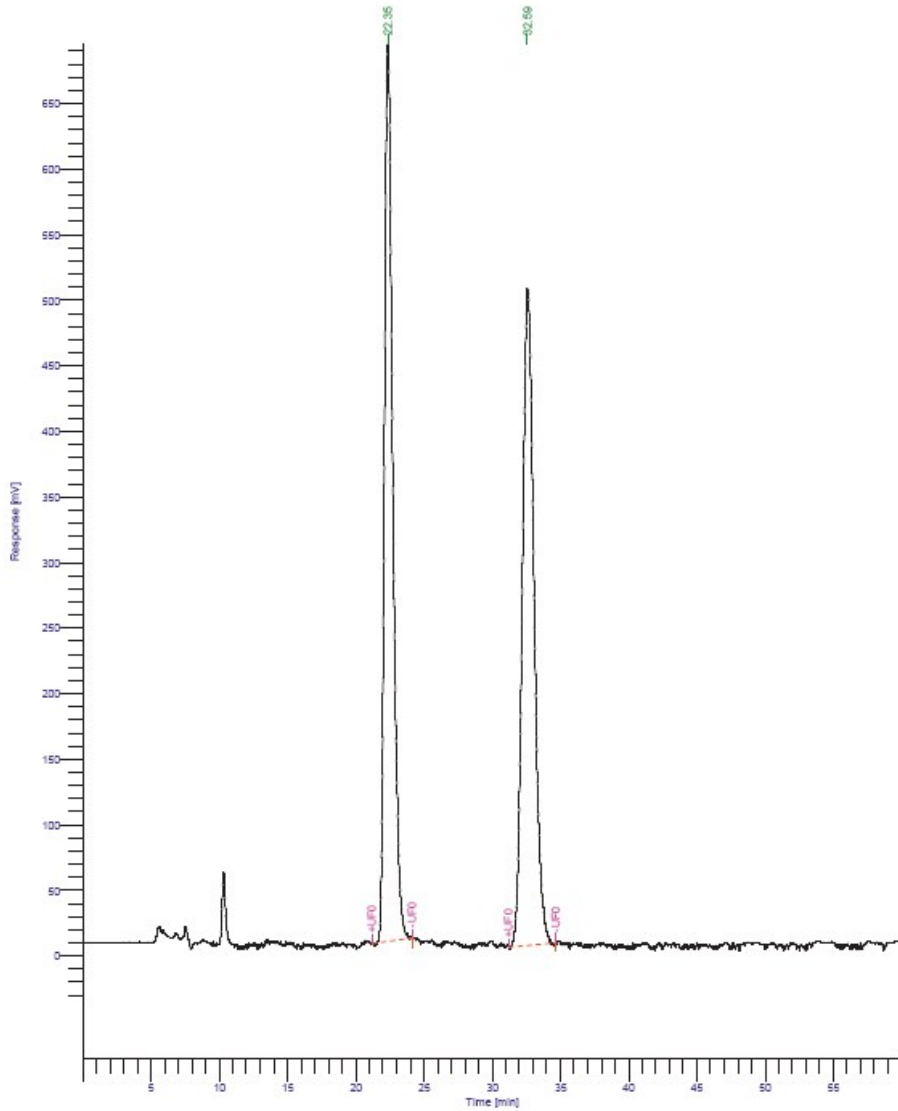

# Compound 4k

## DEFAULT REPORT

| Peak # | Component Name | Time [min] | Area [uV*sec] | Height [uV] | Area [%] | Norm. Area [%] | Cal. Range | Volt Range | BL  | Raw Amount | Adjusted Amount |
|--------|----------------|------------|---------------|-------------|----------|----------------|------------|------------|-----|------------|-----------------|
| 1      |                | 22.896     | 5504830.35    | 126372.33   | 93.23    | 93.23          |            |            | *MM | 5.5048     | 5.5048          |
| 2      |                | 33.807     | 399618.22     | 6647.49     | 6.77     | 6.77           |            |            | *MM | 0.3996     | 0.3996          |
|        |                |            | 5904448.57    | 133019.82   | 100.00   | 100.00         |            |            |     | 5.9044     | 5.9044          |

Missing Component Report  
Component Expected Retention (Calibration File)

All components were found

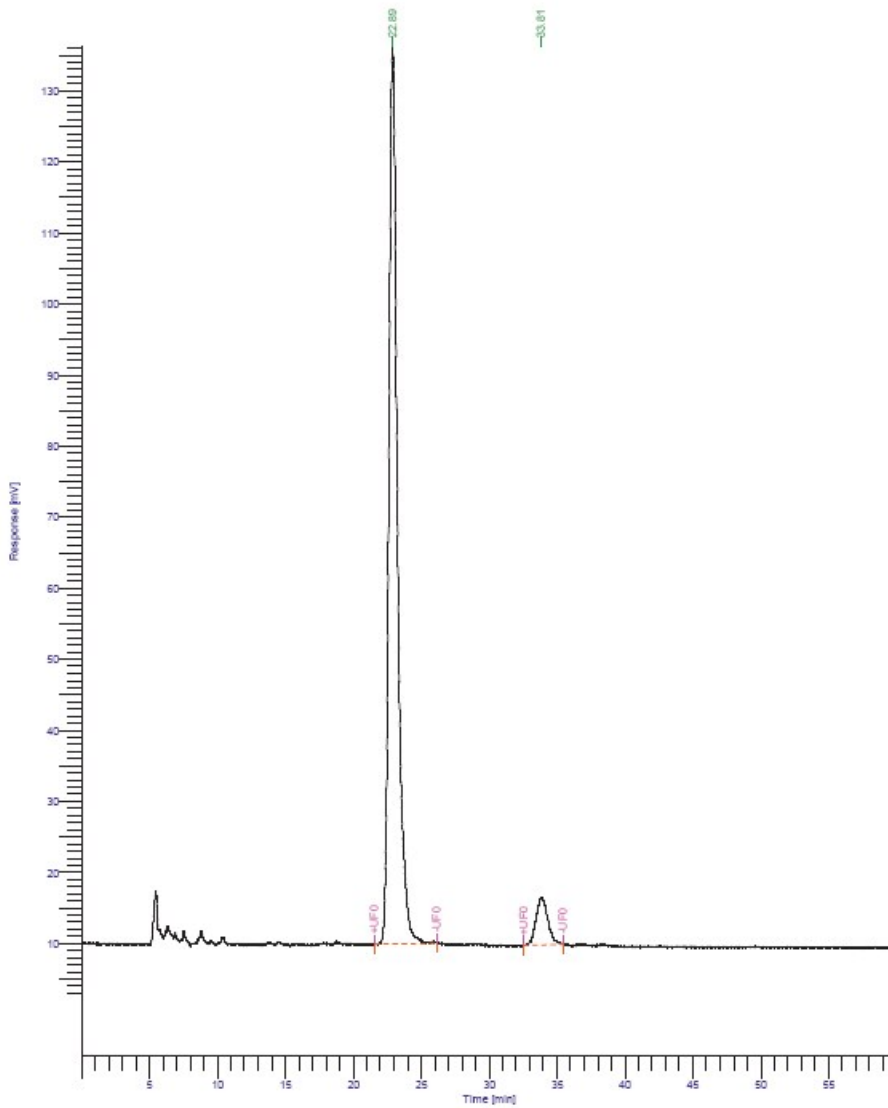

Compound 3l

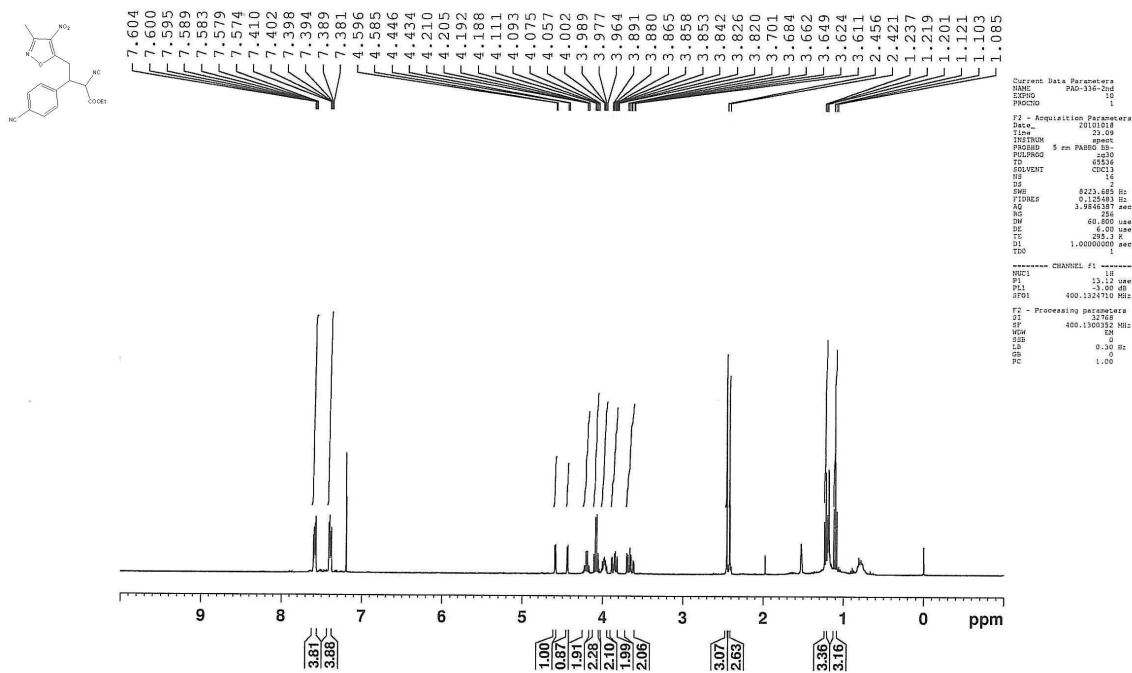

Current Data Parameters  
 NAME: P80-316-10d  
 EXPNO: 10  
 PROCNO: 1  
 F2 - Acquisition Parameters  
 Date\_: 20101018  
 Time: 23.00  
 INSTRUM: spect  
 PROBHD: 3 mm PARAB  
 PULPROG: zgpg30  
 TD: 65536  
 SOLVENT: CDCl3  
 NS: 16  
 DS: 4  
 SWH: 8223.485 Hz  
 FIDRES: 0.129483 Hz  
 AQ: 3.9846387 sec  
 RG: 356  
 DM: 60.000 umm  
 HF: 6.000 umm  
 TC: 285.3 K  
 D1: 1.00000000 sec  
 TDC: 1  
 ----- CHANNEL f1 -----  
 NUC1: 13  
 P1: 13.12 umm  
 PL1: -3.00 dB  
 SFO1: 400.132710 MHz  
 F2 - Processing parameters  
 DT: 33768  
 SF: 400.130332 MHz  
 WHW: EN  
 LB: 0.30 Hz  
 GB: 0  
 PC: 1.00

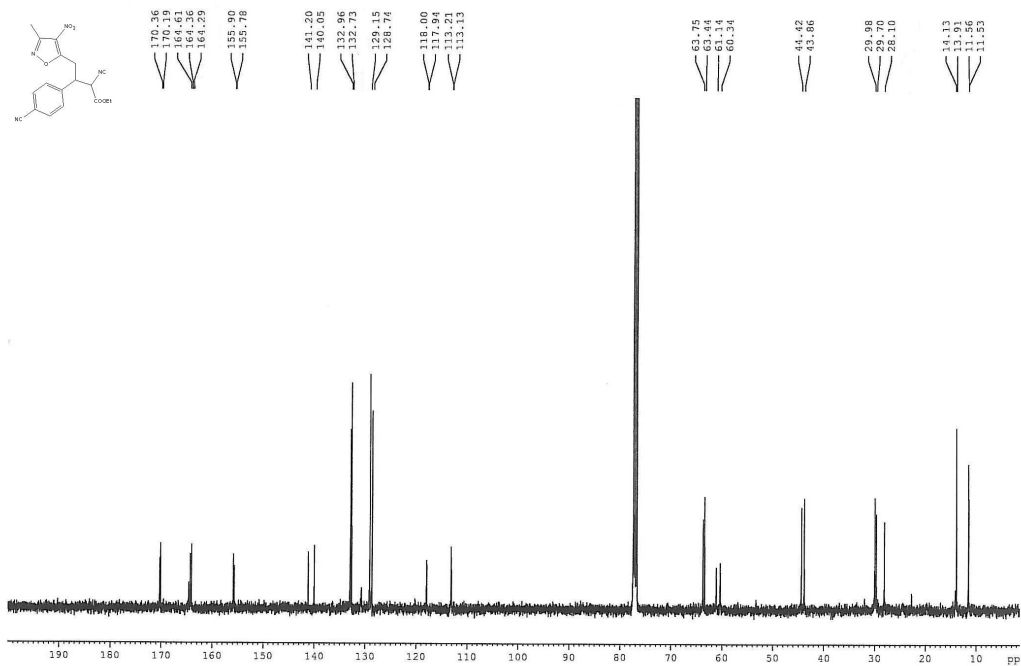

# Compound 4l

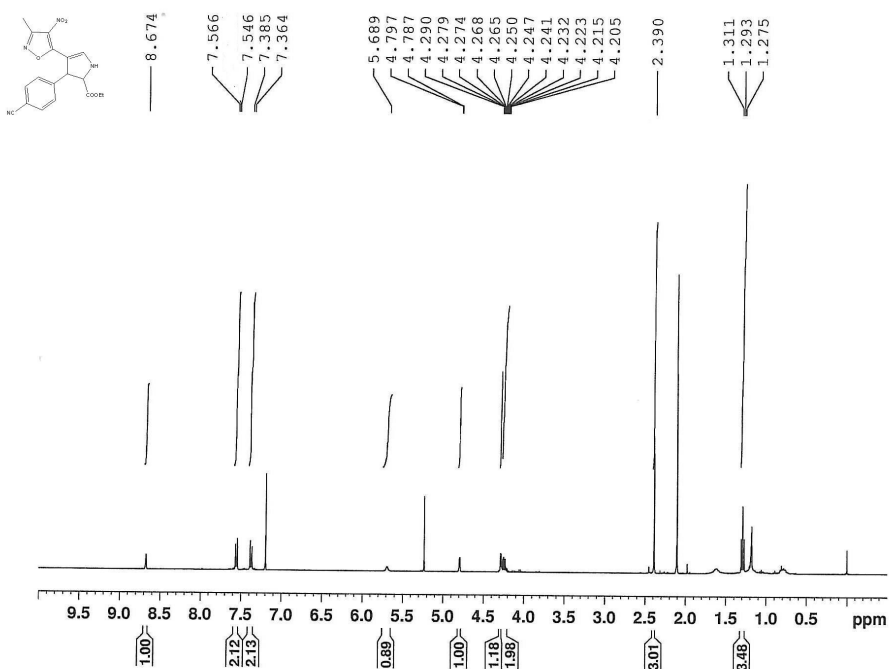

Current Data Parameters  
 NAME P40-33612  
 EXPNO 10  
 PROCNO 1  
 F2 - Acquisition Parameters  
 Date\_ 20101026  
 Time 10.11  
 INSTRUM spect  
 PROBHD 5 mm P400 SP-  
 PULPROG zgpg30  
 TD 65536  
 SFO 400.132710  
 SOLVENT cdcl3  
 NS 14  
 DS 3  
 SWH 8233.685 Hz  
 FWHM 0.122503 Hz  
 AQ 3.9846387 sec  
 RG 382  
 DW 60.800 usec  
 DE 4.00 usec  
 TE 298.0 K  
 D1 1.0000000 sec  
 TDO 1  
 ----- CHANNEL F1 -----  
 NUC1 1H  
 P1 18  
 PL1 13.00 usec  
 SFO1 400.132710 MHz  
 F2 - Processing parameters  
 SI 32768  
 SF 400.130354 MHz  
 DS 4  
 MDW 64  
 SFO 400.130354 MHz  
 GB 0  
 GBW 0.30 Hz  
 GBG 0  
 GBV 1.00

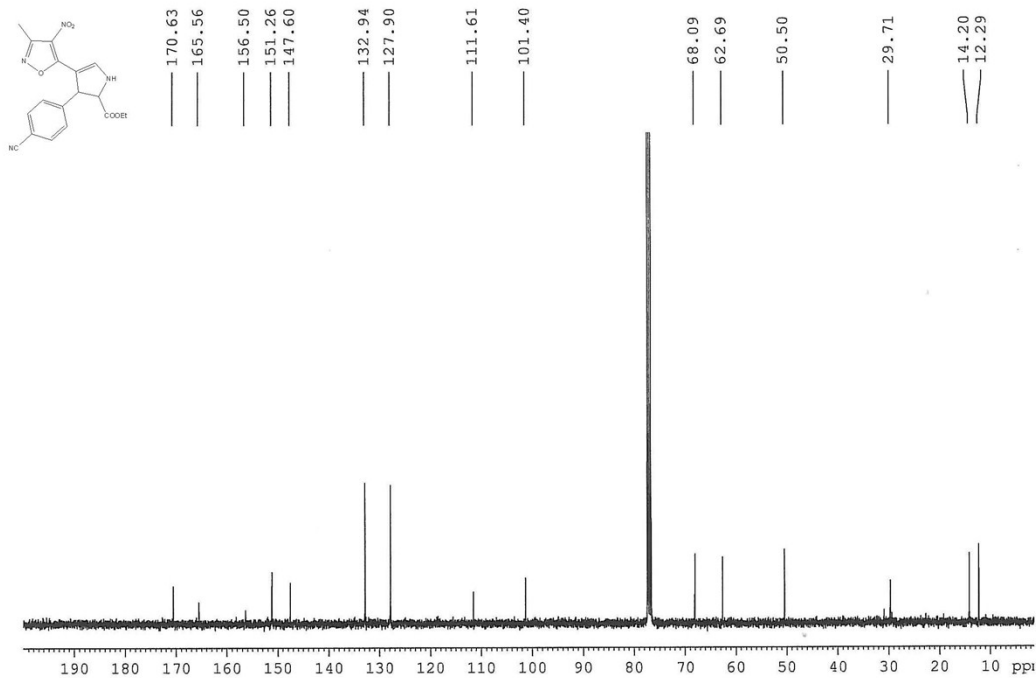

# DEFAULT REPORT

| Peak # | Component Name | Time [min] | Area [uV*sec] | Height [uV] | Area [%] | Norm. Area [%] | Cal. Range | Volt Range | BL  | Raw Amount | Adjusted Amount |
|--------|----------------|------------|---------------|-------------|----------|----------------|------------|------------|-----|------------|-----------------|
| 1      |                | 37.033     | 9320890.18    | 118329.75   | 50.03    | 50.03          |            |            | *MM | 9.3209     | 9.3209          |
| 2      |                | 46.845     | 9311256.89    | 102801.55   | 49.97    | 49.97          |            |            | *MM | 9.3113     | 9.3113          |
|        |                |            | 18632147.07   | 221131.31   | 100.00   | 100.00         |            |            |     | 18.6321    | 18.6321         |

Missing Component Report  
 Component Expected Retention (Calibration File)

All components were found

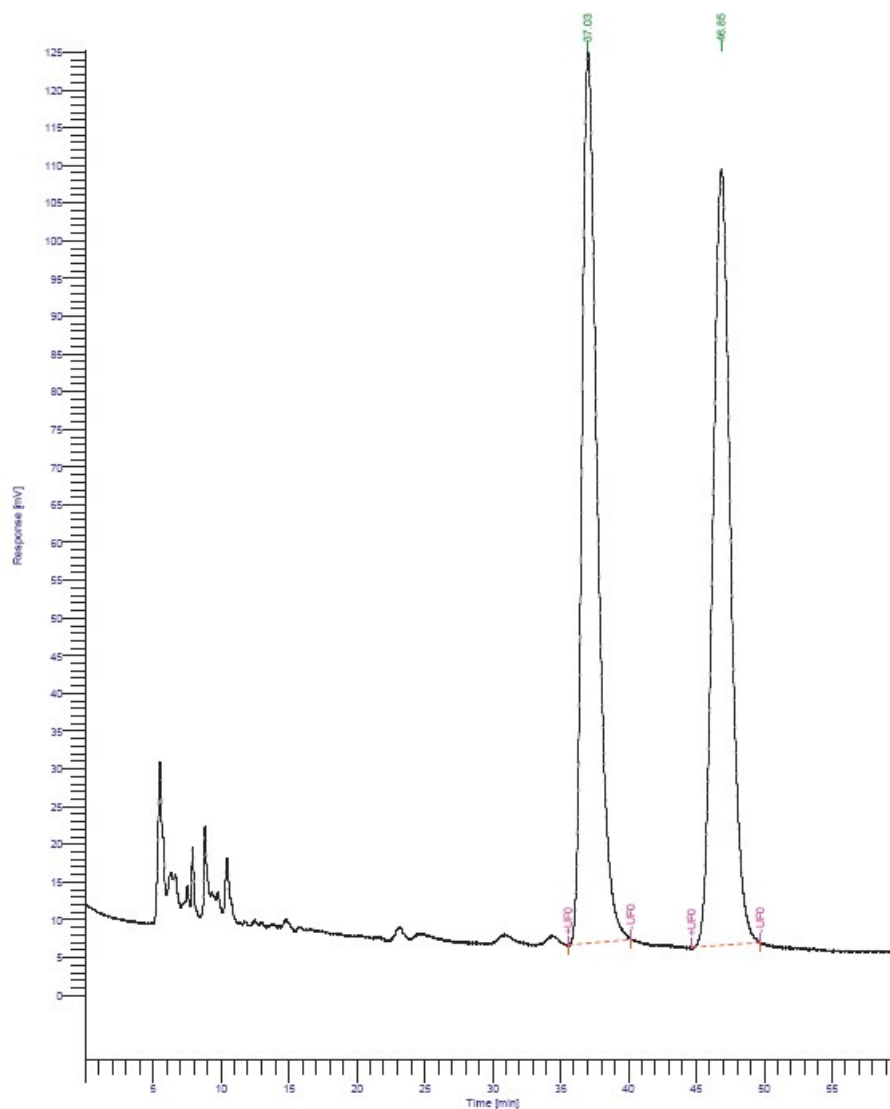



# Compound 4I

## DEFAULT REPORT

| Peak # | Component Name | Time [min] | Area [uV*sec] | Height [uV] | Area [%] | Norm. Area [%] | Cal. Range | Volt Range | BL  | Raw Amount | Adjusted Amount |
|--------|----------------|------------|---------------|-------------|----------|----------------|------------|------------|-----|------------|-----------------|
| 1      |                | 36.417     | 13374824.13   | 169607.58   | 93.35    | 93.35          |            |            | *MM | 13.3748    | 13.3748         |
| 2      |                | 46.149     | 952769.30     | 11303.15    | 6.65     | 6.65           |            |            | *MM | 0.9528     | 0.9528          |
|        |                |            | 14327593.43   | 180910.73   | 100.00   | 100.00         |            |            |     | 14.3276    | 14.3276         |

Missing Component Report  
Component Expected Retention (Calibration File)

All components were found

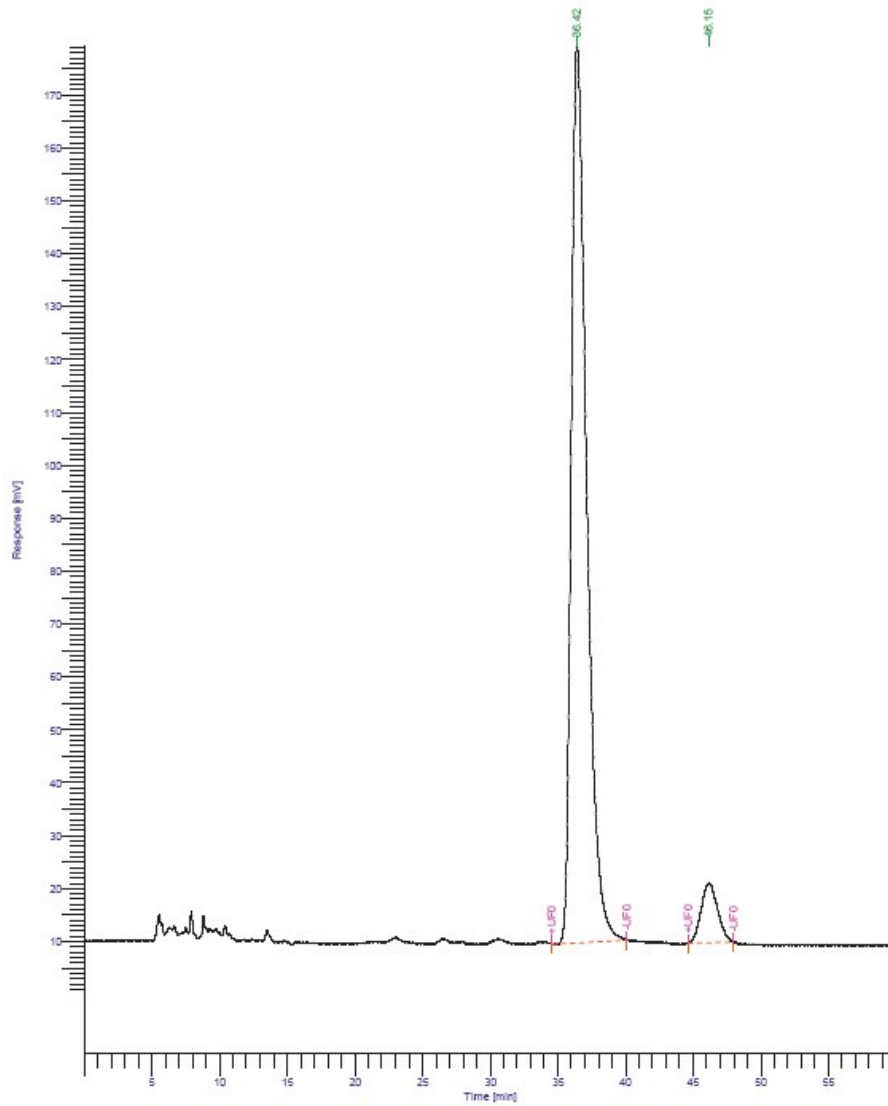

# Compound 3m

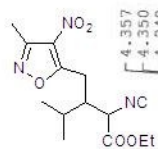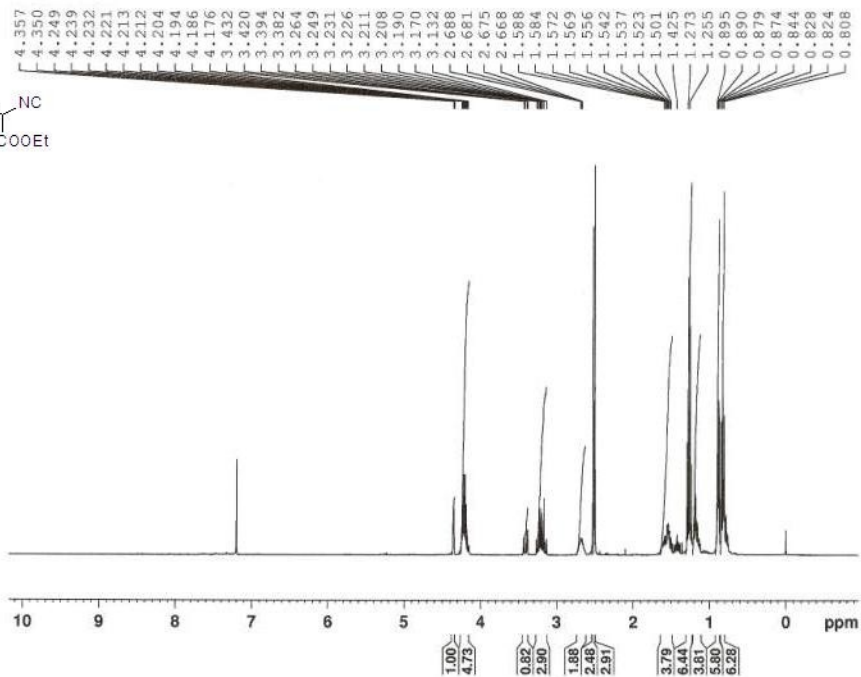

Acquisition Parameters  
 NAME: 100-34001  
 PROCNO: 1  
 Date\_: 20100917  
 Time: 15.54  
 INSTRUM: spect  
 F2PROC1: 0 sec F2AQD 90-  
 SOLVENT: CDCl3  
 ID: 45524  
 SOLVENT: CDCl3  
 NS: 128  
 DS: 4  
 SWH: 4001.040 MHz  
 FREQ1: 101.625400 MHz  
 NU1: 121  
 AQ: 3.9946307 sec  
 RG: 327  
 SW: 40.000 MHz  
 FIDRES: 0.160000 MHz  
 TD: 65536  
 SFO: 2.0000000 MHz  
 C4H: 1

CHANNEL f1  
 NUC1: 13C  
 PULPROG: zgpg30  
 SFO1: 101.625400 MHz  
 EQ2: 100.625400 MHz  
 F2 - Processing parameters  
 SI: 32768  
 SF: 400.1470000 MHz  
 WDW: EM  
 SSB: 0  
 LB: 0.30 Hz  
 GB: 0  
 PC: 1.00

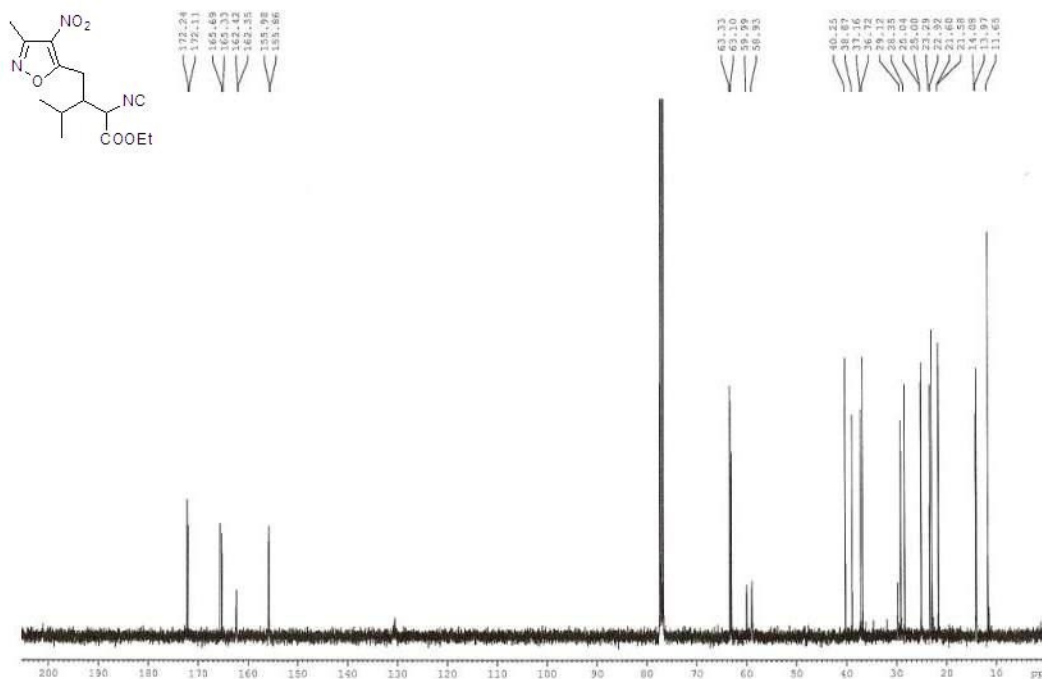

# Compound 4m

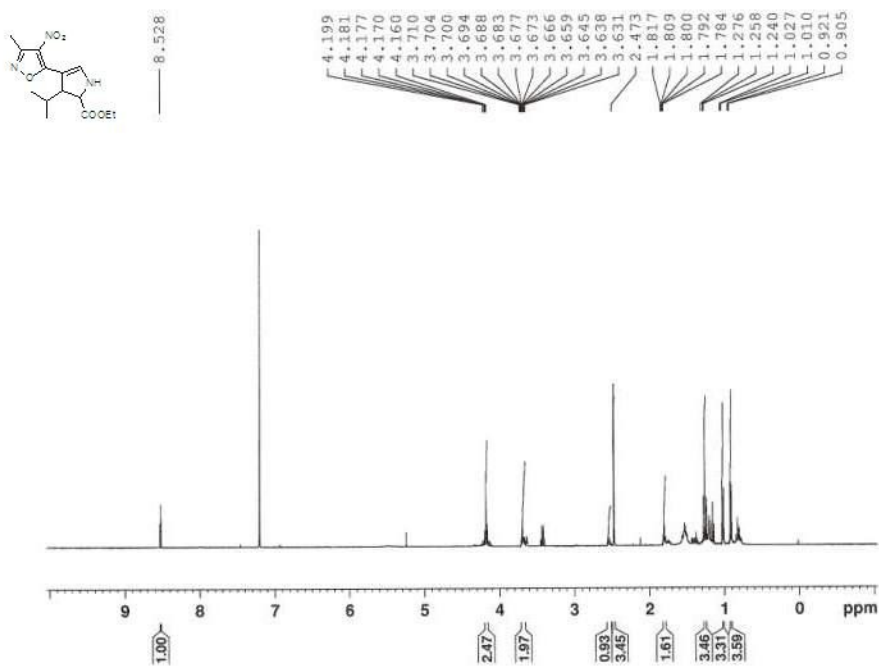

```

Current Date Parameters
NAME          860-2041a
EXPNO         10
PROCNO        1
F2 - Acquisition Parameters
Date_         01/09/18
Time         11:48
INSTRUM       spect
PROBHD        5 mm PABBO MM
PULPROG       zgpg30
SI            65536
AQ            0.021
RG            320
SOLVENT       CDCl3
NS            512
DS            4
SWH            8223.400 Hz
FIDRES        0.14188 Hz
AQRES         3.3846333 sec
RG            3776
SFO            60.132500 MHz
PC            4.00 sec
DE            280.3 Hz
TE            300.2 K
DQ            1.00000000 sec
CFO           1
===== CHANNEL f1 =====
NUC1           13
P1            12.00 usec
PL1           -1.50 dB
SFO1          400.1464713 MHz
F2 - Processing parameters
SI            65536
AQ            0.021
RG            320
SOLVENT       CDCl3
NS            512
DS            4
SWH            8223.400 MHz
PC            1.00
    
```

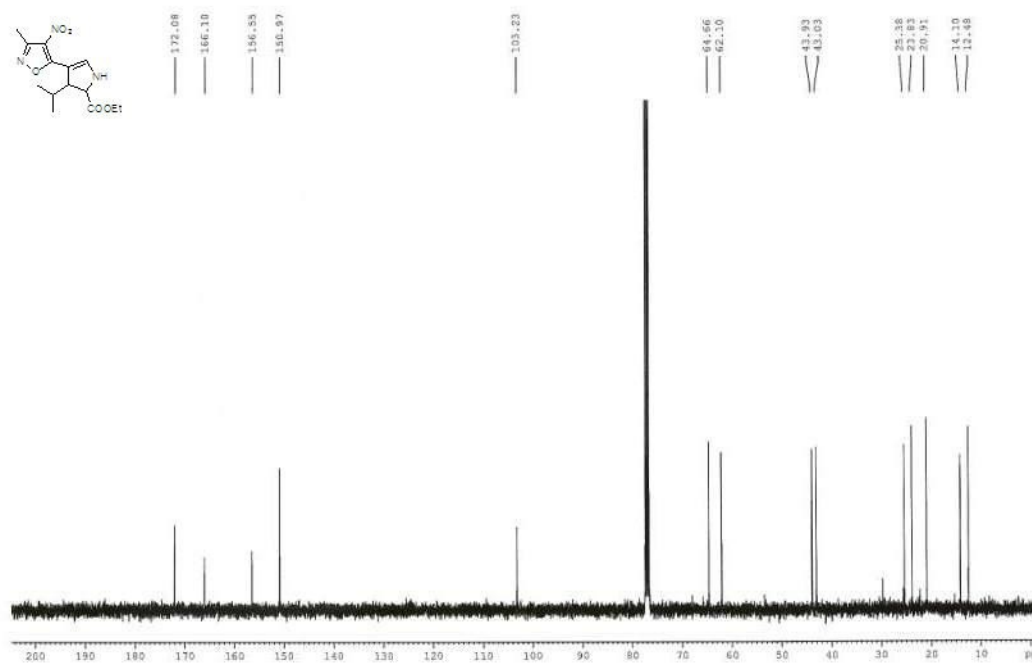

# Compound 4m

## Compound 2.20n

Sample Name : PVO-304      Sample #:      Page 1 of 1  
FileName : C:\TOTALCHROM DATA\Results\Pvo\PVO-304\PAD-304\PVO-304.ad.B207v.0.0ml.B.001.raw  
Date : 15/03/2011 14:39:24  
Method :      Time of Injection: 15/09/2010 14:58:07  
Start Time : 0.00 min      End Time : 25.91 min      Low Point : -6.57 mAU      High Point : 338.46 mAU  
Plot Offset: -6.67 mAU      Plot Scale: 247.1 mAU

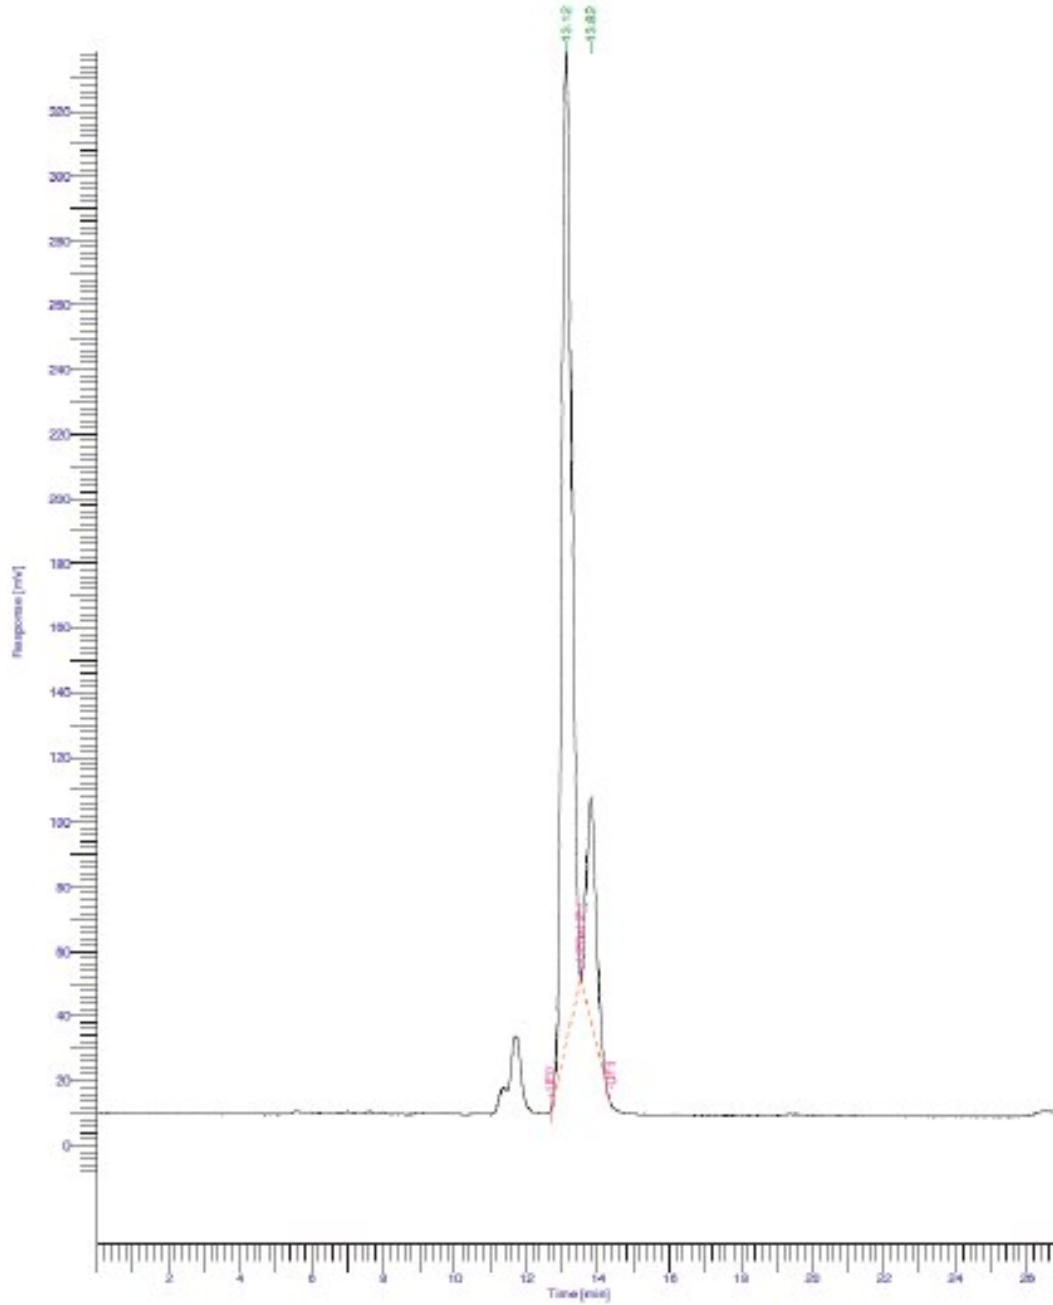

We also reported the analytical data for the compound (2S,3S)-ethyl 3-(3-bromophenyl)-4-nitroisoxazol-5-yl)-2,3-dihydro-1-H-pyrrole-2 carboxylate which have been crystallized for the absolute configuration CCDC1009050.

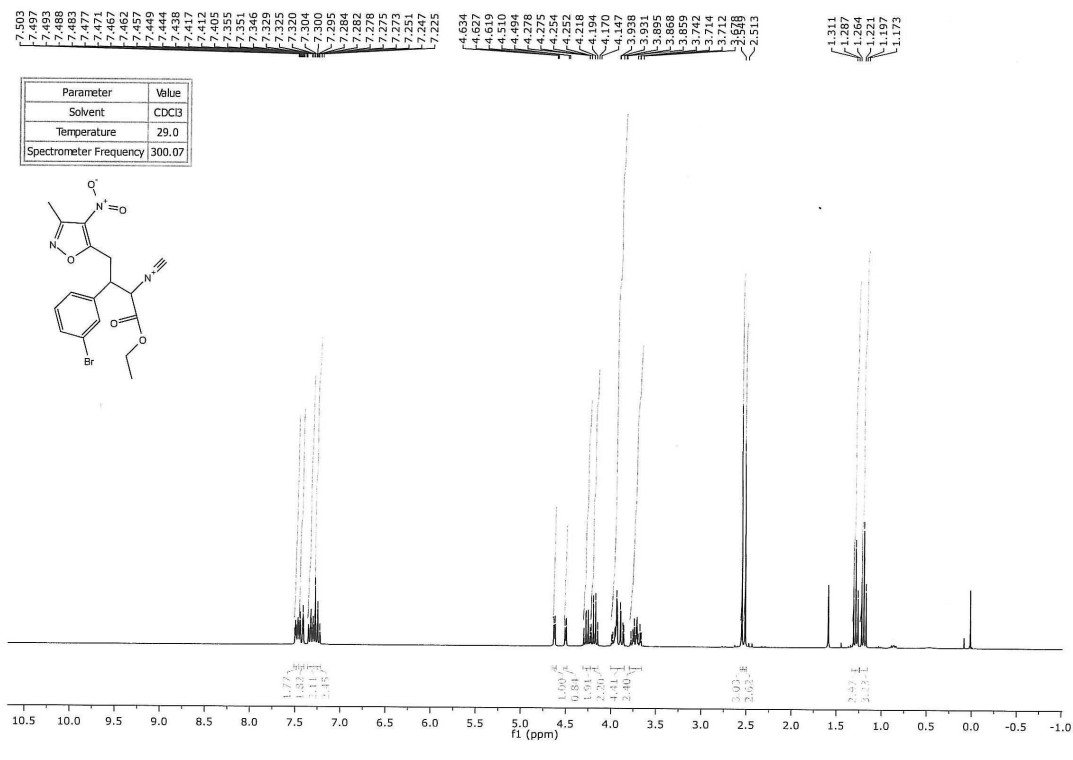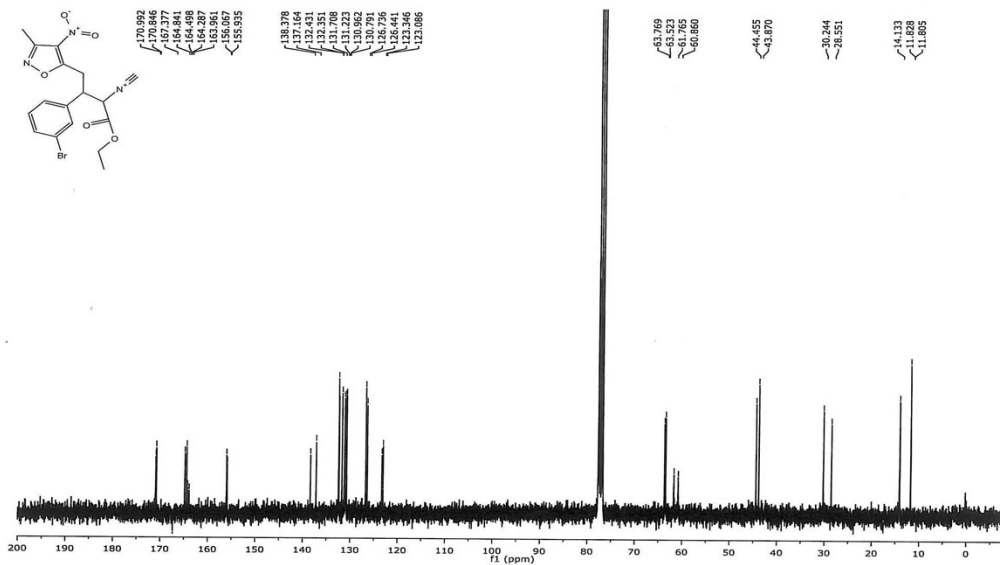

|                        |                   |
|------------------------|-------------------|
| Parameter              | Value             |
| Solvent                | CDCl <sub>3</sub> |
| Temperature            | 29.0              |
| Spectrometer Frequency | 300.07            |

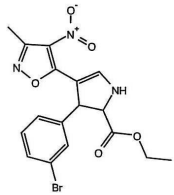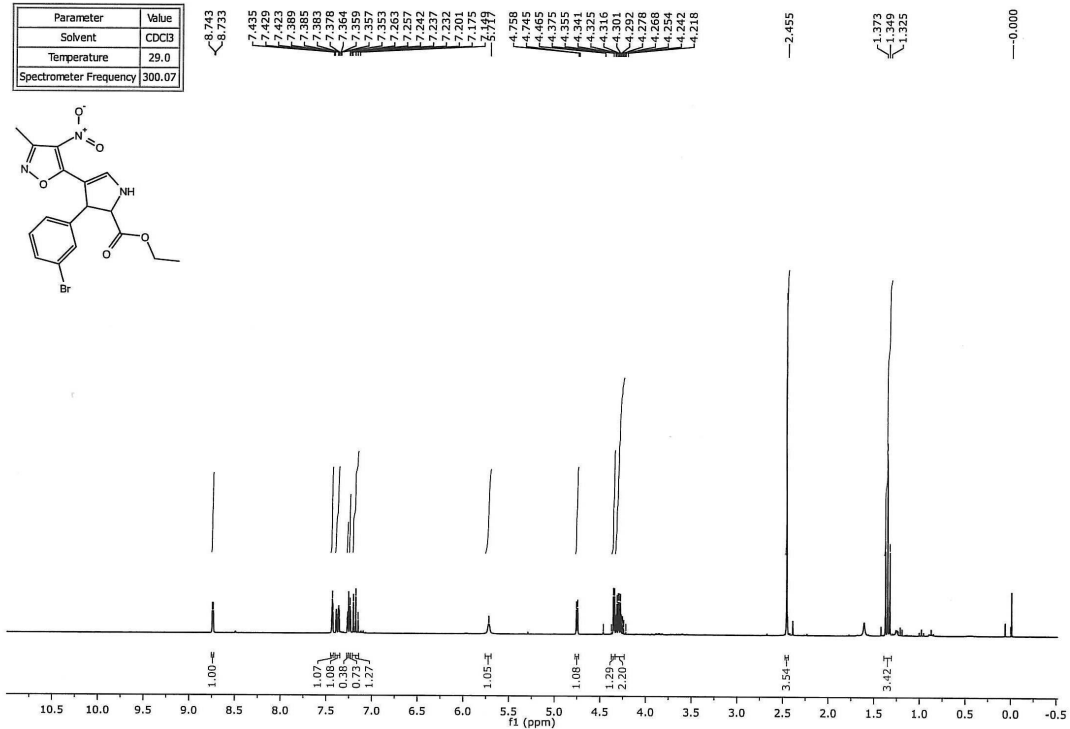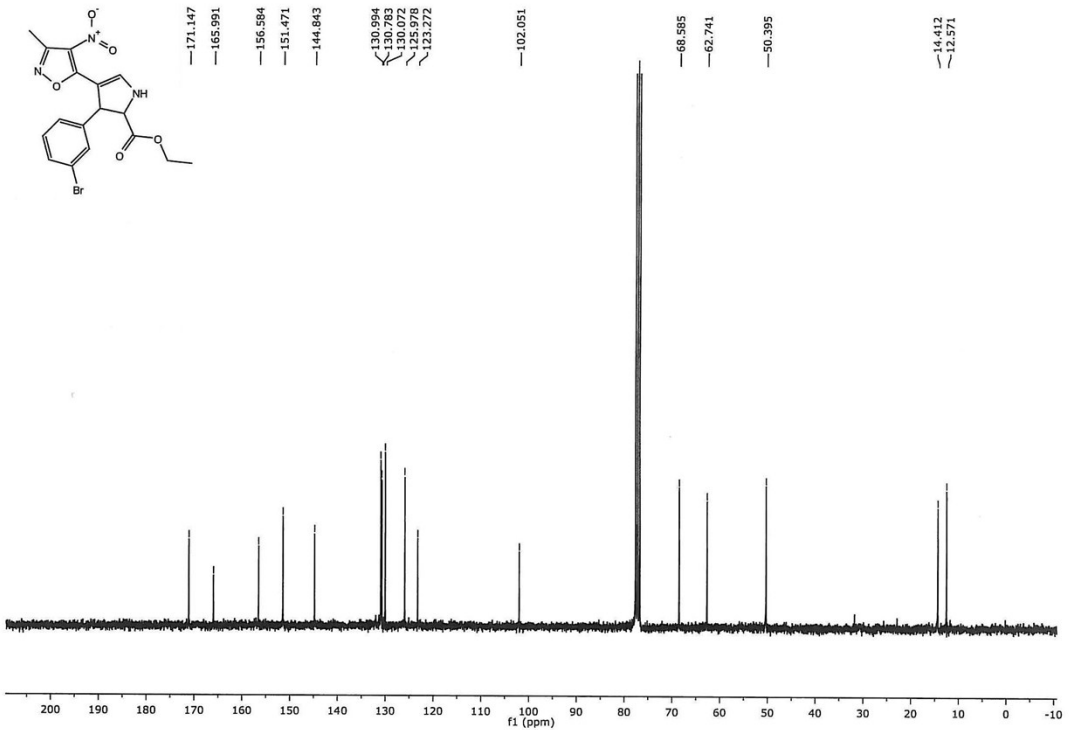

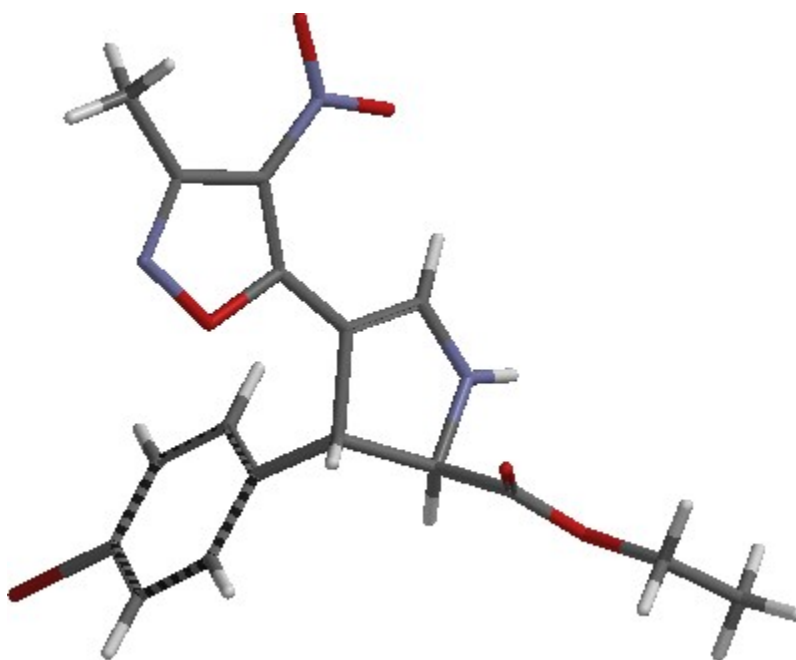

Compound 7

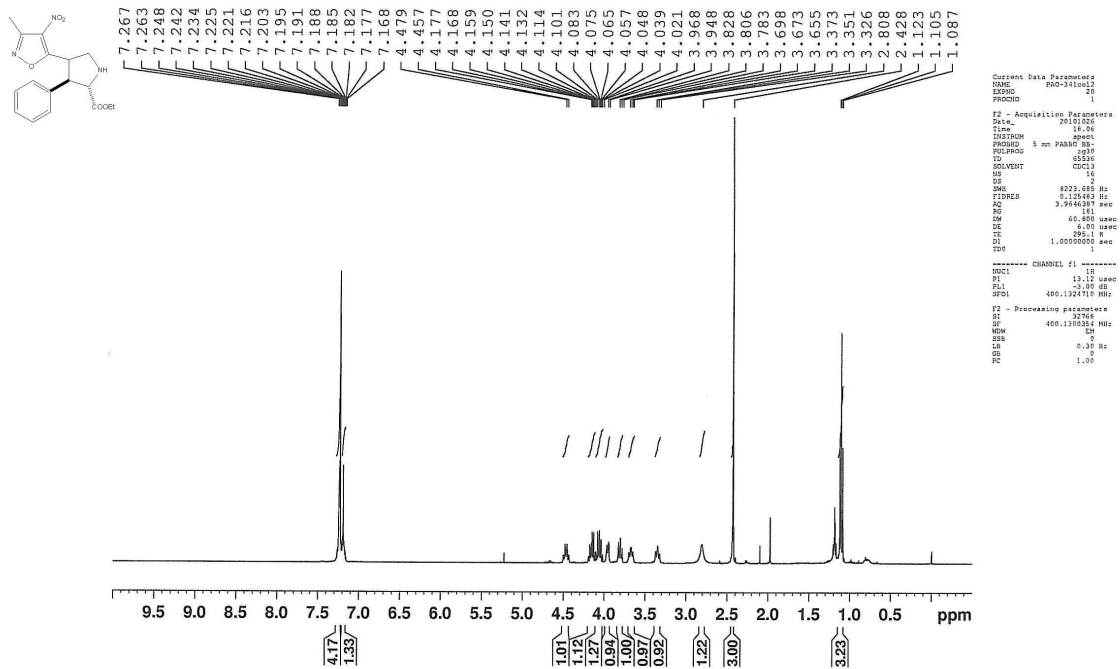

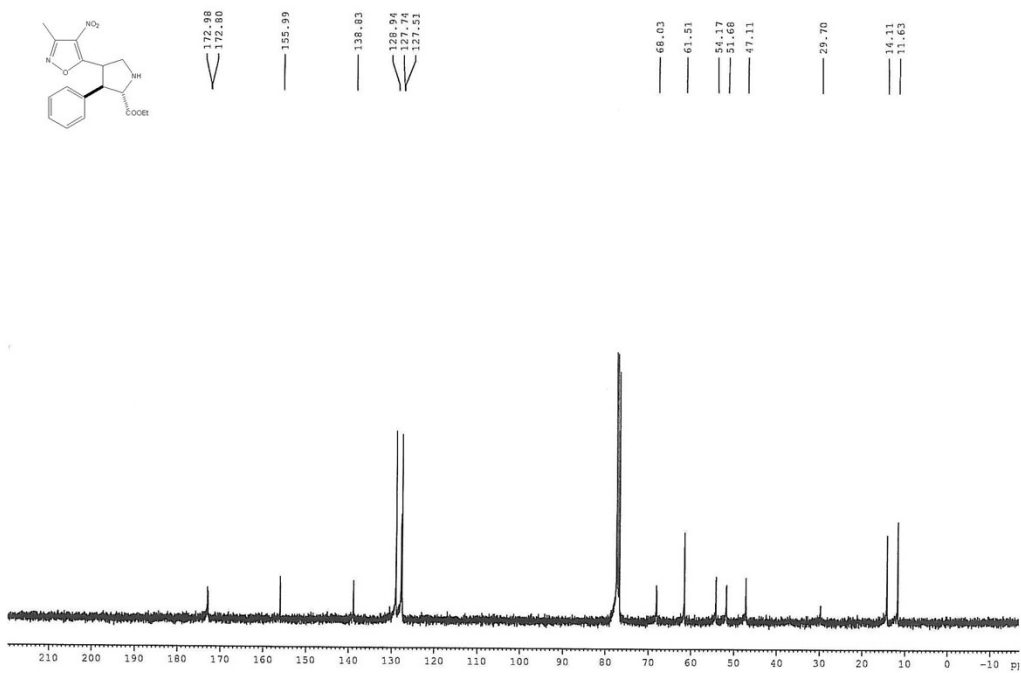

### Compound 8

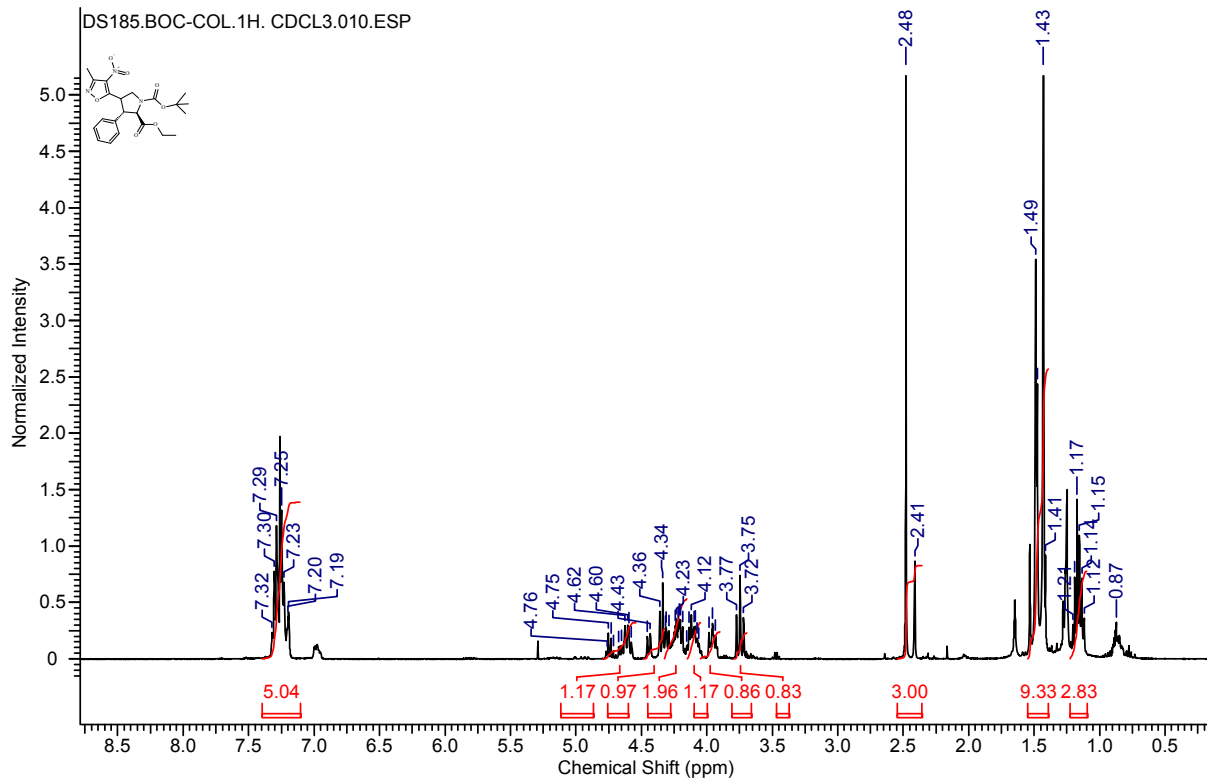



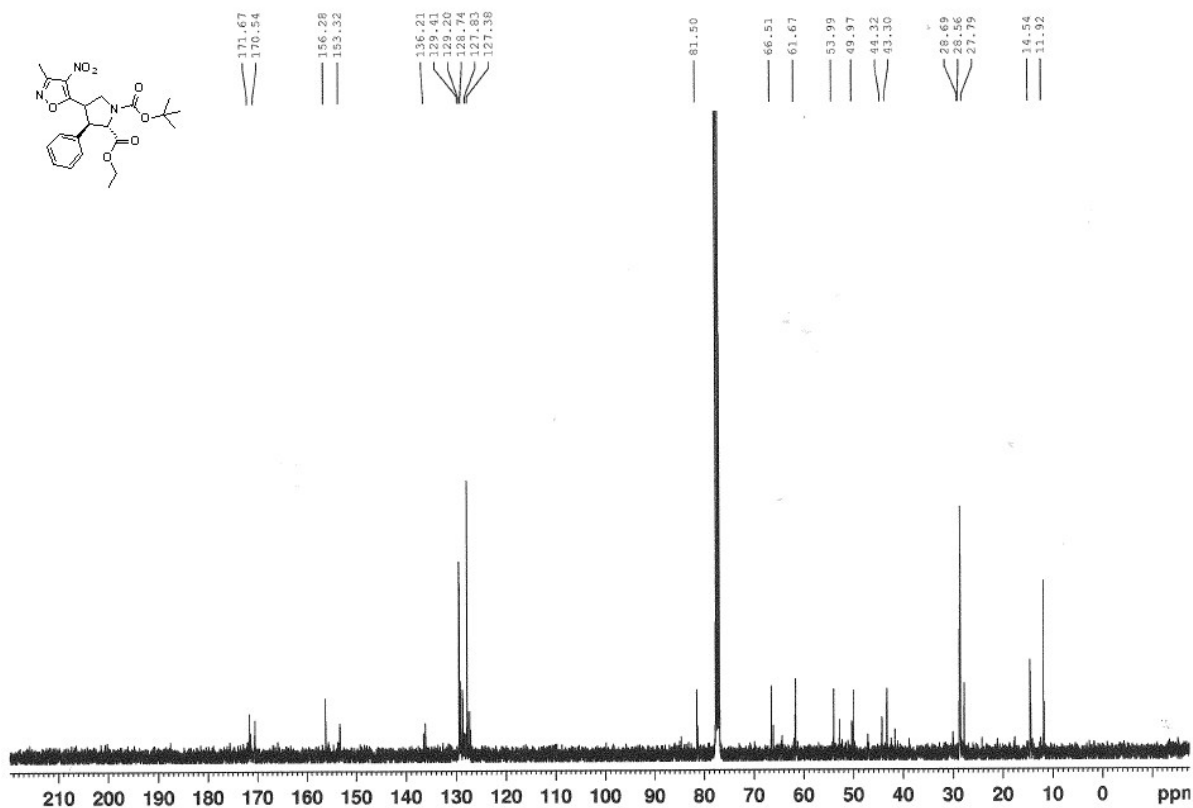

**Compound 9**

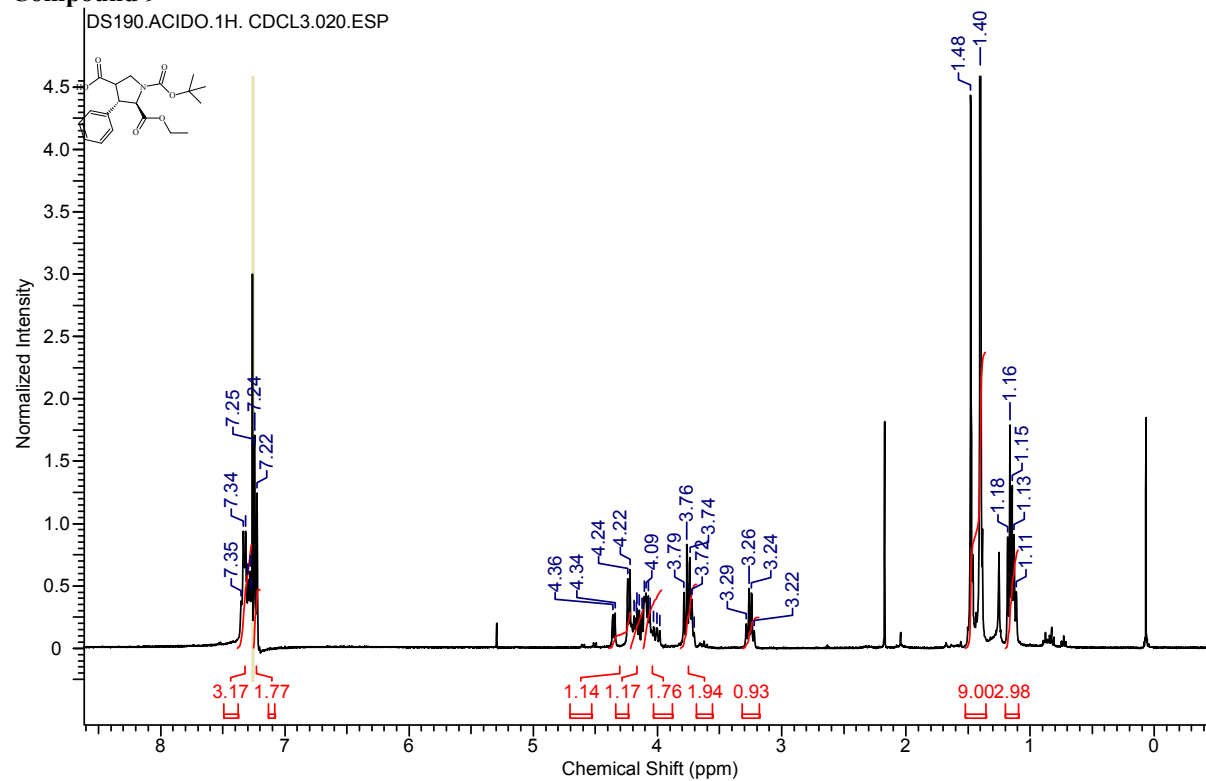

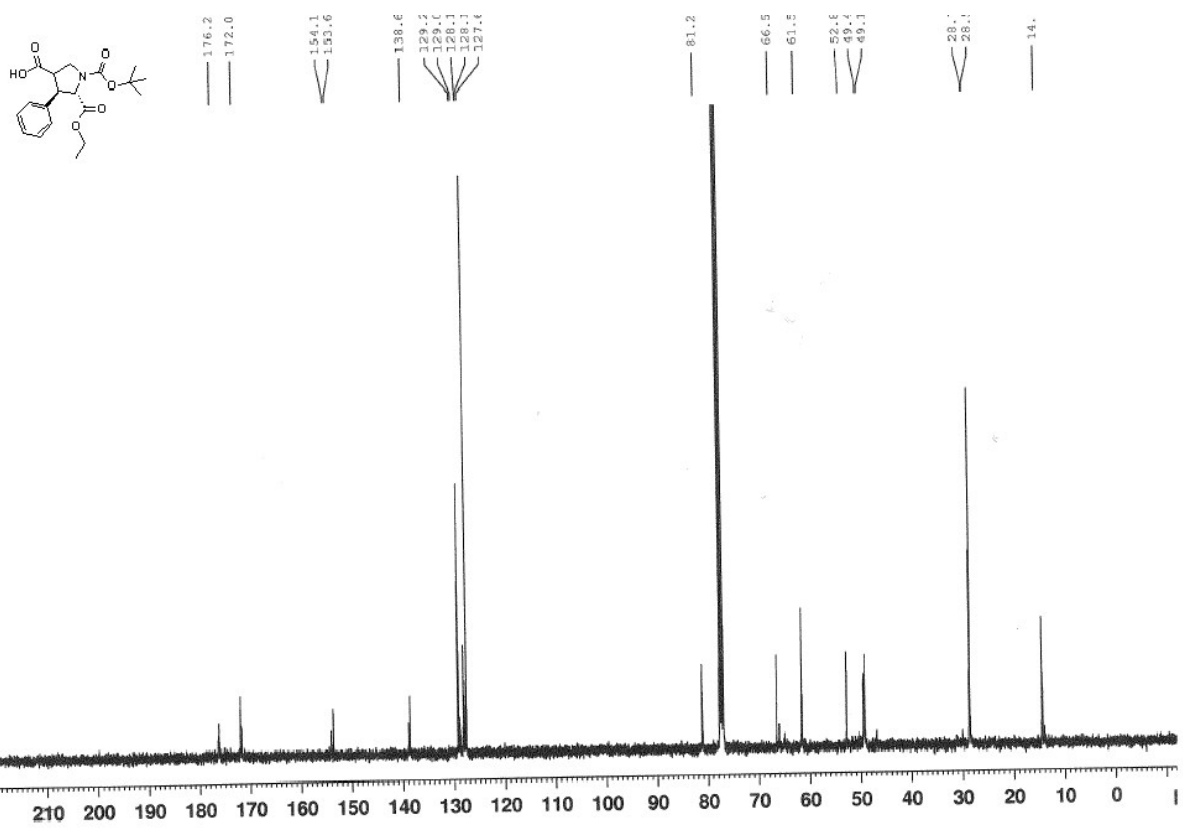

Supplement: c5ob01880c1.pdf [file c5ob01880c1.pdf]
